# Supplementary material for: MAP-CARE: Enhancing Cross-Lingual Medical Intervention Terms Analysis Through LLM-supported Semantic Embeddings
Source: Research Square preprint supplement (doi:10.21203/rs.3.rs-6848278/v1), 2025-06-13
Supplement: Supplementary file 1 [file a2d33bffca86f9ab70299c2c.xlsx]

## Sheet: T1 prompts
Supplementary Table 1. Prompts for Gemma LLM.
Task	Prompt
German translation	FROM gemma2 PARAMETER temperature 0 SYSTEM Translate from German to English. Input text is from the clinical context. Acronyms in the text will be medical/surgical acronyms. Include an explanation of the term. Do not include a medical disclaimer since this is a research project. Do not include greetings, conclusions, or anything else, just the requested output. The output format must be the trans…
French translation	FROM gemma2 PARAMETER temperature 0 SYSTEM Translate from French to English. Input text is from the clinical context. Acronyms in the text will be medical/surgical acronyms. Include an explanation of the term. Do not include a medical disclaimer since this is a research project. Do not include greetings, conclusions, or anything else, just the requested output. The output format must be the trans…
Italian translation	FROM gemma2 PARAMETER temperature 0 SYSTEM Translate from Italian to English. Input text is from the clinical context. Acronyms in the text will be medical/surgical acronyms. Include an explanation of the term. Do not include a medical disclaimer since this is a research project. Do not include greetings, conclusions, or anything else, just the requested output. The output format must be the tran…

## Sheet: T2 eval1
Supplementary Table 2. Evaluation 1.
nbchar	item type	codable	indent level	CHOP_code	CHOP_text	CHOP_translation	index	OPS_code	OPS_text	OPS_translation	Tx Validation reviewer B	Tx Validation reviewer A
6	T	oui	6	Z00.66.22	Koronarangioplastik [PTCA] mit Antikörper-beschichteten Ballons	Coronary angioplasty [PTCA] with antibody-coated balloons	17388	8-83b.b1	nicht operative therapeutische massnahmen: Maßnahmen für den Blutkreislauf: Therapeutische Katheterisierung und Kanüleneinlage in Gefäße: Zusatzinformationen zu Materialien: Art der verwendeten Ballons: Antikörperbeschichtete Ballons	Non-operative therapeutic measures: Measures for the circulatory system: Therapeutic catheterization and cannulation of vessels: Additional information on materials: Type of balloons used: Antibody-coated balloons	equal	equal
6	T	oui	6	Z00.66.42	Selektive Embolisation von Koronarien mit embolisierenden (ablösbaren) Ballons	Selective coronary embolization with embolizing (detachable) balloons	17101	8-837.72	nicht operative therapeutische massnahmen: Maßnahmen für den Blutkreislauf: Therapeutische Katheterisierung und Kanüleneinlage in Gefäße: Perkutan-transluminale Gefäßintervention an Herz und Koronargefäßen: Selektive Embolisation und/oder Infarzierung: Mit ablösbaren Ballons	Non-operative therapeutic measures: Measures for the circulatory system: Therapeutic catheterization and cannulation into vessels: Percutaneous transluminal intervention of heart and coronary arteries: Selective embolization and/or infarction with detachable balloons	equal	equal
6	T	oui	6	Z00.98.12	Postoperative intrathekale und intraventrikuläre Medikamentendosis-Anpassung	Postoperative adjustment of intrathecal and intraventricular medication doses	14765	8-011.32	nicht operative therapeutische massnahmen: Applikation von Medikamenten und Nahrung und therapeutische Injektion: Applikation von Medikamenten und Nahrung: Intrathekale und intraventrikuläre Applikation von Medikamenten durch Medikamentenpumpen: Postoperative intrathekale und intraventrikuläre Medikamentendosis-Anpassung nach Anlage der Medikamentenpumpe: Bei einer implantierten programmierbaren …	Non-operative therapeutic measures: Application of medication and nutrition and therapeutic injections: Application of medication and nutrition: Intrathecal and intraventricular application of medication via drug pumps: Postoperative adjustment of intrathecal and intraventricular medication doses after implantation of the drug pump: In case of an implanted programmable drug pump with continuous r…	equal	equal
4	T	oui	4	Z01.10	Monitoring des intrakraniellen Drucks	Monitoring of intracranial pressure	18	1-204.0	diagnostische massnahmen: Untersuchung einzelner Körpersysteme: Neurologische Untersuchungen: Untersuchung des Liquorsystems: Messung des Hirndruckes	Diagnostic measures: Examination of individual body systems: Neurological examinations: Examination of the cerebrospinal fluid system: Measurement of intracranial pressure	equal	equal
6	T	oui	6	Z01.12.99	Offene Biopsie an den Hirnhäuten, sonstige	Open biopsy of the meninges, other	231	1-401.5	diagnostische massnahmen: Biopsie ohne Inzision: Biopsie ohne Inzision an Nervensystem und endokrinen Organen: Perkutane Biopsie an intrakraniellem Gewebe mit Steuerung durch bildgebende Verfahren: Hirnhäute	Diagnostic measures: Biopsy without incision: Biopsy without incision of nervous system and endocrine organs: Percutaneous biopsy of intracranial tissue with image-guided control: Dura mater	equal	equal
6	T	oui	6	Z01.16.11	Monitoring der zerebralen Sauerstoffsättigung [PtiO2], invasiv	Monitoring of cerebral oxygen saturation [PtiO2], invasive	17984	8-923.0	nicht operative therapeutische massnahmen: Patientenmonitoring: Neurologisches Monitoring: Monitoring der hirnvenösen Sauerstoffsättigung: Invasiv	Non-operative therapeutic measures: Patient monitoring: Neurological monitoring: Monitoring of cerebral venous oxygen saturation: Invasive	equal	equal
6	T	oui	6	Z01.23.20	Rekraniotomie mit Entfernen von alloplastischem Material oder Medikamententrägers aus dem Schädelknochen	Craniotomy with removal of alloplastic material or drug carrier from the skull bone	1865	5-012.5	operationen: Operationen am Nervensystem: Inzision (Trepanation), Exzision und Destruktion an Schädel, Gehirn und Hirnhäuten: Inzision der Schädelknochen [Kraniotomie und Kraniektomie]: Entfernung von alloplastischem Material aus einem Schädelknochen	Surgeries on the nervous system: Incision (trepanation), excision and destruction of skull, brain and meninges: Incision of the skull bone [craniotomy and craniectomy]: Removal of alloplastic material from a skull bone	equal	equivalent
6	T	oui	6	Z01.27.10	Entfernung eines intrazerebralen Katheters zur intraventrikulären Infusion	Removal of an intracranial catheter for intraventricular infusion	2136	5-028.8	operationen: Operationen am Nervensystem: Andere Operationen an Schädel, Gehirn und Hirnhäuten: Funktionelle Eingriffe an Schädel, Gehirn und Hirnhäuten: Entfernung eines intrazerebralen Katheters zur intraventrikulären Infusion	Procedures: Neurosurgical procedures: Other procedures on skull, brain and meninges: Functional interventions on skull, brain and meninges: Removal of an intracranial catheter for intraventricular infusion	equal	equivalent
6	T	oui	6	Z01.39.21	Sonstige Inzision am Gehirn, Stereotaktische Entleerung eines intrakraniellen Abszesses	Other incision on the brain, stereotactic drainage of an intracranial abscess	1906	5-014.2	operationen: Operationen am Nervensystem: Inzision (Trepanation), Exzision und Destruktion an Schädel, Gehirn und Hirnhäuten: Stereotaktische Operationen an Schädel, Gehirn und Hirnhäuten: Entleerung eines intrakraniellen Abszesses	Surgeries on the nervous system: Incision (trepanation), excision and destruction of skull, brain and meninges: Stereotactic surgeries on skull, brain and meninges: Drainage of an intracranial abscess	equal	equal
6	T	oui	6	Z01.39.50	Entfernung eines intrakraniellen Implantats	Removal of an intracranial implant	2167	5-029.b	operationen: Operationen am Nervensystem: Andere Operationen an Schädel, Gehirn und Hirnhäuten: Andere Operationen an Schädel, Gehirn und Hirnhäuten: Entfernung einer Neuroprothese	Procedures: Neurosurgical procedures: Other procedures on skull, brain and meninges: Other procedures on skull, brain and meninges: Removal of a neuroprosthesis	equal	equal
6	T	oui	6	Z01.53.10	Lobektomie am Gehirn, hirneigenes intrazerebrales Tumorgewebe	Lobectomy of the brain, intracranial tumor tissue	1939	5-015.0	operationen: Operationen am Nervensystem: Inzision (Trepanation), Exzision und Destruktion an Schädel, Gehirn und Hirnhäuten: Exzision und Destruktion von erkranktem intrakraniellem Gewebe: Intrazerebrales Tumorgewebe, hirneigen	Surgeries on the nervous system: Incision (trepanation), excision and destruction of skull, brain and meninges: Excision and destruction of diseased intracranial tissue: Intracerebral tumor tissue, brain-own	equal	wider
6	T	oui	6	Z01.6X.22	Exzision und Destruktion von sonstigem erkrankten Gewebe an der Kalotte mit Hirnhäuten	Excision and destruction of other diseased tissue on the skull with meninges	1967	5-016.5	operationen: Operationen am Nervensystem: Inzision (Trepanation), Exzision und Destruktion an Schädel, Gehirn und Hirnhäuten: Exzision und Destruktion von erkranktem Gewebe der Schädelknochen: Schädelbasis und Hirnhäute, sonstiges erkranktes Gewebe	Surgeries on the nervous system: Incision (trepanation), excision and destruction of skull, brain and meninges: Excision and destruction of diseased tissue of the cranial bones: Skull base and meninges, other diseased tissue	equal	equal
6	T	oui	6	Z02.05.11	Einsetzen eines CAD-Implantats an Hirnschädel ohne Beteiligung des Gesichtsschädels, grosser oder komplexer Defekt	Placement of a CAD implant in the cranial vault without involvement of the facial skull, large or complex defect	2016	5-020.71	operationen: Operationen am Nervensystem: Andere Operationen an Schädel, Gehirn und Hirnhäuten: Kranioplastik: Rekonstruktion des Hirnschädels ohne Beteiligung des Gesichtsschädels, mit alloplastischem Material: Mit computerassistiert vorgefertigtem Implantat [Computer assisted design-Implantat], einfacher Defekt	Procedures: Neurosurgical procedures: Other procedures on skull, brain and meninges: Cranioplasty: Reconstruction of the cranial vault without involvement of the facial skull, with alloplastic material: With computer-assisted prefabricated implant [Computer-aided design-implant], simple defect	equal	equal
6	T	oui	6	Z02.12.21	Sonstige Duraplastik mit Kranioplastik an der Konvexität	Other dural plastic with cranioplasty on the convexity	2028	5-021.4	operationen: Operationen am Nervensystem: Andere Operationen an Schädel, Gehirn und Hirnhäuten: Rekonstruktion der Hirnhäute: Duraplastik mit Kranioplastik an der Konvexität	Surgeries: Neurosurgeries: Other surgeries on skull, brain and meninges: Reconstruction of the meninges: Duraplasty with cranioplasty on the convexity	equal	equal
4	T	oui	4	Z02.33	Ventrikelshunt zur Thoraxhöhle	Ventricular shunt to the pleural cavity	2065	5-023.2	operationen: Operationen am Nervensystem: Andere Operationen an Schädel, Gehirn und Hirnhäuten: Anlegen eines Liquorshuntes [Shunt-Implantation]: Ableitung in den Pleuraspalt	Procedures: Neurosurgical procedures: Other procedures on skull, brain and meninges: Placement of a shunt (shunt implantation): Drainage into the pleural space	equal	equivalent
6	T	oui	6	Z02.41.20	Spülung und Exploration eines Ventrikelshunts, peripherer Teil	Irrigation and exploration of a ventricular shunt, peripheral portion	2078	5-024.4	operationen: Operationen am Nervensystem: Andere Operationen an Schädel, Gehirn und Hirnhäuten: Revision und Entfernung von Liquorableitungen: Probatorisches Abklemmen des peripheren Katheters	Procedures: Neurosurgical procedures: Other procedures on skull, brain and meninges: Revision and removal of cerebrospinal fluid shunts: Trial clamping of the peripheral catheter	equal	equal
6	T	oui	6	Z02.93.32	Implantation oder Wechsel von temporären Mikroelektroden zur multilokulären Ableitung und Stimulation	Implantation or exchange of temporary microelectrodes for multilocular recording and stimulation	2145	5-028.b	operationen: Operationen am Nervensystem: Andere Operationen an Schädel, Gehirn und Hirnhäuten: Funktionelle Eingriffe an Schädel, Gehirn und Hirnhäuten: Implantation eines temporären subduralen Neuroelektrodensystems (Grid)	Procedures: Neurosurgical procedures: Other procedures on skull, brain and meninges: Functional procedures on skull, brain and meninges: Implantation of a temporary subdural neuroelectrode system (grid)	equal	equal
6	T	oui	6	Z02.93.42	Revision ohne Ersatz der Elektroden zur intrakraniellen Neurostimulation, stereotaktisch, permanentes Mehrelektrodensystem zur Dauerstimulation	Revision without replacement of electrodes for intracranial neurostimulation, stereotactically, permanent multielectrode system for continuous stimulation	2133	5-028.5	operationen: Operationen am Nervensystem: Andere Operationen an Schädel, Gehirn und Hirnhäuten: Funktionelle Eingriffe an Schädel, Gehirn und Hirnhäuten: Revision einer permanenten Neurostimulationselektrode zur Dauerstimulation	Procedures: Procedures on the nervous system: Other procedures on skull, brain and meninges: Functional interventions on skull, brain and meninges: Revision of a permanent neurostimulation electrode for continuous stimulation	equal	equal
6	T	oui	6	Z02.99.14	Stereotaktische Implantation, Revision oder Wechsel von intrazerebralen Kathetern zur intraventrikulären Infusion	Stereotactic implantation, revision, or exchange of intracranial catheters for intraventricular infusion	2136	5-028.8	operationen: Operationen am Nervensystem: Andere Operationen an Schädel, Gehirn und Hirnhäuten: Funktionelle Eingriffe an Schädel, Gehirn und Hirnhäuten: Entfernung eines intrazerebralen Katheters zur intraventrikulären Infusion	Procedures: Neurosurgical procedures: Other procedures on skull, brain and meninges: Functional interventions on skull, brain and meninges: Removal of an intracranial catheter for intraventricular infusion	equal	equal
4	T	oui	4	Z03.01	Entfernen eines Fremdkörpers vom Spinalkanal	Removal of a foreign body from the spinal canal	2265	5-033.4	operationen: Operationen am Nervensystem: Operationen an Rückenmark, Rückenmarkhäuten und Spinalkanal: Inzision des Spinalkanals: Entfernung eines Fremdkörpers aus dem Epiduralraum	Surgeries: Neurosurgeries: Surgeries on spinal cord, dura mater and spinal canal: Incision of the spinal canal: Removal of a foreign body from the epidural space	equal	equal
6	T	oui	6	Z03.05.23	Inzision des Rückenmarks und der Rückenmarkhäute zur Entleerung eines intramedullären Hämatoms oder Abszesses	Incision of the spinal cord and dura mater to evacuate an intramedullary hematoma or abscess	2273	5-034.4	operationen: Operationen am Nervensystem: Operationen an Rückenmark, Rückenmarkhäuten und Spinalkanal: Inzision von Rückenmark und Rückenmarkhäuten: Entleerung eines intramedullären Hämatoms	Surgeries: Surgeries on the nervous system: Surgeries on spinal cord, meninges and spinal canal: Incision of spinal cord and meninges: Drainage of an intramedullary hematoma	equal	narrower
6	T	oui	6	Z03.59.13	Sonstige plastische Rekonstruktion und Operationen an Strukturen des Spinalkanals, Spinale Duraplastik	Other plastic reconstructions and operations on structures of the spinal canal, spinal dural plasty	2299	5-036.8	operationen: Operationen am Nervensystem: Operationen an Rückenmark, Rückenmarkhäuten und Spinalkanal: Plastische Operationen an Rückenmark und Rückenmarkhäuten: Spinale Duraplastik	Surgeries: Neurosurgeries: Surgeries on spinal cord, meninges and spinal canal: Plastic surgeries on spinal cord and meninges: Spinal dural plasty	equal	equal
6	T	oui	6	Z04.01.11	Exzision eines Akustikusneurinoms, translabyrinthärer Zugang	Excision of an acoustic neuroma, translabyrinthine approach	1855	5-011.9	operationen: Operationen am Nervensystem: Inzision (Trepanation), Exzision und Destruktion an Schädel, Gehirn und Hirnhäuten: Zugang durch die Schädelbasis: Translabyrinthär	Surgeries on the nervous system: Incision (trepanation), excision and destruction of skull, brain and meninges: Access through the cranial base: translabyrinthine	equal	inexact
6	T	oui	6	Z04.11.40	Geschlossene [perkutane] [Nadel-] Biopsie an Nerven der unteren Extremität	Closed [percutaneous] [needle]-biopsy of nerves in the lower extremity	249	1-405.8	diagnostische massnahmen: Biopsie ohne Inzision: Biopsie ohne Inzision an Nervensystem und endokrinen Organen: Perkutane (Nadel-)Biopsie an peripheren Nerven: Nerven Bein	Diagnostic measures: Needle biopsy: Needle biopsy of the nervous system and endocrine organs: Percutaneous (needle) biopsy of peripheral nerves: Nerve leg	equal	equal
6	T	oui	6	Z04.3X.22	Epineurale Naht von Nerven der Schulter, sekundär	Epineural suture of shoulder nerves, secondary	2466	5-046.2	operationen: Operationen am Nervensystem: Operationen an Nerven und Nervenganglien: Epineurale Naht eines Nerven und Nervenplexus, sekundär: Nerven Schulter	Surgeries: Neurosurgeries: Surgeries on nerves and nerve ganglia: Secondary epineural suture of a nerve and plexus, shoulder nerve	equal	equal
6	T	oui	6	Z04.49.14	Sonstige Dekompression oder Lösung von Adhäsionen am Plexus lumbosacralis, Leiste und Beckenboden	Other decompression or lysis of adhesions at the lumbosacral plexus, groin, and pelvic floor	2622	5-056.7	operationen: Operationen am Nervensystem: Andere Operationen an Nerven und Nervenganglien: Neurolyse und Dekompression eines Nerven: Nerven Leiste und Beckenboden	Procedures: Procedures on the nervous system: Other procedures on nerves and nerve ganglia: Nerve neurolysis and decompression: Nerve groin and pelvic floor	equal	equal
6	T	oui	6	Z04.6X.73	Transposition mit Neurolyse und Dekompression eines Nerven der Hand	Transposition with neurolysis and decompression of a hand nerve	2632	5-057.4	operationen: Operationen am Nervensystem: Andere Operationen an Nerven und Nervenganglien: Neurolyse und Dekompression eines Nerven mit Transposition: Nerven Hand	Surgeries: Neurosurgeries: Other surgeries on nerves and nerve ganglia: Nerve neurolysis and decompression with transposition: Hand nerve	equal	equal
4	T	oui	4	Z05.23	Lumbale Sympathektomie	Lumbar sympathectomy	2434	5-043.2	operationen: Operationen am Nervensystem: Operationen an Nerven und Nervenganglien: Sympathektomie: Lumbosakral	Procedures: Procedures on the nervous system: Operations on nerves and nerve ganglia: Sympathectomy: Lumbar-sacral	equal	equal
6	T	oui	6	Z06.95.12	Vollständige Parathyreoidektomie, mit Replantation heterotop	Total parathyroidectomy with heterotopic replantation	2811	5-069.31	operationen: Operationen an endokrinen Drüsen: Operationen an Schilddrüse und Nebenschilddrüse: Andere Operationen an Schilddrüse und Nebenschilddrüsen: Replantation einer Nebenschilddrüse: Heterotop (z.B. Oberarm)	operations: Operations on endocrine glands: Operations on the thyroid and parathyroid glands: Other operations on the thyroid and parathyroid glands: Parathyroid gland replantation: Heterotopic (e.g., upper arm)	equal	equal
6	T	oui	6	Z07.13.12	Stereotaktische Biopsie an der Hypophyse durch transfrontalen Zugang	Stereotactic biopsy of the pituitary gland via a transsphenoidal approach	769	1-515.0	diagnostische massnahmen: Biopsie durch Inzision: Biopsie an Nervengewebe, Hypophyse, Corpus pineale durch Inzision und Trepanation von Schädelknochen: Stereotaktische Biopsie an Hypophyse und Corpus pineale: Hypophyse	Diagnostic measures: Incisional biopsy: Biopsy of nerve tissue, pituitary gland, pineal body through incision and trepanation of skull bone: Stereotactic biopsy of the pituitary gland and pineal body: Pituitary gland	equal	inexact
4	T	oui	4	Z07.94	Transplantation von Thymusgewebe	Transplantation of thymus tissue	2871	5-078.0	operationen: Operationen an endokrinen Drüsen: Operationen an anderen endokrinen Drüsen: Andere Operationen am Thymus: Transplantation	operations: Operations on endocrine glands: Operations on other endocrine glands: Other operations on the thymus: Transplantation	equal	equal
6	T	oui	6	Z08.49.11	Sonstiger Eingriff zur Korrektur eines Entropiums oder Ektropiums, Reposition einer Lidlamelle	Other intervention for correction of entropion or ectropion, repositioning of a lid lamella	3005	5-093.6	operationen: Operationen an den Augen: Operationen an den Augenlidern: Korrekturoperation bei Entropium und Ektropium: Durch Reposition einer Lidlamelle	operations: Eye surgeries: Eyelid surgeries: Corrective surgery for entropion and ectropion: By repositioning a lid lamella	equal	equal
6	T	oui	6	Z08.69.11	Plastische Rekonstruktion des Augenlids mit alloplastischem Material	Plastic reconstruction of the eyelid with alloplastic material	3041	5-096.24	operationen: Operationen an den Augen: Operationen an den Augenlidern: Andere Rekonstruktion der Augenlider: Durch Transplantation: Alloplastisches Material	operations: Eye surgeries: Eyelid surgeries: Other eyelid reconstructions: Through transplantation: Alloplastic material	equal	equal
4	T	oui	4	Z13.01	Entfernen eines Fremdkörpers aus der Linse mittels Magnet	Removal of a foreign body from the lens using a magnet	3378	5-140.0	operationen: Operationen an den Augen: Operationen an der Linse: Entfernung eines Fremdkörpers aus der Augenlinse: Mit Magnet	Procedures: Eye surgeries: Lens surgeries: Removal of a foreign body from the eye lens: With magnet	equal	equal
4	T	oui	4	Z14.33	Versorgung eines Retinarisses durch Xenon-Bogen-Photokoagulation	Treatment of a retinal tear with xenon arc photocoagulation	3462	5-155.3	operationen: Operationen an den Augen: Operationen an Retina, Choroidea und Corpus vitreum: Destruktion von erkranktem Gewebe an Retina und Choroidea: Durch lokale Laserkoagulation	Procedures: Eye surgeries: Surgeries on retina, choroid, and vitreous body: Destruction of diseased tissue in the retina and choroid: By local laser coagulation	equal	equal
6	T	oui	6	Z14.71.10	Vordere Vitrektomie über Pars plana	Anterior vitrectomy through pars plana	3499	5-158.0	operationen: Operationen an den Augen: Operationen an Retina, Choroidea und Corpus vitreum: Pars-plana-Vitrektomie: Vordere Vitrektomie über Pars plana	operations: Eye surgeries: Surgeries on retina, choroid and vitreous body: Pars plana vitrectomy: Anterior vitrectomy via pars plana	equal	equal
6	T	oui	6	Z18.6X.30	Konstruktion eines (nicht bestehenden) äusseren Gehörgangs	Construction of an external auditory canal	3678	5-185	operationen: Operationen an den Ohren: Operationen an Ohrmuschel und äußerem Gehörgang: Konstruktion und Rekonstruktion des äußeren Gehörganges	Surgeries: Ear surgeries: Surgeries on the pinna and external auditory canal: Construction and reconstruction of the external auditory canal	equal	wider
4	T	oui	4	Z18.72	Reinsertion eines amputierten Ohres	Reimplantation of an amputated ear	3637	5-18...5-20	operationen: Operationen an den Ohren	Operations on the ears	equal	equal
3	T	oui	3	Z19.0	Mobilisation des Stapes	Stapes mobilization	3839	5-209.e2	operationen: Operationen an den Ohren: Andere Operationen an Mittel- und Innenohr: Andere Operationen am Mittel- und Innenohr: Einführung eines aktiven mechanischen Hörimplantates: An den Steigbügel	Operations on the ears: Other operations on the middle and inner ear: Other operations on the middle and inner ear: Implantation of an active mechanical hearing implant: On the stirrup	equal	equal
6	T	oui	6	Z19.56.20	Tympanoplastik mit Anlage einer Ohrradikalhöhle (offene Kavität), ohne Implantation einer Prothese oder mit Implantation eines autogenen Ossikels	Tympanoplasty with creation of a radical ear cavity (open cavity), without implantation of a prosthesis or with implantation of an autologous ossicle	3748	5-195.c0	operationen: Operationen an den Ohren: Mikrochirurgische Operationen am Mittelohr: Tympanoplastik (Verschluss einer Trommelfellperforation und Rekonstruktion der Gehörknöchelchen): Tympanoplastik mit Anlage einer Ohrradikalhöhle: Ohne Implantation einer Prothese	Surgeries: Ear surgeries: Microsurgical middle ear surgery: Tympanoplasty (closure of a tympanic membrane perforation and reconstruction of the ossicles): Tympanoplasty with creation of an attic cavity: Without prosthesis implantation	equal	equal
6	T	oui	6	Z20.09.10	Sonstige Myringotomie ohne Paukenröhrcheneinlage	Other myringotomy without tympanostomy tube insertion	3770	5-200.4	operationen: Operationen an den Ohren: Andere Operationen an Mittel- und Innenohr: Parazentese [Myringotomie]: Ohne Legen einer Paukendrainage	Surgeries: Ear surgeries: Other surgeries on the middle and inner ear: Myringotomy: Without placement of a tympanostomy tube	equal	equal
6	T	oui	6	Z20.23.13	Explorative Tympanotomie	Exploratory tympanotomy	3777	5-202.2	operationen: Operationen an den Ohren: Andere Operationen an Mittel- und Innenohr: Inzision an Warzenfortsatz und Mittelohr: Explorative Tympanotomie	Surgeries: Ear surgeries: Other surgeries on middle and inner ear: Incision at the promontory and middle ear: Exploratory tympanotomy	equal	equal
6	T	oui	6	Z20.44.14	Mastoidektomie, subtotale Resektion des Felsenbeins [subtotale Petrosektomie], mit Obliteration von Fett- sowie Muskelgewebe	Mastoidectomy, subtotal resection of the temporal bone [subtotal petrosectomy], with obliteration of fat and muscle tissue	3787	5-203.9	operationen: Operationen an den Ohren: Andere Operationen an Mittel- und Innenohr: Mastoidektomie: Totale Resektion des Felsenbeins [Petrosektomie]	Surgeries: Ear surgeries: Other surgeries on middle and inner ear: Mastoidectomy: Total resection of the temporal bone [petrosectomy]	equal	wider
6	T	oui	6	Z20.72.11	Destruktion durch Injektion in das Innenohr	Destruction by injection into the inner ear	3637	5-18...5-20	operationen: Operationen an den Ohren	Operations on the ears	equal	equal
3	T	oui	3	Z23.9	Zahnextraktion und Zahnsanierung, sonstige	Tooth extraction and dental sanitation, other	4060	5-230.x	operationen: Operationen an Mundhöhle und Gesicht: Entfernung und Wiederherstellung von Zähnen: Zahnextraktion: Sonstige	Procedures: Operations on oral cavity and face: Removal and restoration of teeth: Tooth extraction: Other	equal	inexact
3	T	oui	3	Z24.7	Anbringen einer orthodontischen Apparatur	Placement of an orthodontic appliance	4160	5-249.2	operationen: Operationen an Mundhöhle und Gesicht: Operationen an Zahnfleisch, Alveolen und Kiefer: Andere Operationen und Maßnahmen an Gebiss, Zahnfleisch und Alveolen: Operative Fixation eines kieferorthopädischen Gerätes	Procedures: Operations on oral cavity and face: Operations on gums, alveoli, and jawbone: Other operations and procedures on dentition, gums, and alveoli: Operative fixation of an orthodontic appliance	equal	equal
6	T	oui	6	Z24.91.99	Extension oder Vertiefung des Sulcus buccolabialis oder lingualis, sonstige	Extension or deepening of the buccal sulcus or lingual sulcus, other	4206	5-259.x	operationen: Operationen an Mundhöhle und Gesicht: Operationen an der Zunge: Andere Operationen an der Zunge: Sonstige	operations: Operations on oral cavity and face: Operations on the tongue: Other operations on the tongue: Miscellaneous	equal	inexact
6	T	oui	6	Z25.2X.23	Partielle Glossektomie, transmandibulärer Zugang, Rekonstruktion mit myokutanem Lappen	Partial glossectomy, transmandibular approach, reconstruction with myocutaneous flap	4182	5-251	operationen: Operationen an Mundhöhle und Gesicht: Operationen an der Zunge: Partielle Glossektomie	Procedures: Operations on oral cavity and face: Tongue operations: Partial glossectomy	equal	equal
4	T	oui	4	Z25.91	Linguale Frenulotomie	Lingual frenulotomy	4204	5-259.1	operationen: Operationen an Mundhöhle und Gesicht: Operationen an der Zunge: Andere Operationen an der Zunge: Durchtrennung des Frenulum linguae	operations: Operations on oral cavity and face: Operations on the tongue: Other operations on the tongue: Frenectomy	equal	equal
6	T	oui	6	Z26.0X.10	Inzision an Speicheldrüse oder -gang, mit Steinentfernung	Incision of salivary gland or duct, with stone removal	4215	5-260.2	operationen: Operationen an Mundhöhle und Gesicht: Operationen an Speicheldrüsen und Speicheldrüsenausführungsgängen: Inzision und Schlitzung einer Speicheldrüse und eines Speicheldrüsenausführungsganges: Entfernung eines Speichelsteines	operations: Operations on the oral cavity and face: Operations on salivary glands and salivary duct systems: Incision and incision of a salivary gland and salivary duct: Removal of a salivary stone	equal	equal
6	T	oui	6	Z26.31.11	Partielle Parotidektomie mit intraoperatives Fazialismonitoring	Partial parotidectomy with intraoperative facial nerve monitoring	4235	5-262.04	operationen: Operationen an Mundhöhle und Gesicht: Operationen an Speicheldrüsen und Speicheldrüsenausführungsgängen: Resektion einer Speicheldrüse: Parotidektomie, partiell: Mit intraoperativem Fazialismonitoring, ohne Entfernung von erkranktem Gewebe im oberen Parapharyngeal- und/oder Infratemporalraum	Operations on oral cavity and face: Operations on salivary glands and salivary gland ducts: Resection of a salivary gland: Partial parotidectomy: With intraoperative facial nerve monitoring, without removal of diseased tissue in the upper parapharyngeal and/or infratemporal space	equal	equal
6	T	oui	6	Z27.22.20	Offene Biopsie (mit Inzision) an Uvula und weichem Gaumen	Open biopsy of uvula and soft palate	308	1-422.00	diagnostische massnahmen: Biopsie ohne Inzision: Biopsie ohne Inzision an Mund, Mundhöhle, Larynx, Pharynx und blutbildenden Organen: Biopsie ohne Inzision am Pharynx: Oropharynx: Uvula	Diagnostic measures: Biopsy without incision: Biopsy without incision of mouth, oral cavity, larynx, pharynx and blood-forming organs: Biopsy without incision of the pharynx: Oropharynx: Uvula	equal	wider
6	T	oui	6	Z27.32.11	Radikale transmandibuläre Exzision [En-bloc-Resektion] von Läsion oder Gewebe am knöchernen Gaumen	Radical transmandibular excision [en bloc resection] of lesion or tissue on the bony palate	4308	5-272.3	operationen: Operationen an Mundhöhle und Gesicht: Andere Operationen an Mund und Gesicht: Exzision und Destruktion des (erkrankten) harten und weichen Gaumens: Exzision, radikal [En-bloc-Resektion], transmandibulär	Surgeries of the oral cavity and face: Other surgeries of the mouth and face: Excision and destruction of the (diseased) hard and soft palate: Excision, radical [en bloc resection], transmandibular	equal	equal
6	T	oui	6	Z27.56.40	Grossflächig heterologe Hauttransplantation an die Lippe	Large-area heterologous skin graft to the lip	11879	5-908	operationen: Operationen an Haut und Unterhaut: Operative Wiederherstellung und Rekonstruktion von Haut und Unterhaut: Plastische Operation an Lippe und Mundwinkel	operations: Operations on skin and subcutaneous tissue: Surgical restoration and reconstruction of skin and subcutaneous tissue: Plastic surgery on lip and corner of the mouth	equal	equal
6	T	oui	6	Z27.59.31	Grossflächige temporäre Weichteildeckung durch Kombination mehrerer Verfahren an der Lippe	Large-area temporary soft tissue coverage of the lip using a combination of procedures	11940	5-916	operationen: Operationen an Haut und Unterhaut: Andere Operationen an Haut und Unterhaut: Temporäre Weichteildeckung	operations: Operations on skin and subcutaneous tissue: Other operations on skin and subcutaneous tissue: Temporary soft tissue coverage	equal	equivalent
6	T	oui	6	Z29.4X.11	Plastische Rekonstruktion am Pharynx, mit gestieltem myokutanen Lappen	Pharyngeal plastic reconstruction with pedicled myocutaneous flap	4464	5-293.1	operationen: Operationen an Pharynx, Larynx und Trachea: Operationen am Pharynx: Pharyngoplastik: Mit gestieltem myokutanen Lappen	Procedures: Operations on the pharynx, larynx and trachea: Procedures on the pharynx: Pharyngoplasty: With pedicled myocutaneous flap	equal	equal
6	T	oui	6	Z30.29.22	Partielle Laryngektomie frontolaterale (Leroux-Robert)	Partial laryngectomy, frontolateral approach	4535	5-302.7	operationen: Operationen an Pharynx, Larynx und Trachea: Exzision und Resektion am Larynx: Andere partielle Laryngektomie: Teilresektion, frontolateral (Leroux-Robert)	Operations on pharynx, larynx and trachea: Excision and resection of the larynx: Other partial laryngectomy: Partial resection, frontolateral (Leroux-Robert)	equal	equal
4	T	oui	4	Z31.94	Injektion eines Lokaltherapeutikums in die Trachea	Injection of a local anesthetic into the trachea	4653	5-319.b	operationen: Operationen an Pharynx, Larynx und Trachea: Andere Larynxoperationen und Operationen an der Trachea: Andere Operationen an Larynx und Trachea: Endoskopische Injektion in die Trachea	Procedures: Operations on pharynx, larynx and trachea: Other laryngeal operations and tracheal operations: Other operations on larynx and trachea: Endoscopic injection into the trachea	equal	inexact
6	T	oui	6	Z32.01.13	Endoskopische Exzision oder Destruktion von Läsion oder Gewebe an einem Bronchus, Thermoplastie der Bronchialmuskulatur	Endoscopic excision or destruction of a lesion or tissue on a bronchus, thermoplasty of the bronchial musculature	4668	5-320.5	operationen: Operationen an Lunge und Bronchus: Exzision und Resektion an Lunge und Bronchus: Exzision und Destruktion von erkranktem Gewebe eines Bronchus: Bronchoskopische Radiofrequenzablation an der Bronchialmuskulatur	Surgeries on lung and bronchus: Excision and resection of lung and bronchus: Excision and destruction of diseased bronchial tissue: Bronchoscopic radiofrequency ablation of the bronchial musculature	equal	equal
6	T	oui	6	Z32.44.12	Bilobektomie an der Lunge, thorakoskopisch, mit bronchoplastischer Erweiterung	Bilobectomy of the lung, thoracoscopically, with bronchial plastic reconstruction	4872	5-325.6	operationen: Operationen an Lunge und Bronchus: Exzision und Resektion an Lunge und Bronchus: Erweiterte Lobektomie und Bilobektomie der Lunge: Bilobektomie mit bronchoplastischer Erweiterung (Bronchusmanschette)	Operations on lung and bronchus: Excision and resection of lung and bronchus: Extended lobectomy and bilobectomy of the lung: Bilobectomy with bronchial plastic expansion (bronchial cuff)	equal	equivalent
3	T	oui	3	Z33.0	Inzision an einem Bronchus	Incision on a bronchus	4946	5-330	operationen: Operationen an Lunge und Bronchus: Andere Operationen an Lunge und Bronchus: Inzision eines Bronchus	Procedures: Lung and Bronchus Surgeries: Other Lung and Bronchus Surgeries: Bronchial Incision	equal	equal
6	T	oui	6	Z33.23.13	Fluoreszenztracheobronchoskopie	Fluorescence bronchoscopy	967	1-620.2	diagnostische massnahmen: Diagnostische Endoskopie: Diagnostische Tracheobronchoskopie: Diagnostische Tracheobronchoskopie: Mit Autofluoreszenzlicht	Diagnostic measures: Diagnostic endoscopy: Diagnostic tracheobronchoscopy: Diagnostic tracheobronchoscopy: With autofluorescence light	equal	narrower
6	T	oui	6	Z33.71.11	Endoskopisches Einsetzen von Bronchialventil(en), ein Ventil	Endoscopic placement of a bronchial valve, a valve	5012	5-339.52	operationen: Operationen an Lunge und Bronchus: Andere Operationen an Lunge und Bronchus: Andere Operationen an Lunge und Bronchien: Implantation oder Wechsel eines endobronchialen Klappensystems, endoskopisch: 3 Ventile	Surgeries on Lung and Bronchus: Other Surgeries on Lung and Bronchus: Other Surgeries on Lung and Bronchi: Implantation or replacement of an endobronchial valve system, endoscopic: 3 valves	equal	equal
6	T	oui	6	Z33.79.11	Endoskopisches Einsetzen von Gel zur biologischen Lungenvolumenreduktion	Endoscopic placement of gel for biological lung volume reduction	5027	5-339.7	operationen: Operationen an Lunge und Bronchus: Andere Operationen an Lunge und Bronchus: Andere Operationen an Lunge und Bronchien: Einführung von polymerisierendem Hydrogelschaum, bronchoskopisch	Surgeries on Lung and Bronchus: Other Surgeries on Lung and Bronchus: Other Surgeries on Lung and Bronchi: Introduction of Polymerizing Hydrogel Foam, Bronchoscopically	equal	equal
6	T	oui	6	Z34.01.10	Inzision an der Brustwand, Thorakotomie zur Fremdkörperentfernung	Incision on the chest wall, thoracotomy for foreign body removal	5057	5-340.2	operationen: Operationen an Lunge und Bronchus: Operationen an Brustwand, Pleura, Mediastinum und Zwerchfell: Inzision von Brustwand und Pleura: Thorakotomie zur Fremdkörperentfernung	Surgeries: Lung and bronchus surgeries: Surgeries on chest wall, pleura, mediastinum, and diaphragm: Incision of the chest wall and pleura: Thoracotomy for foreign body removal	equal	equal
6	T	oui	6	Z34.3X.24	Resektion von Läsion oder Gewebe des Mediastinums, mit prothetischem Gefässersatz	Resection of lesion or tissue of the mediastinum, with prosthetic vascular graft	5095	5-342.14	operationen: Operationen an Lunge und Bronchus: Operationen an Brustwand, Pleura, Mediastinum und Zwerchfell: Exzision und Destruktion von erkranktem Gewebe des Mediastinums: Resektion: Mit prothetischem Gefäßersatz	operations: Operations on lung and bronchus: Operations on chest wall, pleura, mediastinum, and diaphragm: Excision and destruction of diseased mediastinal tissue: Resection: With prosthetic vascular graft	equal	equal
6	T	oui	6	Z34.52.16	Subtotale Pleurektomie und Dekortikation, thorakoskopisch	Subtotal pleurectomy and decortication, thoracoscopically	5138	5-345.4	operationen: Operationen an Lunge und Bronchus: Operationen an Brustwand, Pleura, Mediastinum und Zwerchfell: Pleurodese [Verödung des Pleuraspaltes]: Mit Dekortikation, thorakoskopisch	Surgeries: Lung and bronchus surgeries: Surgeries on chest wall, pleura, mediastinum, and diaphragm: Pleurisy [sealing of the pleural space]: With decortication, thoracoscopically	equal	equal
4	T	oui	4	Z35.31	Papillarmuskeloperation	Papillary muscle operation	3082	5-10	operationen: Operationen an den Augen: Operationen an den Augenmuskeln	Procedures: Eye surgeries: Eye muscle surgeries	equal	equal
6	T	oui	6	Z35.41.20	Vergrösserung eines bestehenden Vorhofseptumdefekts, perkutan-transluminal	Enlargement of an existing atrial septal defect, percutaneous transluminal	17118	8-837.c0	nicht operative therapeutische massnahmen: Maßnahmen für den Blutkreislauf: Therapeutische Katheterisierung und Kanüleneinlage in Gefäße: Perkutan-transluminale Gefäßintervention an Herz und Koronargefäßen: Vergrößerung eines Septumdefektes: Vorhofseptum	Non-operative therapeutic measures: Measures for the circulatory system: Therapeutic catheterization and cannulation into vessels: Percutaneous transluminal intervention of heart and coronary arteries: Enlargement of a septal defect: Atrial septum	equal	equal
4	T	oui	4	Z35.54	Korrektur von Endokardkissendefekten (AV-Kanal) mit Prothese	Repair of endocardial defects with prosthesis	5241	5-352	operationen: Operationen am Herzen: Operationen an Klappen und Septen des Herzens und herznaher Gefäße: Wechsel von Herzklappenprothesen	Procedures: Cardiac surgeries: Surgeries on valves and septa of the heart and nearby blood vessels: Replacement of heart valve prostheses	equal	wider
6	T	oui	6	Z35.F1.51	Aortenklappenersatz durch mechanische Prothese, über vollständige Sternotomie	Aortic valve replacement with a mechanical prosthesis, via full sternotomy	5236	5-351.2	operationen: Operationen am Herzen: Operationen an Klappen und Septen des Herzens und herznaher Gefäße: Ersatz von Herzklappen durch Prothese: Mitralklappe, thorakoskopisch	Procedures: Cardiac surgeries: Surgeries on valves and septa of the heart and nearby blood vessels: Replacement of heart valves with prostheses: Mitral valve, thoracoscopically	equal	equal
6	T	oui	6	Z36.03.00	Koronarangioplastik am offenen Thorax, n.n.bez.	Open-chest coronary angioplasty, indication unspecified	5446	5-363.y	operationen: Operationen am Herzen: Operationen an den Koronargefäßen: Andere Revaskularisation des Herzens: Nicht näher bezeichnet	operations: Cardiac surgeries: Coronary artery bypass grafting: Other cardiac revascularization: Not specified	equal	equivalent
6	T	oui	6	Z36.08.24	Implantation perkutan-transluminal von selbstexpandierenden Stents mit Medikamentenfreisetzung, in mehreren Koronararterien	Percutaneous transluminal implantation of drug-eluting self-expanding stents in multiple coronary arteries	17526	8-83d.24	nicht operative therapeutische massnahmen: Maßnahmen für den Blutkreislauf: Therapeutische Katheterisierung und Kanüleneinlage in Gefäße: Andere perkutan-transluminale Gefäßintervention an Herz und Koronargefäßen: Einlegen eines medikamentefreisetzenden selbstexpandierenden Stents: 3 selbstexpandierende Stents in mehrere Koronararterien	Non-operative therapeutic measures: Measures for the circulatory system: Therapeutic catheterization and cannulation into vessels: Other percutaneous transluminal interventions on heart and coronary arteries: Implantation of a drug-eluting self-expanding stent: 3 self-expanding stents in multiple coronary arteries	equal	equal
6	T	oui	6	Z36.11.31	Einfacher (aorto)koronarer Bypass, minimalinvasiv, mit autogener Arterie, A. radialis	Simple coronary bypass, minimally invasive, with autologous artery, radial artery	5417	5-362.0	operationen: Operationen am Herzen: Operationen an den Koronargefäßen: Anlegen eines aortokoronaren Bypass durch minimalinvasive Technik: Bypass einfach, durch Sternotomie	Procedures: Cardiac surgeries: Coronary artery bypass grafting: Aortic coronary bypass using minimally invasive technique: Bypass via simple sternotomy	equal	equal
4	T	oui	4	Z36.91	Korrektur eines Koronargefäss-Aneurysmas	Correction of a coronary artery aneurysm	5460	5-369.1	operationen: Operationen am Herzen: Operationen an den Koronargefäßen: Andere Operationen an den Koronargefäßen: Korrektur eines Aneurysmas	Procedures: Cardiac surgeries: Coronary artery bypass grafting: Other coronary artery procedures: Aneurysm repair	equal	narrower
4	T	oui	4	Z37.21	Rechtsherzkatheter	Right heart catheter	131	1-273	diagnostische massnahmen: Untersuchung einzelner Körpersysteme: Diagnostische Katheteruntersuchung an Herz und Kreislauf: Rechtsherz-Katheteruntersuchung	Diagnostic measures: Examination of individual body systems: Diagnostic catheter examination of heart and circulatory system: Right heart catheterization	equal	equal
6	T	oui	6	Z37.51.10	Herztransplantation	Heart transplantation	5543	5-375	operationen: Operationen am Herzen: Rhythmuschirurgie und andere Operationen an Herz und Perikard: Herz- und Herz-Lungen-Transplantation	Procedures: Cardiac surgery: Arrhythmia surgery and other operations on the heart and pericardium: Heart and heart-lung transplantation	equal	equal
6	T	oui	6	Z37.69.1H	Dauer der Behandlung mit einer intraaortalen Ballonpumpe, von mehr als 432 Stunden bis 480 Stunden	Duration of treatment with an intra-aortic balloon pump, from more than 432 hours to 480 hours	17255	8-83a.01	nicht operative therapeutische massnahmen: Maßnahmen für den Blutkreislauf: Therapeutische Katheterisierung und Kanüleneinlage in Gefäße: Dauer der Behandlung mit einem herzunterstützenden System: Intraaortale Ballonpumpe: 48 bis unter 96 Stunden	Non-operative therapeutic measures: Measures for the circulatory system: Therapeutic catheterization and cannulation of vessels: Duration of treatment with a supportive system: Intra-aortic balloon pump: 48 to less than 96 hours	equal	equal
6	T	oui	6	Z37.69.81	Dauer der Behandlung mit einem herzkreislauf- und lungenunterstützenden System, mit Pumpe, mit Oxygenator (inkl. CO2-removal), extrakorporal, veno-venös, von mehr als 24 Stunden bis 48 Stunden	Duration of treatment with a cardiopulmonary support system, with pump, oxygenator, extracorporeal, veno-venous, from more than 24 hours to 48 hours.	17298	8-83a.46	nicht operative therapeutische massnahmen: Maßnahmen für den Blutkreislauf: Therapeutische Katheterisierung und Kanüleneinlage in Gefäße: Dauer der Behandlung mit einem herzunterstützenden System: Parakorporale Pumpe zur Kreislaufunterstützung (z.B. Membranpumpe): 288 bis unter 384 Stunden	Non-operative therapeutic measures: Measures for the circulatory system: Therapeutic catheterization and cannulation into vessels: Duration of treatment with a supportive system: Extracorporeal pump for circulatory support (e.g., membrane pump): 288 to less than 384 hours	equal	equal
6	T	oui	6	Z37.75.32	Revision ohne Ersatz einer transvenösen Vorhof- und Ventrikelelektrode	Revision without replacement of a transvenous atrial and ventricular electrode	2717	5-059.e	operationen: Operationen am Nervensystem: Andere Operationen an Nerven und Nervenganglien: Andere Operationen an Nerven und Ganglien: Isolierter Wechsel des Sensors in der rechten Herzkammer bei einem kardialen Vagusnervstimulationssystem	Isolated sensor replacement in the right ventricle for a cardiac vagus nerve stimulation system.	equal	equal
6	T	oui	6	Z37.8A.42	Implantation eines transvenösen, sondenlosen Herzschrittmachers, Einkammerstimulation	Implantation of a transvenous, leadless cardiac pacemaker, single-chamber pacing	2717	5-059.e	operationen: Operationen am Nervensystem: Andere Operationen an Nerven und Nervenganglien: Andere Operationen an Nerven und Ganglien: Isolierter Wechsel des Sensors in der rechten Herzkammer bei einem kardialen Vagusnervstimulationssystem	Isolated sensor replacement in the right ventricle for a cardiac vagus nerve stimulation system.	equal	equal
6	T	oui	6	Z37.8F.12	Entfernen eines Zweikammer-Defibrillators	Removal of a dual-chamber defibrillator	5642	5-378.0	operationen: Operationen am Herzen: Rhythmuschirurgie und andere Operationen an Herz und Perikard: Entfernung, Wechsel und Korrektur eines Herzschrittmachers und Defibrillators: Aggregatentfernung	Procedures: Cardiac surgeries: Arrhythmia surgery and other surgeries on the heart and pericardium: Removal, replacement, and correction of a pacemaker and defibrillator: Device removal	equal	equal
6	T	oui	6	Z38.16.16	Endarteriektomie der A. mesenterialis	Mesenteric artery endarterectomy	7748	5-543.1	operationen: Operationen am Verdauungstrakt: Andere Operationen in der Bauchregion: Exzision und Destruktion von peritonealem Gewebe: Mesenteriumresektion	Procedures: Procedures on the digestive tract: Other procedures in the abdominal region: Excision and destruction of peritoneal tissue: Mesentery resection	equal	equal
6	T	oui	6	Z38.32.10	Resektion von extrakraniellen Arterien an Kopf und Hals mit Anastomose	Resection of extracranial arteries in the head and neck with anastomosis	5939	5-393.0	operationen: Operationen an den Blutgefäßen: Andere Operationen an Blutgefäßen und Zusatzinformationen zu Operationen an Blutgefäßen: Anlegen eines anderen Shuntes und Bypasses an Blutgefäßen: Arterien Kopf, extrakraniell, und Hals	Procedures: Vascular procedures: Other vascular procedures and additional information on vascular procedures: Placement of another shunt and bypass in blood vessels: Head arteries, extracranial, and neck	equal	equal
6	T	oui	6	Z38.47.19	Resektion von tiefen abdominalen Venen mit Ersatz, sonstige	Resection of deep abdominal veins with replacement, other	5772	5-384	operationen: Operationen an den Blutgefäßen: Inzision, Exzision und Verschluss von Blutgefäßen: Resektion und Ersatz (Interposition) an der Aorta	Operations on blood vessels: Incision, excision and ligation of blood vessels: Resection and replacement (interposition) at the aorta.	equal	equal
6	T	oui	6	Z38.7X.11	Einsetzen eines Embolie-Protektionssystems in die Vena cava, offen chirurgisch	Placement of an embolus protection system in the inferior vena cava, open surgically	6049	5-39a.0	operationen: Operationen an den Blutgefäßen: Andere Operationen an Blutgefäßen und Zusatzinformationen zu Operationen an Blutgefäßen: Zusatzinformationen zu Operationen an Blutgefäßen: Intraoperative Anwendung eines Embolieprotektionssystems	Procedures: Vascular procedures: Other vascular procedures and additional information on vascular procedures: Additional information on vascular procedures: Intraoperative use of an embolus protection system	equal	narrower
6	T	oui	6	Z38.93.11	Implantation und Wechsel eines venösen Katheterverweilsystems für Langzeitanwendung	Implantation and exchange of a venous catheter system for long-term use	16949	8-831.22	nicht operative therapeutische massnahmen: Maßnahmen für den Blutkreislauf: Therapeutische Katheterisierung und Kanüleneinlage in Gefäße: Legen und Wechsel eines Katheters in periphere und zentralvenöse Gefäße: Wechsel: Über eine periphere Vene in ein zentralvenöses Gefäß	Non-operative therapeutic measures: Measures for the circulatory system: Therapeutic catheterization and cannulation of vessels: Insertion and exchange of a catheter into peripheral and central venous vessels: Exchange: Through a peripheral vein into a central venous vessel	equal	equal
4	T	oui	4	Z38.98	Sonstige Arterienpunktion	Other arterial punctures	5895	5-39	operationen: Operationen an den Blutgefäßen: Andere Operationen an Blutgefäßen und Zusatzinformationen zu Operationen an Blutgefäßen	Procedures: Vascular procedures: Other vascular procedures and additional information on vascular procedures	equal	equal
6	T	oui	6	Z39.22.13	Bypass zwischen A. carotis und A. subclavia	Bypass between the carotid artery and the subclavian artery	5942	5-393.02	operationen: Operationen an den Blutgefäßen: Andere Operationen an Blutgefäßen und Zusatzinformationen zu Operationen an Blutgefäßen: Anlegen eines anderen Shuntes und Bypasses an Blutgefäßen: Arterien Kopf, extrakraniell, und Hals: Arteria carotis - Arteria subclavia	Procedures: Vascular procedures: Other vascular procedures and additional information on vascular procedures: Placement of another shunt and bypass in blood vessels: Head arteries, extracranial, and neck: Carotid artery - Subclavian artery	equal	equal
6	T	oui	6	Z39.29.81	Temporärer intraoperativer Shunt, arterioarteriell	Temporary intraoperative shunt, arterial-arterial	5927	5-392.4	operationen: Operationen an den Blutgefäßen: Andere Operationen an Blutgefäßen und Zusatzinformationen zu Operationen an Blutgefäßen: Anlegen eines arteriovenösen Shuntes: Temporärer Shunt (intraoperativ)	Procedures: Vascular procedures: Other vascular procedures and additional information on vascular procedures: Creation of an arteriovenous shunt: Temporary shunt (intraoperative)	equal	equal
6	T	oui	6	Z39.56.21	Plastische Rekonstruktion von Arterien der oberen Extremität mit Gewebe-Patch	Plastic reconstruction of arteries in the upper extremity with tissue patch	11863	5-906	operationen: Operationen an Haut und Unterhaut: Operative Wiederherstellung und Rekonstruktion von Haut und Unterhaut: Kombinierte plastische Eingriffe an Haut und Unterhaut	operations: Operations on skin and subcutaneous tissue: Surgical restoration and reconstruction of skin and subcutaneous tissue: Combined plastic procedures on skin and subcutaneous tissue	equal	equal
6	T	oui	6	Z39.59.11	Transposition der extrakraniellen A. vertebralis	Transposition of the extracranial vertebral artery	2115	5-027.1	operationen: Operationen am Nervensystem: Andere Operationen an Schädel, Gehirn und Hirnhäuten: Anlegen eines Bypasses und Transposition von intrakraniellen Blutgefäßen: Extra-intrakranieller Bypass mit Interponat	Procedures: Neurosurgical procedures: Other procedures on skull, brain and meninges: Placement of a bypass and transposition of intracranial blood vessels: Extracranial bypass with interposition	equal	equal
6	T	oui	6	Z39.59.48	Sonstige plastische Rekonstruktion von sonstigen tiefen Venen der oberen Extremität	Other plastic reconstruction of other deep veins in the upper extremity	6020	5-397	operationen: Operationen an den Blutgefäßen: Andere Operationen an Blutgefäßen und Zusatzinformationen zu Operationen an Blutgefäßen: Andere plastische Rekonstruktion von Blutgefäßen	Procedures: Vascular procedures: Other vascular procedures and additional information on vascular procedures: Other reconstructive plastic surgery of blood vessels	equal	equal
6	T	oui	6	Z39.61.15	Konventionelle extrakorporelle Zirkulation [ECC] unter Hypothermie, unbekannte Temperatur	Conventional extracorporeal circulation [ECC] under hypothermia, unknown temperature	17624	8-851.3	nicht operative therapeutische massnahmen: Maßnahmen für den Blutkreislauf: Extrakorporale Zirkulation und Behandlung von Blut: Operativer äußerer Kreislauf (bei Anwendung der Herz-Lungen-Maschine): Mit moderater Hypothermie (26 bis unter 32 °C)	Non-operative therapeutic measures: Measures for the circulatory system: Extracorporeal circulation and blood treatment: Surgical external circulation (when using a heart-lung machine): With moderate hypothermia (26 to below 32°C)	equal	equal
6	T	oui	6	Z39.72.25	Selektive Embolisation von extrakraniellen Gefässen des Kopfes und des Halses mit Plugs	Selective embolization of extracranial vessels of the head and neck with plugs	5939	5-393.0	operationen: Operationen an den Blutgefäßen: Andere Operationen an Blutgefäßen und Zusatzinformationen zu Operationen an Blutgefäßen: Anlegen eines anderen Shuntes und Bypasses an Blutgefäßen: Arterien Kopf, extrakraniell, und Hals	Procedures: Vascular procedures: Other vascular procedures and additional information on vascular procedures: Placement of another shunt and bypass in blood vessels: Head arteries, extracranial, and neck	equal	equal
6	T	oui	6	Z39.73.31	Endovaskuläre Implantation in die Aorta thoracica von Stent-Grafts [Stent-Prothesen], ohne Öffnung	Endovascular implantation of stent-grafts (stent prostheses) into the thoracic aorta without an incision	5841	5-38a.70	operationen: Operationen an den Blutgefäßen: Inzision, Exzision und Verschluss von Blutgefäßen: Endovaskuläre Implantation von Stent-Prothesen: Aorta thoracica: Stent-Prothese, ohne Öffnung	Procedures: Vascular surgery: Incision, excision and ligation of blood vessels: Endovascular stent graft implantation: Thoracic aorta: Stent graft, without fenestration	equal	equivalent
6	T	oui	6	Z39.76.30	Perkutane Laserangioplastie an präzerebralem(en) (extrakraniellem(en)) Gefäss(en)	Percutaneous laser angioplasty of a precerebral (extracranial) vessel	17085	8-837.1	nicht operative therapeutische massnahmen: Maßnahmen für den Blutkreislauf: Therapeutische Katheterisierung und Kanüleneinlage in Gefäße: Perkutan-transluminale Gefäßintervention an Herz und Koronargefäßen: Laser-Angioplastie	Non-operative therapeutic measures: Measures for the circulatory system: Therapeutic catheterization and cannulation of vessels: Percutaneous transluminal intervention on heart and coronary arteries: Laser angioplasty	equal	equal
6	T	oui	6	Z39.77.70	Perkutane endovaskuläre Fremdkörperentfernung aus intrakraniellem(n) Gefäss(en)	Percutaneous Endovascular Foreign Body Removal from Intracranial Vessels	17091	8-837.4	nicht operative therapeutische massnahmen: Maßnahmen für den Blutkreislauf: Therapeutische Katheterisierung und Kanüleneinlage in Gefäße: Perkutan-transluminale Gefäßintervention an Herz und Koronargefäßen: Fremdkörperentfernung	Non-operative therapeutic measures: Measures for the circulatory system: Therapeutic catheterization and cannulation of vessels: Percutaneous transluminal intervention of heart and coronary arteries: Foreign body removal	equal	equal
6	T	oui	6	Z39.79.25	Coil-Embolisation oder -Verschluss von viszeralen Gefässen	Coil embolization or occlusion of visceral vessels	5766	5-38...5-39	operationen: Operationen an den Blutgefäßen	Procedures on blood vessels	equal	equal
6	T	oui	6	Z39.95.21	Hämodialyse: Intermittierend, Antikoagulation mit Heparin oder ohne Antikoagulation	Hemodialysis: Intermittent, anticoagulation with heparin or without anticoagulation	17735	8-854.2	nicht operative therapeutische massnahmen: Maßnahmen für den Blutkreislauf: Extrakorporale Zirkulation und Behandlung von Blut: Hämodialyse: Intermittierend, Antikoagulation mit Heparin oder ohne Antikoagulation	Non-operative therapeutic measures: Measures for the circulatory system: Extracorporeal circulation and blood treatment: Hemodialysis: Intermittent, with or without heparin anticoagulation	equal	equal
6	T	oui	6	Z39.99.31	Katheterinterventioneller Verschluss des Ductus arteriosus Botalli, mit Coil	Catheter-based closure of the ductus arteriosus Botalli with coil	184	1-279.6	diagnostische massnahmen: Untersuchung einzelner Körpersysteme: Diagnostische Katheteruntersuchung an Herz und Kreislauf: Andere diagnostische Katheteruntersuchung an Herz und Gefäßen: Sondierung des Ductus arteriosus Botalli	Diagnostic measures: Examination of individual body systems: Diagnostic catheter examination of the heart and circulatory system: Other diagnostic catheter examination of the heart and vessels: Ductus arteriosus Botalli probing	equal	equal
6	T	oui	6	Z39.9A.22	Implantation oder Wechsel einer vollständig implantierbaren Infusionspumpe zur intravenösen Infusion mit programmierbarem variablem Tagesprofil	Implantation or exchange of a fully implantable infusion pump for intravenous infusion with a programmable, variable daily profile	6039	5-399.b1	operationen: Operationen an den Blutgefäßen: Andere Operationen an Blutgefäßen und Zusatzinformationen zu Operationen an Blutgefäßen: Andere Operationen an Blutgefäßen: Implantation oder Wechsel einer implantierbaren Medikamentenpumpe (z.B. zur Chemotherapie oder zur Schmerztherapie): Programmierbare Medikamentenpumpe mit kontinuierlicher Abgabe bei variablem Tagesprofil	Procedures: Vascular procedures: Other vascular procedures and additional information on vascular procedures: Other vascular procedures: Implantation or exchange of an implantable drug pump (e.g., for chemotherapy or pain therapy): Programmable drug pump with continuous delivery at a variable daily profile	equal	equal
6	T	oui	6	Z39.B4.M1	(Perkutan-)transluminale Implantation von gecoverten Stents mit Medikamentenfreisetzung, Gefässmalformationen	Transluminal implantation of drug-eluting covered stents, vascular malformations	17582	8-848.0	nicht operative therapeutische massnahmen: Maßnahmen für den Blutkreislauf: (Perkutan-)transluminale Stentimplantation: (Perkutan-)transluminale Implantation von medikamentefreisetzenden gecoverten Stents (Stent-Graft): Ein Stent	Non-operative therapeutic measures: Measures for the circulatory system: (Percutaneous-) transluminal stent implantation: (Percutaneous-) transluminal implantation of drug-eluting covered stents (stent graft): A stent	equal	equal
6	T	oui	6	Z40.3X.09	Exzision von regionalen Lymphknoten, sonstige	Excision of regional lymph nodes, other	6229	5-406.y	operationen: Operationen am hämatopoetischen und Lymphgefäßsystem: Operationen am Lymphgewebe: Regionale Lymphadenektomie (Ausräumung mehrerer Lymphknoten einer Region) im Rahmen einer anderen Operation: Nicht näher bezeichnet	Operations on the hematopoietic and lymphatic system: Operations on lymph tissue: Regional lymphadenectomy (removal of multiple lymph nodes in a region) as part of another operation: Not further specified	equal	equal
6	T	oui	6	Z40.51.11	Radikale Exzision von axillären Lymphknoten im Rahmen eines anderen Eingriffs	Radical excision of axillary lymph nodes as part of another procedure	6233	5-407.01	operationen: Operationen am hämatopoetischen und Lymphgefäßsystem: Operationen am Lymphgewebe: Radikale (systematische) Lymphadenektomie im Rahmen einer anderen Operation: Axillär: Level 1	Procedures: Procedures on the hematopoietic and lymphatic system: Procedures on lymph tissue: Radical (systematic) lymphadenectomy as part of another operation: Axillary: Level 1	equal	equal
4	T	oui	4	Z40.62	Fistulierung des Ductus thoracicus	Thoracodorsal duct fistulization	6206	5-405.1	operationen: Operationen am hämatopoetischen und Lymphgefäßsystem: Operationen am Lymphgewebe: Operationen am Ductus thoracicus: Verschluss einer Chylusfistel, thorakoskopisch	Procedures: Procedures on the hematopoietic and lymphatic system: Procedures on lymph tissue: Procedures on the thoracic duct: Closure of a chylo fistula, thoracoscopically	equal	inexact
6	T	oui	6	Z41.0A.11	Hämatopoetische Stammzellentnahme aus dem Knochenmark, autolog	Autologous hematopoietic stem cell harvest from bone marrow	6279	5-410.10	operationen: Operationen am hämatopoetischen und Lymphgefäßsystem: Operationen an Milz und Knochenmark: Entnahme von hämatopoetischen Stammzellen aus Knochenmark und peripherem Blut zur Transplantation und von peripheren Blutzellen zur Transfusion: Hämatopoetische Stammzellen aus peripherem Blut: Zur Eigenspende	Operations on the hematopoietic and lymphatic system: Operations on spleen and bone marrow: Harvesting of hematopoietic stem cells from bone marrow and peripheral blood for transplantation and of peripheral blood cells for transfusion: Hematopoietic stem cells from peripheral blood: For autologous donation	equal	equal
6	T	oui	6	Z41.0E.12	Entnahme von T-Zellen, autolog, zur In-vitro-Kultur und tumorspezifischen In-vitro-Aufbereitung von CAR-T-Zellen	Harvesting of T cells, autologous, for in vitro culture and tumor-specific in vitro preparation of CAR-T cells	6287	5-410.30	operationen: Operationen am hämatopoetischen und Lymphgefäßsystem: Operationen an Milz und Knochenmark: Entnahme von hämatopoetischen Stammzellen aus Knochenmark und peripherem Blut zur Transplantation und von peripheren Blutzellen zur Transfusion: Periphere Blutzellen, Lymphozyten: Autogen, T-Zellen zur Ex-vivo-Kultur und tumorspezifischen In-vitro-Aufbereitung	Procedures: Operations on the hematopoietic and lymphatic system: Operations on spleen and bone marrow: Harvesting of hematopoietic stem cells from bone marrow and peripheral blood for transplantation and of peripheral blood cells for transfusion: Peripheral blood cells, lymphocytes: Autologous, T-cells for ex vivo culture and tumor-specific in vitro processing	equal	equal
4	T	oui	4	Z41.43	Partielle Splenektomie	Partial splenectomy	6317	5-413.0	operationen: Operationen am hämatopoetischen und Lymphgefäßsystem: Operationen an Milz und Knochenmark: Splenektomie: Partiell	Operations on the hematopoietic and lymphatic system: Operations on spleen and bone marrow: Splenectomy: Partial	equal	equal
4	T	oui	4	Z42.22	Ösophagoskopie durch ein künstliches Stoma	Esophagoscopy through an artificial stoma	1001	1-638	diagnostische massnahmen: Diagnostische Endoskopie: Diagnostische Endoskopie des oberen Verdauungstraktes: Diagnostische Endoskopie des oberen Verdauungstraktes über ein Stoma	Diagnostic measures: Diagnostic endoscopy: Upper gastrointestinal endoscopy: Upper gastrointestinal endoscopy via a stoma	equal	equal
6	T	oui	6	Z42.33.20	Endoskopische Exzision oder Destruktion von Läsion oder Gewebe am Ösophagus, Elektro-, Thermo- und Kryoablation	Endoscopic excision or destruction of lesions or tissue in the esophagus, including electro-, thermo-, and cryotherapy ablation	6361	5-422.5	operationen: Operationen am Verdauungstrakt: Operationen am Ösophagus: Lokale Exzision und Destruktion von erkranktem Gewebe des Ösophagus: Destruktion, endoskopisch	Procedures: Procedures on the digestive tract: Procedures on the esophagus: Local excision and destruction of diseased esophageal tissue: Endoscopic destruction	equal	equal
4	T	oui	4	Z42.52	Intrathorakale Ösophagogastrostomie	Intra-thoracic esophagogastrostomy	6378	5-424.12	operationen: Operationen am Verdauungstrakt: Operationen am Ösophagus: Partielle Ösophagusresektion mit Wiederherstellung der Kontinuität: Thorakoabdominal: Mit proximaler Magenresektion (Kardia und Fundus) und Hochzug des Restmagens, durch Thorakotomie	Procedures: Procedures on the digestive tract: Procedures on the esophagus: Partial esophagectomy with restoration of continuity: Thoracoabdominal: With proximal gastric resection (cardia and fundus) and elevation of the remaining stomach via thoracotomy	equal	equal
6	T	oui	6	Z42.81.10	Einsetzen und Wechsel einer nicht selbstexpandierenden Prothese (permanenter Tubus) in den Ösophagus, endoskopisch	Insertion and exchange of a non-self-expanding prosthesis in the esophagus, endoscopically	6446	5-429.k1	operationen: Operationen am Verdauungstrakt: Operationen am Ösophagus: Andere Operationen am Ösophagus: Maßnahmen bei nicht selbstexpandierender Prothese: Einlegen oder Wechsel, endoskopisch	Procedures: Procedures on the digestive tract: Procedures on the esophagus: Other procedures on the esophagus: Measures for non-self-expanding prosthesis: Insertion or exchange, endoscopically	equal	wider
6	T	oui	6	Z42.88.11	Entfernung von Prothesen aus dem Ösophagus, offen chirurgisch	Removal of prosthesis from esophagus, open surgical	6686	5-449.j	operationen: Operationen am Verdauungstrakt: Andere Operationen am Magen: Andere Operationen am Magen: Entfernung einer selbstexpandierenden Prothese	Procedures: Procedures on the digestive tract: Other procedures on the stomach: Other procedures on the stomach: Removal of a self-expanding prosthesis	equal	equal
6	T	oui	6	Z42.99.41	Schlingenligatur und Clipping am Ösophagus, endoskopisch	Esophageal ligation and clipping, endoscopic	6425	5-429.d	operationen: Operationen am Verdauungstrakt: Operationen am Ösophagus: Andere Operationen am Ösophagus: Endoskopisches Clippen	Procedures: Procedures on the digestive tract: Procedures on the esophagus: Other procedures on the esophagus: Endoscopic clipping	equal	equal
6	T	oui	6	Z43.6X.10	Pylorusresektion mit Anastomose zum Duodenum	Pyloric resection with anastomosis to the duodenum	6503	5-432	operationen: Operationen am Verdauungstrakt: Inzision, Exzision und Resektion am Magen: Operationen am Pylorus	Procedures: Gastrointestinal surgeries: Incision, excision, and resection of the stomach: Procedures at the pylorus	equal	equal
6	T	oui	6	Z43.89.21	Biliopankreatische Diversion des Magens nach Scopinaro, laparoskopisch	Bilioenteric diversion of the stomach after Scopinaro, laparoscopically	6537	5-434.3	operationen: Operationen am Verdauungstrakt: Inzision, Exzision und Resektion am Magen: Atypische partielle Magenresektion: Biliopankreatische Diversion nach Scopinaro	Procedures: Gastrointestinal surgeries: Incision, excision and resection of the stomach: Atypical partial gastric resection: Scopinaro biliary pancreatic diversion	equal	inexact
6	T	oui	6	Z43.89.42	Sleeve resection nach Magenband, offen chirurgisch	Sleeve resection after gastric banding, open surgery	6624	5-447.90	operationen: Operationen am Verdauungstrakt: Andere Operationen am Magen: Revision nach Magenresektion: Umwandlung eines Schlauchmagens in einen Magenbypass durch Transsektion und Blindverschluss des Schlauchmagens und Gastrojejunostomie mit Roux-Y-Anastomose: Offen chirurgisch	Procedures: Procedures on the digestive tract: Other stomach procedures: Revision after gastric resection: Conversion of a sleeve gastrectomy to a gastric bypass by transection and blind closure of the sleeve gastrectomy and gastrojejunostomy with Roux-Y anastomosis: Open surgery	equal	equal
4	T	oui	4	Z44.14	Geschlossene [endoskopische] Biopsie am Magen	Closed [endoscopic] biopsy of the stomach	385	1-440.9	diagnostische massnahmen: Biopsie ohne Inzision: Biopsie ohne Inzision an den Verdauungsorganen: Endoskopische Biopsie an oberem Verdauungstrakt, Gallengängen und Pankreas: Stufenbiopsie am oberen Verdauungstrakt	Diagnostic measures: Biopsy without incision: Endoscopic biopsy of the upper gastrointestinal tract, biliary tract, and pancreas: Stage biopsy of the upper gastrointestinal tract.	equal	equal
6	T	oui	6	Z44.31.15	Proximaler Magenbypass nach Gastric Banding, nach bariatrischem Voreingriff, offen chirurgisch	Proximal gastric bypass after gastric banding, after bariatric surgery, open surgical procedure	6632	5-447.b0	operationen: Operationen am Verdauungstrakt: Andere Operationen am Magen: Revision nach Magenresektion: Umwandlung eines Ein-Anastomosen-Magenbypasses in einen Magenbypass mit Roux-Y-Anastomose: Offen chirurgisch	Procedures: Procedures on the digestive tract: Other procedures on the stomach: Revision after gastric resection: Conversion of a single anastomosis gastric bypass to a Roux-Y gastric bypass: Open surgery	equal	equal
6	T	oui	6	Z44.65.10	Ösophagogastroplastik, Kardiaplastik, offen chirurgisch	Esophageal gastric plastic surgery, cardiac plastic surgery, open surgical	6649	5-448.3	operationen: Operationen am Verdauungstrakt: Andere Operationen am Magen: Andere Rekonstruktion am Magen: Kardiaplastik (z.B. nach Belsey)	Procedures: Gastrointestinal procedures: Other stomach surgeries: Other stomach reconstructions: Cardiac plastic surgery (e.g., after Belsey)	equal	inexact
6	T	oui	6	Z44.96.14	Bandwechsel nach Gastric Banding, laparoskopisch	Band exchange after gastric banding, laparoscopic	6663	5-448.e	operationen: Operationen am Verdauungstrakt: Andere Operationen am Magen: Andere Rekonstruktion am Magen: Entfernung eines Magenbandes	Procedures: Procedures on the digestive tract: Other stomach procedures: Other stomach reconstructions: Removal of a gastric band	equal	equal
4	T	oui	4	Z45.01	Inzision am Duodenum	Duodenal incision	6719	5-450.0	operationen: Operationen am Verdauungstrakt: Inzision, Exzision, Resektion und Anastomose an Dünn- und Dickdarm: Inzision des Darmes: Duodenum	Procedures: Gastrointestinal procedures: Incision, excision, resection and anastomosis of small and large intestine: Intestinal incision: duodenum	equal	equivalent
4	T	oui	4	Z45.12	Endoskopie am Dünndarm durch ein künstliches Stoma	Endoscopy of the small intestine through an artificial stoma	1030	1-652	diagnostische massnahmen: Diagnostische Endoskopie: Diagnostische Endoskopie des unteren Verdauungstraktes: Diagnostische Endoskopie des Darmes über ein Stoma	Diagnostic measures: Diagnostic endoscopy: Diagnostic endoscopy of the lower gastrointestinal tract: Diagnostic endoscopy of the bowel through a stoma	equal	equal
6	T	oui	6	Z45.30.10	Endoskopische Mukosaresektion im Duodenum	Endoscopic mucosal resection in the duodenum	6719	5-450.0	operationen: Operationen am Verdauungstrakt: Inzision, Exzision, Resektion und Anastomose an Dünn- und Dickdarm: Inzision des Darmes: Duodenum	Procedures: Gastrointestinal procedures: Incision, excision, resection and anastomosis of small and large intestine: Intestinal incision: duodenum	equal	equal
6	T	oui	6	Z45.41.09	Lokale Exzision von Läsion oder Gewebe im Dickdarm, sonstige	Local excision of lesion or tissue in the colon, other	6803	5-452.x	operationen: Operationen am Verdauungstrakt: Inzision, Exzision, Resektion und Anastomose an Dünn- und Dickdarm: Lokale Exzision und Destruktion von erkranktem Gewebe des Dickdarmes: Sonstige	Procedures: Gastrointestinal procedures: Incision, excision, resection and anastomosis of small and large intestine: Local excision and destruction of diseased colonic tissue: Other	equal	equal
4	T	oui	4	Z45.51	Isolation eines Dünndarmsegments	Isolation of a small bowel segment	6813	5-454.1	operationen: Operationen am Verdauungstrakt: Inzision, Exzision, Resektion und Anastomose an Dünn- und Dickdarm: Resektion des Dünndarmes: Segmentresektion des Jejunums	Procedures: Gastrointestinal procedures: Incision, excision, resection and anastomosis of small and large intestine: Small bowel resection: Segmentectomy of the jejunum	equal	equal
6	T	oui	6	Z45.72.11	Ileozäkale Resektion, offen chirurgisch	Ileocolic resection, open surgical	6828	5-455.31	operationen: Operationen am Verdauungstrakt: Inzision, Exzision, Resektion und Anastomose an Dünn- und Dickdarm: Partielle Resektion des Dickdarmes: Zäkumresektion: Offen chirurgisch	Procedures: Gastrointestinal surgeries: Incision, excision, resection and anastomosis of small and large intestine: Partial resection of the colon: Colectomy: Open surgery	equal	inexact
6	T	oui	6	Z45.75.21	Hemikolektomie links mit Sigmoidektomie, offen chirurgisch	Left hemicolectomy with sigmoid colectomy, open surgical	6833	5-455.6	operationen: Operationen am Verdauungstrakt: Inzision, Exzision, Resektion und Anastomose an Dünn- und Dickdarm: Partielle Resektion des Dickdarmes: Resektion des Colon descendens mit linker Flexur [Hemikolektomie links]	Procedures: Gastrointestinal surgeries: Incision, excision, resection and anastomosis of small and large intestine: Partial resection of the colon: Resection of the descending colon with left flexure [left hemicolectomy]	equal	equivalent
6	T	oui	6	Z46.15.12	Doppelläufige Kolostomie, laparoskopisch	Double-barrel colostomy, laparoscopic	6860	5-460.2	operationen: Operationen am Verdauungstrakt: Andere Operationen an Dünn- und Dickdarm: Anlegen eines Enterostomas, doppelläufig, als selbständiger Eingriff: Aszendostoma	Procedures: Gastrointestinal procedures: Other procedures on small and large intestine: Creation of a double-barrel enterostomy as an independent procedure: Ascending colostomy	equal	equal
6	T	oui	6	Z46.41.10	Plastische Erweiterung oder Einengung eines Dünndarm-Stomas	Plastic widening or narrowing of a small bowel stoma	6897	5-464.1	operationen: Operationen am Verdauungstrakt: Andere Operationen an Dünn- und Dickdarm: Revision und andere Eingriffe an einem Enterostoma: Plastische Einengung	Procedures: Gastrointestinal procedures: Other procedures on small and large intestine: Revision and other interventions at a stoma: Plastic narrowing	equal	equal
6	T	oui	6	Z46.42.21	Plastische Rekonstruktion einer Parastomalhernie, laparoskopisch, ohne Implantation von Membranen oder Netzen	Plastic reconstruction of a parastomal hernia, laparoscopic, without implantation of membranes or meshes	9126	5-693	operationen: Operationen an den weiblichen Genitalorganen: Andere Operationen am Uterus und Operationen an den Parametrien: Plastische Rekonstruktion der Parametrien (bei Lagekorrektur des Uterus)	Operations on female genital organs: Other operations on the uterus and operations on the parametria: Plastic reconstruction of the parametria (in case of uterine repositioning)	equal	equal
6	T	oui	6	Z46.74.12	Verschluss einer Dünndarmfistel, ausgenommen Duodenum, laparoskopisch	Laparoscopic closure of a small bowel fistula (excluding duodenum)	6919	5-467.2	operationen: Operationen am Verdauungstrakt: Andere Operationen an Dünn- und Dickdarm: Andere Rekonstruktion des Darmes: Verschluss einer Darmfistel, endoskopisch	Procedures: Gastrointestinal procedures: Other procedures on small and large intestine: Other intestinal reconstruction: Endoscopic closure of a fistula.	equal	equal
6	T	oui	6	Z46.79.41	Anlegen eines Reservoirs, Dickdarm	Creating a reservoir, colon	6924	5-467.7	operationen: Operationen am Verdauungstrakt: Andere Operationen an Dünn- und Dickdarm: Andere Rekonstruktion des Darmes: Anlegen eines Reservoirs	Procedures: Gastrointestinal procedures: Other procedures on small and large intestine: Other intestinal reconstruction: Creation of a reservoir	equal	equal
6	T	oui	6	Z46.99.81	Durchtrennung der Laddschen Bänder, offen chirurgisch	Division of the Ladd's bands, open surgery	6962	5-469.6	operationen: Operationen am Verdauungstrakt: Andere Operationen an Dünn- und Dickdarm: Andere Operationen am Darm: Durchtrennung der Laddschen Bänder	Procedures: Procedures on the digestive tract: Other procedures on the small and large intestine: Other intestinal procedures: Division of the Ladd bands	equal	equal
3	T	oui	3	Z47.2	Drainage eines Appendixabszesses	Drainage of an appendiceal abscess	7009	5-479.0	operationen: Operationen am Verdauungstrakt: Operationen an der Appendix: Andere Operationen an der Appendix: Inzision und Drainage eines perityphlitischen Abszesses	Procedures: Procedures on the digestive tract: Appendectomy: Other appendectomy procedures: Incision and drainage of a perityphlitic abscess	equal	equal
6	T	oui	6	Z48.29.10	Chromoendoskopie an Rektum, Rektosigmoid und Perirektalgewebe	Chromoendoscopy of rectum, rectosigmoid, and perirectal tissue	1044	1-655	diagnostische massnahmen: Diagnostische Endoskopie: Diagnostische Endoskopie des unteren Verdauungstraktes: Chromoendoskopie des unteren Verdauungstraktes	Diagnostic measures: Diagnostic endoscopy: Diagnostic endoscopy of the lower gastrointestinal tract: Chromoendoscopy of the lower gastrointestinal tract	equal	equal
6	T	oui	6	Z48.35.11	Lokale Schlingenresektion, submuköse Exzision oder Vollwandexzision (lokal) von rektaler Läsion oder Gewebe, sonstiger Zugang (transanal, endoskopisch-mikrochirurgisch)	Local sling resection, submucosal excision or full-thickness excision of rectal lesion or tissue, other approach	7017	5-482.1	operationen: Operationen am Verdauungstrakt: Operationen am Rektum: Peranale lokale Exzision und Destruktion von erkranktem Gewebe des Rektums: Submukosale Exzision	Procedures: Procedures on the digestive tract: Procedures on the rectum: Perianal local excision and destruction of diseased rectal tissue: Submucosal excision	equal	wider
6	T	oui	6	Z48.66.23	Anteriore Rektumresektion, mit Anastomose, laparoskopisch	Anterior rectal resection with anastomosis, laparoscopic	7048	5-484.0	operationen: Operationen am Verdauungstrakt: Operationen am Rektum: Rektumresektion unter Sphinktererhaltung: Anteriore Manschettenresektion	Procedures: Procedures on the digestive tract: Procedures on the rectum: Rectal resection with sphincter preservation: Anterior stapled transection	equal	equal
6	T	oui	6	Z48.75.11	Abdominale Rektopexie, offen chirurgisch	Open abdominal rectopexy	7608	5-531.4	operationen: Operationen am Verdauungstrakt: Verschluss abdominaler Hernien: Verschluss einer Hernia femoralis: Offen chirurgisch, mit Darmresektion, ohne zusätzliche Laparotomie	Procedures: Gastrointestinal procedures: Abdominal hernia repair: Femoral hernia repair: Open surgical, with bowel resection, without additional laparotomy	equal	equal
6	T	oui	6	Z49.29.20	Endoskopische Laser-Endomikroskopie am Anus und Perianalgewebe	Endoscopic laser endomicroscopy of the anus and perianal tissue	7106	5-490	operationen: Operationen am Verdauungstrakt: Operationen am Anus: Inzision und Exzision von Gewebe der Perianalregion	Procedures: Procedures on the digestive tract: Procedures on the anus: Incision and excision of tissue in the perianal region	equal	equal
4	T	oui	4	Z49.43	Kauterisierung von Hämorrhoiden	Hemorrhoid cauterization	7139	5-493	operationen: Operationen am Verdauungstrakt: Operationen am Anus: Operative Behandlung von Hämorrhoiden	Procedures: Procedures on the digestive tract: Procedures on the anus: Operative treatment of hemorrhoids	equal	equal
6	T	oui	6	Z49.46.10	Exzision von Hämorrhoiden, Stapler-Hämorrhoidopexie	Excision of hemorrhoids, stapled hemorrhoidopexy	7150	5-493.5	operationen: Operationen am Verdauungstrakt: Operationen am Anus: Operative Behandlung von Hämorrhoiden: Mit Stapler	Procedures: Procedures on the digestive tract: Procedures on the anus: Operative treatment of hemorrhoids: With stapler	equal	equal
6	T	oui	6	Z49.78.14	Posteriore sagittale Anorektoplastik [PSARP] mit Korrektur einer Fehlbildung der Vagina, offen chirurgisch und perineal	Posterior sagittal anorectoplasty [PSARP] with correction of a vaginal malformation, open surgery and perineal approach	7169	5-495.3	operationen: Operationen am Verdauungstrakt: Operationen am Anus: Primäre plastische Rekonstruktion bei anorektalen Anomalien: Posteriore sagittale Anorektoplastik [Posteriore sagittale Anorektoplastik] mit Korrektur einer Fehlbildung der Vagina mit ortsständigem Gewebe	Procedures: Procedures on the digestive tract: Procedures on the anus: Primary plastic reconstruction in anorectal anomalies: Posterior sagittal anorectoplasty [Posterior sagittal anorectoplasty] with correction of a vaginal malformation using local tissue	equal	equal
6	T	oui	6	Z50.13.00	Transjuguläre Leberbiopsie, n.n.bez.	Transjugular liver biopsy, as needed	675	1-497.3	diagnostische massnahmen: Biopsie ohne Inzision: Biopsie ohne Inzision an anderen Organen und Geweben: Transvenöse oder transarterielle Biopsie: Leber	Diagnostic measures: Incisional biopsy: Incisional biopsy of other organs and tissues: Transvenous or transarterial biopsy: Liver	equal	equivalent
6	T	oui	6	Z50.23.11	Lokale Leberexzision von 1-2 Herden, je bis zu 4 cm im Durchmesser, offen chirurgisch	Local liver resection of 1-2 nodules, each up to 4 cm in diameter, open surgical	7211	5-501	operationen: Operationen am Verdauungstrakt: Operationen an der Leber: Lokale Exzision und Destruktion von erkranktem Gewebe der Leber (atypische Leberresektion)	Procedures: Gastrointestinal procedures: Liver procedures: Local excision and destruction of diseased liver tissue (atypical liver resection)	equal	equal
6	T	oui	6	Z50.27.15	Lokale Destruktion von Läsion oder Gewebe der Leber, durch irreversible Elektroporation, offen chirurgisch	Local destruction of liver lesion or tissue by irreversible electroporation, open surgery	7217	5-501.7	operationen: Operationen am Verdauungstrakt: Operationen an der Leber: Lokale Exzision und Destruktion von erkranktem Gewebe der Leber (atypische Leberresektion): Destruktion, lokal, durch irreversible Elektroporation	Procedures: Procedures on the digestive tract: Liver procedures: Local excision and destruction of diseased liver tissue (atypical liver resection): Destruction, local, by irreversible electroporation	equal	equal
6	T	oui	6	Z50.2A.11	Leberzystenresektion, offen chirurgisch	Open surgical liver cyst resection	7213	5-501.1	operationen: Operationen am Verdauungstrakt: Operationen an der Leber: Lokale Exzision und Destruktion von erkranktem Gewebe der Leber (atypische Leberresektion): Endozystenresektion (bei Echinokokkuszyste)	Procedures: Procedures on the digestive tract: Liver procedures: Local excision and destruction of diseased liver tissue (atypical liver resection): Endocyst resection (in case of echinococcal cyst)	equal	equal
6	T	oui	6	Z50.2A.2A	Erweiterte Hemihepatektomie rechts, offen chirurgisch	Extended right hepatectomy, open surgical	7227	5-502.2	operationen: Operationen am Verdauungstrakt: Operationen an der Leber: Anatomische (typische) Leberresektion: Hemihepatektomie rechts [Resektion der Segmente 5 bis 8]	Procedures: Procedures on the digestive tract: Procedures on the liver: Anatomical (typical) liver resection: Right hepatectomy [Resection of segments 5 to 8]	equal	equivalent
6	T	oui	6	Z50.2B.11	Transsektion der Leber und Ligatur von Portalvenenästen, ALPPS, Schritt 1, offen chirurgisch	Liver transection and ligation of portal vein branches, ALPPS, Step 1, open surgical	7232	5-502.7	operationen: Operationen am Verdauungstrakt: Operationen an der Leber: Anatomische (typische) Leberresektion: In-situ-Split mit Ligatur der Pfortader bei einer zweizeitigen Leberresektion	Procedures: Procedures on the digestive tract: Procedures on the liver: Anatomical (typical) liver resection: In-situ split with ligation of the portal vein in a two-stage liver resection	equal	equal
4	T	oui	4	Z50.92	Extrakorporelle Leberassistierung	Extracorporeal liver support	17845	8-858	nicht operative therapeutische massnahmen: Maßnahmen für den Blutkreislauf: Extrakorporale Zirkulation und Behandlung von Blut: Extrakorporale Leberersatztherapie [Leberdialyse]	Non-operative therapeutic measures: Measures for the circulatory system: Extracorporeal circulation and blood treatment: Extracorporeal liver support therapy [liver dialysis]	equal	equal
4	T	oui	4	Z51.01	Perkutane Aspiration der Gallenblase	Percutaneous aspiration of the gallbladder	15019	8-154.2	nicht operative therapeutische massnahmen: Therapeutische Katheterisierung, Aspiration, Punktion und Spülung: Therapeutische Aspiration und Entleerung durch Punktion: Therapeutische perkutane Punktion von Organen des Bauchraumes: Gallenblase	Non-operative therapeutic measures: Therapeutic catheterization, aspiration, puncture and lavage: Therapeutic aspiration and drainage by puncture: Therapeutic percutaneous puncture of abdominal organs: Gallbladder	equal	equal
4	T	oui	4	Z51.04	Sonstige Cholezystotomie	Other cholecystectomy	7287	5-510.4x	operationen: Operationen am Verdauungstrakt: Operationen an Gallenblase und Gallenwegen: Cholezystotomie und Cholezystostomie: Cholezystostomie: Sonstige	operations: Operations on the digestive tract: Operations on the gallbladder and bile ducts: Cholecystectomy and cholecystostomy: Cholecystostomy: Other	equal	inexact
6	T	oui	6	Z51.19.20	Endoskopie der Gallenwege durch Inzision der Gallenwege, der Gallenblase oder über den Zystikusstumpf	Endoscopy of the biliary tract through incision of the biliary tract, gallbladder, or via the cystic duct stump	1097	1-695.42	diagnostische massnahmen: Diagnostische Endoskopie: Diagnostische Endoskopie durch Inzision und intraoperativ: Diagnostische Endoskopie des Verdauungstraktes durch Inzision und intraoperativ: Gallenwege: Durch Inzision der Gallenwege, der Gallenblase oder über den Zystikusstumpf	Diagnostic measures: Diagnostic endoscopy: Diagnostic endoscopy through incision and intraoperatively: Diagnostic endoscopy of the digestive tract through incision and intraoperatively: Bile ducts: Through incision of the bile ducts, gallbladder or via the cystic stump	equal	equal
4	T	oui	4	Z51.37	Anastomose zwischen Ductus hepaticus und Gastrointestinaltrakt	Anastomosis between the hepatic duct and gastrointestinal tract	7505	5-527	operationen: Operationen am Verdauungstrakt: Operationen am Pankreas: Anastomose des Ductus pancreaticus	Procedures: Procedures on the digestive tract: Pancreatic procedures: Anastomosis of the pancreatic duct	equal	equal
6	T	oui	6	Z51.41.11	Inzision des Ductus choledochus mit Steinentfernung, offen chirurgisch	Choledochoducts incision with stone removal, open surgery	7433	5-520.2	operationen: Operationen am Verdauungstrakt: Operationen am Pankreas: Inzision des Pankreas: Mit Steinentfernung	Procedures: Procedures on the digestive tract: Procedures on the pancreas: Incision of the pancreas: With stone removal	equal	inexact
6	T	oui	6	Z51.64.11	Endoskopische Exzision oder Destruktion einer Läsion oder Gewebe aus Gallenwegen oder Sphincter Oddii, photodynamische Therapie	Endoscopic excision or destruction of a lesion or tissue from bile ducts or sphincter of Oddi, photodynamic therapy	7331	5-513.41	operationen: Operationen am Verdauungstrakt: Operationen an Gallenblase und Gallenwegen: Endoskopische Operationen an den Gallengängen: Destruktion: Photodynamische Therapie	Procedures: Procedures on the digestive tract: Operations on the gallbladder and bile ducts: Endoscopic procedures on the biliary tract: Destruction: Photodynamic therapy	equal	equal
6	T	oui	6	Z51.98.12	Sonstige perkutane Massnahmen an den Gallenwegen, Perkutan-transhepatische Einlage einer Drainage in den Gallengang	Other percutaneous procedures on the biliary tract, percutaneous transhepatic placement of a drainage tube into the bile duct	7384	5-514.u	operationen: Operationen am Verdauungstrakt: Operationen an Gallenblase und Gallenwegen: Andere Operationen an den Gallengängen: Therapeutische perkutan-transhepatische Endoskopie der Gallenwege	Procedures: Procedures on the digestive tract: Operations on the gallbladder and bile ducts: Other operations on the biliary system: Therapeutic percutaneous transhepatic cholangiography	equal	equal
6	T	oui	6	Z51.9A.22	Perkutan-transhepatische Einlage oder Wechsel von selbstexpandierenden, nicht beschichteten Stents in den Gallengang, 2 Stents	Percutaneous transhepatic placement or exchange of self-expanding, uncoated stents into the biliary tract, 2 stents.	7403	5-517.2	operationen: Operationen am Verdauungstrakt: Operationen an Gallenblase und Gallenwegen: Einlegen oder Wechseln von selbstexpandierenden Stents und Stent-Prothesen in die Gallengänge: Einlegen oder Wechsel von 3 selbstexpandierenden ungecoverten Stents	Procedures: Gastrointestinal surgeries: Biliary tract surgeries: Placement or exchange of self-expanding stents and stent prostheses into the biliary ducts: Placement or exchange of 3 self-expanding uncovered stents.	equal	equal
6	T	oui	6	Z52.01.11	Transgastrale Drainage einer Pankreaszyste, endoskopisch	Transgastric drainage of a pancreatic cyst, endoscopic	7542	5-529.n3	operationen: Operationen am Verdauungstrakt: Operationen am Pankreas: Andere Operationen am Pankreas und am Pankreasgang: Transgastrale Drainage einer Pankreaszyste: Endoskopisch mit Einlegen eines nicht selbstexpandierenden Stents	Procedures: Procedures on the digestive tract: Procedures on the pancreas: Other procedures on the pancreas and pancreatic duct: Transgastric drainage of a pancreatic cyst: Endoscopic with placement of a non-self-expanding stent	equal	equal
6	T	oui	6	Z52.09.22	Transduodenale Punktion einer Pankreas(pseudo)zyste, endosonographisch	Transduodenal puncture of a pancreatic cyst, endoscopic	7500	5-526.k	operationen: Operationen am Verdauungstrakt: Operationen am Pankreas: Endoskopische Operationen am Pankreasgang: Transgastrale oder transduodenale Punktion des Pankreasganges	Procedures: Procedures on the digestive tract: Procedures on the pancreas: Endoscopic procedures on the pancreatic duct: Transgastric or transduodenal puncture of the pancreatic duct	equal	wider
6	T	oui	6	Z52.83.10	Heterotransplantat des Pankreas, Retransplantation eines Pankreassegmentes während desselben stationären Aufenthaltes	Heterotransplant of the pancreas, retransplantation of a pancreatic segment during the same hospital stay	7517	5-528.4	operationen: Operationen am Verdauungstrakt: Operationen am Pankreas: Transplantation von Pankreas(gewebe): Retransplantation eines Pankreassegmentes während desselben stationären Aufenthaltes	Procedures: Procedures on the digestive tract: Pancreas procedures: Pancreas (tissue) transplantation: Re-transplantation of a pancreatic segment during the same hospital stay	equal	equal
6	T	oui	6	Z52.93.10	Endoskopische Einlage und Wechsel eines nicht selbstexpandierenden Stents [Prothese] in den Ductus pancreaticus	Endoscopic placement and exchange of a non-self-expanding stent [prosthesis] in the pancreatic duct	7493	5-526.e1	operationen: Operationen am Verdauungstrakt: Operationen am Pankreas: Endoskopische Operationen am Pankreasgang: Einlegen einer Prothese: Nicht selbstexpandierend	Procedures: Procedures on the digestive tract: Procedures on the pancreas: Endoscopic procedures on the pancreatic duct: Placement of a prosthesis: Non-self-expanding	equal	equal
6	T	oui	6	Z54.0X.10	Inzision an der Bauchwand, Extraperitoneale Drainage der Bauchwand	Incision in the abdominal wall, extraperitoneal drainage of the abdominal wall	7726	5-540.1	operationen: Operationen am Verdauungstrakt: Andere Operationen in der Bauchregion: Inzision der Bauchwand: Extraperitoneale Drainage	Procedures: Procedures on the digestive tract: Other procedures in the abdominal region: Incision of the abdominal wall: Extraperitoneal drainage	equal	equal
6	T	oui	6	Z54.21.10	Laparoskopie, Diagnostische Laparoskopie	Laparoscopy, Diagnostic laparoscopy	937	1-61...1-69	diagnostische massnahmen: Diagnostische Endoskopie	Diagnostic procedures: Diagnostic endoscopy	equal	equal
4	T	oui	4	Z54.25	Peritoneallavage	Peritoneal lavage	14985	8-148.0	nicht operative therapeutische massnahmen: Therapeutische Katheterisierung, Aspiration, Punktion und Spülung: Andere Formen von therapeutischer Katheterisierung und Kanüleneinlage: Therapeutische Drainage von anderen Organen und Geweben: Peritonealraum	Non-operative therapeutic measures: Therapeutic catheterization, aspiration, puncture and lavage: Other forms of therapeutic catheterization and cannulation: Therapeutic drainage of other organs and tissues: Peritoneal cavity	equal	equal
6	T	oui	6	Z54.4X.10	Exzision von Appendices epiploicae	Excision of epiploic appendices	7747	5-543.0	operationen: Operationen am Verdauungstrakt: Andere Operationen in der Bauchregion: Exzision und Destruktion von peritonealem Gewebe: Exzision einer Appendix epiploica	Procedures: Procedures on the digestive tract: Other procedures in the abdominal region: Excision and destruction of peritoneal tissue: Excision of an appendix epiploica	equal	equivalent
4	T	oui	4	Z54.62	Verzögerter Verschluss einer granulierenden Abdominalwunde	Delayed closure of a granulating abdominal wound	7760	5-545.0	operationen: Operationen am Verdauungstrakt: Andere Operationen in der Bauchregion: Verschluss von Bauchwand und Peritoneum: Sekundärer Verschluss der Bauchwand (bei postoperativer Wunddehiszenz)	Procedures: Procedures on the digestive tract: Other procedures in the abdominal region: Closure of the abdominal wall and peritoneum: Secondary closure of the abdominal wall (in case of postoperative wound dehiscence)	equal	equal
6	T	oui	6	Z54.71.10	Versorgung einer Gastroschisis, mit Transplantat oder Prothese	Management of a gastroschisis, with graft or prosthesis	7682	5-537.3	operationen: Operationen am Verdauungstrakt: Verschluss abdominaler Hernien: Verschluss kongenitaler Bauchwanddefekte (Omphalozele, Laparoschisis): Mit allogenem oder xenogenem Material	Procedures: Gastrointestinal procedures: Closure of abdominal hernias: Closure of congenital abdominal wall defects (omphalocele, laparoschisis): With allogeneic or xenogeneic material	equal	equal
4	T	oui	4	Z54.72	Sonstige Rekonstruktion an der Bauchwand	Other reconstruction of the abdominal wall	7764	5-546	operationen: Operationen am Verdauungstrakt: Andere Operationen in der Bauchregion: Plastische Rekonstruktion von Bauchwand und Peritoneum	Procedures: Procedures on the digestive tract: Other procedures in the abdominal region: Plastic reconstruction of the abdominal wall and peritoneum	equal	equal
6	T	oui	6	Z54.99.31	Debulking über Laparotomie	Debulking via laparotomy	14896	8-122	nicht operative therapeutische massnahmen: Manipulationen an Verdauungstrakt und Harntrakt: Manipulationen am Verdauungstrakt: Desinvagination	Non-operative therapeutic measures: Manipulations of the digestive and urinary tracts: Manipulations of the digestive tract: Desinvagination	equal	equal
6	T	oui	6	Z54.99.50	Anlegen eines temporären Bauchwandverschlusses	Placement of a temporary abdominal wall closure	7761	5-545.1	operationen: Operationen am Verdauungstrakt: Andere Operationen in der Bauchregion: Verschluss von Bauchwand und Peritoneum: Definitiver Verschluss eines temporären Bauchdeckenverschlusses	Procedures: Procedures on the digestive tract: Other procedures in the abdominal region: Closure of the abdominal wall and peritoneum: Definitive closure of a temporary abdominal wall closure	equal	equal
6	T	oui	6	Z54.99.83	Wechsel einer automatischen, programmierbaren und wiederaufladbaren Pumpe zur kontinuierlichen Aszitesdrainage	Exchange of an automatic, programmable, and rechargeable pump for continuous ascites drainage	7811	5-549.d1	operationen: Operationen am Verdauungstrakt: Andere Operationen in der Bauchregion: Andere Bauchoperationen: Wechsel eines Katheterverweilsystems im Bauchraum, subkutan getunnelt: Zur Aszitesdrainage	Procedures: Gastrointestinal surgeries: Other abdominal surgeries: Other abdominal surgeries: Catheter system exchange in the peritoneal cavity, subcutaneously tunneled: For ascites drainage	equal	equal
6	T	oui	6	Z55.01.13	Nephrotomie, offen chirurgisch zur Punktion einer Zyste	Open surgical nephrostomy for cyst aspiration	7840	5-551.6	operationen: Operationen an den Harnorganen: Operationen an der Niere: Offen chirurgische Nephrotomie, Nephrostomie, Pyelotomie und Pyelostomie: Punktion einer Zyste	operations: Operations on the urinary organs: Operations on the kidney: Open surgical nephrectomy, nephrostomy, pyelotomy and pyelostomy: Puncture of a cyst	equal	narrower
6	T	oui	6	Z55.04.10	Perkutane Nephrostomie mit Desintegration von Steinmaterial, Entfernung von Harnstein(en)aus dem Nierenbecken	Percutaneous nephrostomy with stone disintegration and removal of renal calculi from the renal pelvis	7824	5-550.3	operationen: Operationen an den Harnorganen: Operationen an der Niere: Perkutan-transrenale Nephrotomie, Nephrostomie, Steinentfernung, Pyeloplastik und ureterorenoskopische Steinentfernung: Entfernung eines Steines mit Desintegration (Lithotripsie)	Surgeries on the urinary organs: Surgeries on the kidney: Percutaneous transrenal nephrostomy, nephrostomy, stone removal, pyeloplasty and ureterorenoscopic stone removal: Removal of a stone with disintegration (lithotripsy).	equal	equal
6	T	oui	6	Z55.3A.13	Lokale Exzision und Destruktion von Läsion oder Gewebe an der Niere, ureterorenoskopisch	Local excision and destruction of lesion or tissue in the kidney, ureterorenoscopically	7862	5-552.6	operationen: Operationen an den Harnorganen: Operationen an der Niere: Exzision und Destruktion von (erkranktem) Gewebe der Niere: Destruktion, ureterorenoskopisch	operations: Operations on the urinary organs: Operations on the kidney: Excision and destruction of (diseased) kidney tissue: Destruction, ureterorenoscopically	equal	equal
6	T	oui	6	Z55.69.30	Sonstige Nierentransplantation, En-bloc-Transplantat	Other kidney transplantation, en bloc graft	7938	5-555.5	operationen: Operationen an den Harnorganen: Operationen an der Niere: Nierentransplantation: En-bloc-Transplantat	operations: Operations on the urinary organs: Kidney operations: Kidney transplantation: en bloc transplant	equal	equal
4	T	oui	4	Z55.85	Symphysiotomie einer Hufeisenniere	Symphysiotomy of a horseshoe kidney	7963	5-557.3	operationen: Operationen an den Harnorganen: Operationen an der Niere: Rekonstruktion der Niere: Trennung einer Hufeisenniere	operations: Operations on the urinary organs: Kidney operations: Kidney reconstruction: Separation of a horseshoe kidney	equal	equal
6	T	oui	6	Z56.0X.10	Transurethrales Entfernen einer Obstruktion von Ureter und Nierenbecken, Entfernung eines Harnsteins	Transurethral removal of ureteral and renal pelvic obstruction, stone removal	8039	5-560.8	operationen: Operationen an den Harnorganen: Operationen am Ureter: Transurethrale und perkutan-transrenale Erweiterung des Ureters: Entfernung eines Stents, transurethral	Surgeries: Urinary tract surgeries: Ureteral surgeries: Transurethral and percutaneous-transrenal ureteral dilation: Removal of a stent, transurethrally.	equal	equal
6	T	oui	6	Z56.1X.11	Ureterale Meatotomie, transurethral	Ureteral meatotomy, transurethral	8026	5-560	operationen: Operationen an den Harnorganen: Operationen am Ureter: Transurethrale und perkutan-transrenale Erweiterung des Ureters	Procedures: Urinary tract surgeries: Ureteral surgeries: Transurethral and percutaneous transrenal ureteral dilation	equal	equal
4	T	oui	4	Z56.35	Endoskopie (Zystoskopie) am Ileum-Conduit	Endoscopy of the ileal conduit	1059	1-666.2	diagnostische massnahmen: Diagnostische Endoskopie: Diagnostische Endoskopie der Harnwege: Diagnostische Endoskopie einer Harnableitung: Conduit	Diagnostic measures: Diagnostic endoscopy: Diagnostic endoscopy of the urinary tract: Diagnostic endoscopy of a ureteral stent: Conduit	equal	wider
6	T	oui	6	Z56.71.11	Ureterosigmoideostomie mit Reservoirbildung, laparoskopisch	Ureter sigmoidostomy with reservoir formation, laparoscopic	8150	5-567.4	operationen: Operationen an den Harnorganen: Operationen am Ureter: Interne Harnableitung über den Darm: Ureterosigmoideostomie mit Reservoirbildung aus Dünndarm, laparoskopisch	Procedures: Operations on the urinary organs: Operations on the ureter: Internal urinary diversion through the bowel: Ureterosigmoidostomy with reservoir formation from small intestine, laparoscopic	equal	equal
6	T	oui	6	Z56.74.11	Ureterozystoneostomie, isolierte Antirefluxplastik (z. B. nach Lich-Gregoir), laparoskopisch	Ureterocystostomy, isolated antireflux surgery, laparoscopic	8161	5-568.9	operationen: Operationen an den Harnorganen: Operationen am Ureter: Rekonstruktion des Ureters: Isolierte Antirefluxplastik (z.B. nach Lich-Gregoir)	operations: Operations on the urinary organs: Ureteral operations: Ureter reconstruction: Isolated antireflux surgery (e.g., Lich-Gregoir)	equal	inexact
6	T	oui	6	Z57.0X.11	Transurethrale Drainage der Harnblase, Entfernung eines Fremdkörpers	Transurethral bladder drainage, removal of a foreign body	8280	5-579.1	operationen: Operationen an den Harnorganen: Operationen an der Harnblase: Andere Operationen an der Harnblase: Entfernung eines Fremdkörpers aus einer Ersatzharnblase	operations: Operations on the urinary organs: Operations on the bladder: Other operations on the bladder: Removal of a foreign body from an artificial bladder	equal	equal
6	T	oui	6	Z57.19.23	Sonstige Zystotomie, Zystotomie (Sectio alta), mit Ausräumung einer Blasentamponade	Other cystotomy, cystotomy, with evacuation of bladder tamponade	8197	5-571.3	operationen: Operationen an den Harnorganen: Operationen an der Harnblase: Zystotomie [Sectio alta]: Operative Ausräumung einer Harnblasentamponade	Surgeries: Urinary tract surgeries: Bladder surgeries: Cystostomy [High section]: Operative evacuation of a bladder tamponade	equal	equal
6	T	oui	6	Z57.59.20	Offene Exzision oder Destruktion von anderer Läsion oder Gewebe an der Harnblase, Myektomie	Open excision or destruction of other lesions or tissue in the bladder, myectomy	8227	5-574	operationen: Operationen an den Harnorganen: Operationen an der Harnblase: Offen chirurgische und laparoskopische Exzision und Destruktion von (erkranktem) Gewebe der Harnblase	operations on the urinary organs: operations on the bladder: open and laparoscopic excision and destruction of (diseased) bladder tissue	equal	equal
6	T	oui	6	Z57.71.20	Radikale Zystektomie, mit Urethrektomie, beim Mann, offen chirurgisch	Radical cystectomy with urethrectomy in male, open surgical approach	8314	5-583.2	operationen: Operationen an den Harnorganen: Operationen an der Urethra: Urethrektomie als selbständiger Eingriff: Radikal, beim Mann	Surgeries: Urinary tract surgeries: Urethra surgeries: Urethrectomy as an independent procedure: Radical, in men	equal	equal
4	T	oui	4	Z57.83	Verschluss einer vesikointestinalen Fistel	Closure of a vesicointestinal fistula	8270	5-578.3	operationen: Operationen an den Harnorganen: Operationen an der Harnblase: Andere plastische Rekonstruktion der Harnblase: Verschluss einer Harnblasen-Darm-Fistel	operations: Operations on the urinary organs: Operations on the bladder: Other plastic reconstruction of the bladder: Closure of a vesicointestinal fistula	equal	equal
6	T	oui	6	Z57.87.21	Umwandlung einer anderen supravesikalen Harnableitung in eine Ersatzharnblase, laparoskopisch	Conversion of another suprapubic urinary diversion to a continent urinary reservoir, laparoscopically	8100	5-566.11	operationen: Operationen an den Harnorganen: Operationen am Ureter: Kutane Harnableitung mit Darmreservoir (kontinentes Stoma): Anlegen eines Ileozäkalreservoirs: Laparoskopisch	Surgeries: Urinary tract surgeries: Ureteral surgeries: Cutaneous urinary diversion with bowel reservoir (continent stoma): Creation of an ileocecal reservoir: Laparoscopic	equal	equivalent
6	T	oui	6	Z57.87.31	Reduktionsplastik der Harnblase, laparoskopisch	Bladder reduction surgery, laparoscopic	8227	5-574	operationen: Operationen an den Harnorganen: Operationen an der Harnblase: Offen chirurgische und laparoskopische Exzision und Destruktion von (erkranktem) Gewebe der Harnblase	operations on the urinary organs: operations on the bladder: open and laparoscopic excision and destruction of (diseased) bladder tissue	equal	equal
4	T	oui	4	Z57.94	Einsetzen eines transurethralen Dauerkatheters	Insertion of a transurethral indwelling catheter	14938	8-137.00	nicht operative therapeutische massnahmen: Manipulationen an Verdauungstrakt und Harntrakt: Manipulationen am Harntrakt: Einlegen, Wechsel und Entfernung einer Ureterschiene [Ureterkatheter]: Einlegen: Transurethral	Non-operative therapeutic measures: Manipulations of the digestive tract and urinary tract: Manipulations of the urinary tract: Insertion, exchange and removal of a ureteral stent [urinary catheter]: Insertion: Transurethral	equal	equal
6	T	oui	6	Z57.99.11	Entfernung eines Steines aus einer Ersatzharnblase, transurethral, perkutan, über ein Stoma oder sonstige	Removal of a stone from a replacement bladder, transurethrally, percutaneously, through a stoma or otherwise	8279	5-579.0	operationen: Operationen an den Harnorganen: Operationen an der Harnblase: Andere Operationen an der Harnblase: Entfernung eines Steines aus einer Ersatzharnblase	operations: Operations on the urinary organs: Operations on the bladder: Other operations on the bladder: Removal of a stone from an artificial bladder	equal	equal
6	T	oui	6	Z57.99.23	Injektionsbehandlung an der Harnblase, laparoskopisch	Injection treatment of the bladder, laparoscopically	8285	5-579.6	operationen: Operationen an den Harnorganen: Operationen an der Harnblase: Andere Operationen an der Harnblase: Injektionsbehandlung	operations: Operations on the urinary organs: Bladder operations: Other bladder operations: Injection therapy	equal	equal
6	T	oui	6	Z57.99.30	Revision an der Harnblase, perkutan	Revision of the bladder, percutaneously	8289	5-57a	operationen: Operationen an den Harnorganen: Operationen an der Harnblase: Perkutane Destruktion von (erkranktem) Gewebe der Harnblase	Procedures: Procedures on the urinary organs: Bladder procedures: Percutaneous destruction of (diseased) bladder tissue	equal	equal
4	T	oui	4	Z58.24	Biopsie am Periurethralgewebe	Biopsy of periurethral tissue	852	1-561.1	diagnostische massnahmen: Biopsie durch Inzision: Biopsie an Harnwegen und männlichen Genitalorganen durch Inzision: Biopsie an Urethra und periurethralem Gewebe durch Inzision: Periurethrales Gewebe	Diagnostic measures: Incisional biopsy: Biopsy of urinary tract and male genitalia through incision: Biopsy of urethra and periurethral tissue through incision: Periurethral tissue	equal	equal
6	T	oui	6	Z58.39.30	Urethrektomie als selbstständiger Eingriff bei der Frau, einfach	Urethrectomy as an independent procedure in women, simple	8313	5-583.1	operationen: Operationen an den Harnorganen: Operationen an der Urethra: Urethrektomie als selbständiger Eingriff: Einfach, bei der Frau	Surgeries: Surgical procedures on the urinary organs: Surgical procedures on the urethra: Urethrectomy as an independent procedure: Simple, in women	equal	equal
6	T	oui	6	Z58.49.21	Zweizeitige plastische Rekonstruktion der Urethra, erste Sitzung, mit Mund- oder Harnblasenschleimhaut	Two-stage plastic reconstruction of the urethra, first session, with oral or bladder mucosa	8338	5-584.84	operationen: Operationen an den Harnorganen: Operationen an der Urethra: Rekonstruktion der Urethra: Plastische Rekonstruktion, zweizeitig, erste Sitzung: Transplantation von in vitro hergestelltem Gewebe aus autogener Mundschleimhaut	operations: Operations on the urinary organs: Operations on the urethra: Urethra reconstruction: Two-stage plastic reconstruction, first session: Transplantation of in vitro grown tissue from autologous oral mucosa	equal	equal
6	T	oui	6	Z58.93.11	Implantation eines künstlichen Harnblasensphinkters	Implantation of an artificial urinary sphincter	8438	5-597.0	operationen: Operationen an den Harnorganen: Andere Operationen an den Harnorganen: Eingriffe bei artifiziellem Harnblasensphinkter: Implantation	operations: Operations on the urinary organs: Other operations on the urinary organs: Procedures with artificial urinary sphincter: Implantation	equal	wider
4	T	oui	4	Z59.71	Levatorplastik zur urethrovesikalen Suspension	Levatorplasty for urethrovesical suspension	8378	5-593.00	operationen: Operationen an den Harnorganen: Andere Operationen an den Harnorganen: Transvaginale Suspensionsoperation [Zügeloperation]: Mit autogenem Material: Levatorplastik	Surgeries: Surgeries on the urinary organs: Other surgeries on the urinary organs: Transvaginal suspension surgery [sling operation]: With autologous material: Levatorplasty	equal	equal
6	T	oui	6	Z59.73.12	Transvaginale Suspension mit alloplastischer Bandeinlage, transobturatorisches Band [TOT]	Transvaginal suspension with alloplastic band sling, transobturator tape (TOT)	8387	5-593.20	operationen: Operationen an den Harnorganen: Andere Operationen an den Harnorganen: Transvaginale Suspensionsoperation [Zügeloperation]: Mit alloplastischem Material: Spannungsfreies vaginales Band (TVT) oder transobturatorisches Band (TOT, Tension free vaginal tape obturator (TVT-Obturator))	operations: Operations on the urinary organs: Other operations on the urinary organs: Transvaginal suspension operation [sling operation]: With alloplastic material: Tension-free vaginal tape (TVT) or transobturator tape (TOT, Tension free vaginal tape obturator (TVT-Obturator))	equal	equal
6	T	oui	6	Z59.8X.10	Ureter-Katheterisierung, Einlage, transurethral	Ureter catheterization, insertion, transurethral	8026	5-560	operationen: Operationen an den Harnorganen: Operationen am Ureter: Transurethrale und perkutan-transrenale Erweiterung des Ureters	Procedures: Urinary tract surgeries: Ureteral surgeries: Transurethral and percutaneous transrenal ureteral dilation	equal	equal
6	T	oui	6	Z60.21.11	Transurethrale laserinduzierte Prostatektomie mit Kontakt beim Laser	Transurethral laser-induced prostatectomy with contact laser	8513	5-602.5	operationen: Operationen an den männlichen Genitalorganen: Operationen an Prostata und Vesiculae seminales: Transrektale und perkutane Destruktion von Prostatagewebe: Durch transperineale, nicht thermische, lasergesteuerte photodynamische Therapie	operations: Operations on the male genitalia: Operations on prostate and seminal vesicles: Transrectal and percutaneous destruction of prostatic tissue: Through transperineal, non-thermal, laser-guided photodynamic therapy	equal	equal
3	T	oui	3	Z60.3	Suprapubische Prostatektomie	Suprapubic prostatectomy	8518	5-603.0	operationen: Operationen an den männlichen Genitalorganen: Operationen an Prostata und Vesiculae seminales: Exzision und Destruktion von Prostatagewebe: Suprapubisch-transvesikal	Surgeries on the male genitalia: Surgeries on prostate and seminal vesicles: Excision and destruction of prostatic tissue: Suprapubic transvesical	equal	equal
4	T	oui	4	Z60.95	Transurethrale Ballon-Dilatation einer prostatischen Urethra	Transurethral balloon dilation of a prostatic urethra	14965	8-139.11	nicht operative therapeutische massnahmen: Manipulationen an Verdauungstrakt und Harntrakt: Manipulationen am Harntrakt: Andere Manipulationen am Harntrakt: Ballondilatation der Urethra: Mit Medikamentenbeschichtung des Ballonkatheters	Non-operative therapeutic measures: Manipulations of the digestive tract and urinary tract: Manipulations of the urinary tract: Other manipulations of the urinary tract: Balloon dilation of the urethra: With medication coating of the balloon catheter	equal	equal
6	T	oui	6	Z60.99.33	Entfernen eines Stent aus der prostatischen Harnröhre	Removal of a stent from the prostatic urethra	8569	5-609.6	operationen: Operationen an den männlichen Genitalorganen: Operationen an Prostata und Vesiculae seminales: Andere Operationen an der Prostata: Entfernung eines Stents aus der prostatischen Harnröhre	Surgeries on the male genitalia: Surgeries on the prostate and seminal vesicles: Other prostate surgeries: Removal of a stent from the prostatic urethra	equal	equal
6	T	oui	6	Z61.0X.10	Inzision und Drainage an Skrotum und Tunica vaginalis testis, zur Fremdkörperentfernung	Incision and drainage of scrotum and tunica vaginalis testis for foreign body removal	8593	5-610.2	operationen: Operationen an den männlichen Genitalorganen: Operationen an Skrotum und Tunica vaginalis testis: Inzision an Skrotum und Tunica vaginalis testis: Entfernung eines Fremdkörpers	Surgeries on the male genitalia: Surgeries on the scrotum and tunica vaginalis testis: Incision on the scrotum and tunica vaginalis testis: Removal of a foreign body	equal	equal
6	T	oui	6	Z61.3X.11	Exzision oder Destruktion von Läsion oder Gewebe am Skrotum, totale Resektion	Excision or destruction of lesion or tissue on the scrotum, total resection	8600	5-612.2	operationen: Operationen an den männlichen Genitalorganen: Operationen an Skrotum und Tunica vaginalis testis: Exzision und Destruktion von erkranktem Skrotumgewebe: Totale Resektion	Surgeries on the male genitalia: Surgeries on the scrotum and tunica vaginalis testis: Excision and destruction of diseased scrotal tissue: Total resection	equal	equal
6	T	oui	6	Z62.3X.11	Einseitige Orchidektomie, skrotal, mit Epididymektomie	Unilateral orchiectomy, scrotal, with epididymectomy	8616	5-622.1	operationen: Operationen an den männlichen Genitalorganen: Operationen am Hoden: Orchidektomie: Skrotal, mit Epididymektomie	operations: Operations on the male genitalia: Operations on the testicle: Orchiectomy: Scrotal, with epididymectomy	equal	equal
6	T	oui	6	Z62.99.11	Exploration bei Kryptorchismus, abdominal, offen chirurgisch	Exploration for cryptorchidism, abdominal, open surgical	8633	5-625.5	operationen: Operationen an den männlichen Genitalorganen: Operationen am Hoden: Exploration bei Kryptorchismus: Abdominal, offen chirurgisch	operations: Operations on the male genitalia: Testicular operations: Exploration for cryptorchidism: Abdominal, open surgical	equal	equal
3	T	oui	3	Z63.2	Exzision einer Epididymis-Zyste	Excision of an epididymal cyst	8669	5-631.0	operationen: Operationen an den männlichen Genitalorganen: Operationen an Funiculus spermaticus, Epididymis und Ductus deferens: Exzision im Bereich der Epididymis: Zyste	Surgeries on the male genitalia: Surgeries on the spermatic cord, epididymis, and vas deferens: Excision in the area of the epididymis: cyst	equal	equal
4	T	oui	4	Z64.51	Operation zur Geschlechtsumwandlung von weiblich zu männlich	Gender affirming surgery from female to male	8760	5-646.1	operationen: Operationen an den männlichen Genitalorganen: Operationen am Penis: Operationen zur Genitalorganumwandlung: Genitalorgantransformation von männlich zu weiblich	operations: Operations on the male genitalia: Penis operations: Gender-affirming genital surgeries: Male-to-female genital transformation	equal	equal
4	T	oui	4	Z65.23	Laparoskopische Marsupialisation einer ovariellen Zyste	Laparoscopic marsupialization of an ovarian cyst	7448	5-522	operationen: Operationen am Verdauungstrakt: Operationen am Pankreas: Marsupialisation einer Pankreaszyste	Procedures: Procedures on the digestive tract: Procedures on the pancreas: Marsupialization of a pancreatic cyst	equal	equal
6	T	oui	6	Z66.41.41	Totale Salpingektomie, vaginal-laparoskopisch assistiert	Total salpingectomy, vaginally laparoscopically assisted	8893	5-660.3	operationen: Operationen an den weiblichen Genitalorganen: Operationen an der Tuba uterina: Salpingotomie: Vaginal, laparoskopisch assistiert	operations: Operations on the female genital organs: Operations on the fallopian tube: Salpingectomy: Vaginal, laparoscopically assisted	equal	equal
3	T	oui	3	Z66.8	Insufflation einer Tuba uterina	Instillation of a uterine tube	9501	5-755.8	operationen: Geburtshilfliche Operationen: Andere geburtshilfliche Operationen: Andere intrauterine Operationen am Fetus: Implantation eines Herzschrittmachers	operations: Obstetric Operations: Other obstetric operations: Other intrauterine fetal operations: Implantation of a pacemaker	equal	inexact
4	T	oui	4	Z66.A4	Destruktion und Verschluss der Tubae uterinae, vaginal-laparoskopisch assistiert	Destruction and occlusion of the fallopian tubes, vaginally assisted laparoscopic	8905	5-663	operationen: Operationen an den weiblichen Genitalorganen: Operationen an der Tuba uterina: Destruktion und Verschluss der Tubae uterinae [Sterilisationsoperation]	Surgeries on female genital organs: Surgeries on the fallopian tubes: Destruction and occlusion of the fallopian tubes [Sterilization surgery]	equal	equal
6	T	oui	6	Z67.4X.11	Radikale Zervixstumpfextirpation, ohne Lymphadenektomie, offen chirurgisch (abdominal)	Radical trachelectomy, without lymphadenectomy, open surgical	4793	5-324.a1	operationen: Operationen an Lunge und Bronchus: Exzision und Resektion an Lunge und Bronchus: Einfache Lobektomie und Bilobektomie der Lunge: Lobektomie ohne radikale Lymphadenektomie, offen chirurgisch: Ohne bronchoplastische oder angioplastische Erweiterung	Surgeries on lung and bronchus: Excision and resection of lung and bronchus: Simple lobectomy and bilobectomy of the lung: Lobectomy without radical lymphadenectomy, open surgery: Without bronchoplastic or angioplasty.	equal	inexact
6	T	oui	6	Z68.12.11	Diagnostische Hysteroskopie	Diagnostic hysteroscopy	1071	1-672	diagnostische massnahmen: Diagnostische Endoskopie: Diagnostische Endoskopie der weiblichen Genitalorgane: Diagnostische Hysteroskopie	Diagnostic measures: Diagnostic endoscopy: Diagnostic endoscopy of the female genital organs: Diagnostic hysteroscopy	equal	equal
4	T	oui	4	Z68.14	Offene Biopsie an den uterinen Ligamenten	Open biopsy of the uterine ligaments	522	1-474.3	diagnostische massnahmen: Biopsie ohne Inzision: Biopsie ohne Inzision an weiblichen Genitalorganen: (Perkutane) Biopsie an weiblichen Genitalorganen mit Steuerung durch bildgebende Verfahren: Ligamente des Uterus	Diagnostic measures: Biopsy without incision: Biopsy without incision on female genital organs: (Percutaneous) biopsy of female genital organs with image guidance: Uterine ligaments	equal	equal
6	T	oui	6	Z68.29.48	Exzision und Destruktion eines oder mehrerer Myome am Uterus, laparoskopisch	Excision and destruction of one or more uterine myomas, laparoscopically	9018	5-681.83	operationen: Operationen an den weiblichen Genitalorganen: Inzision, Exzision und Exstirpation des Uterus: Exzision und Destruktion von erkranktem Gewebe des Uterus: Entfernung eines oder mehrerer Myome ohne ausgedehnte Naht des Myometriums: Hysteroskopisch	Operations on the female genital organs: Incision, excision and extirpation of the uterus: Excision and destruction of diseased uterine tissue: Removal of one or more fibroids without extensive suturing of the myometrium: Hysteroscopic	equal	equal
4	T	oui	4	Z68.31	Subtotale Hysterektomie, laparoskopisch	Subtotal hysterectomy, laparoscopic	9043	5-682.y	operationen: Operationen an den weiblichen Genitalorganen: Inzision, Exzision und Exstirpation des Uterus: Subtotale Uterusexstirpation: Nicht näher bezeichnet	Surgeries on female genital organs: Incision, excision and extirpation of the uterus: subtotal hysterectomy: not further specified	equal	equal
3	T	oui	3	Z68.8	Becken-Eviszeration	Pelvic Exenteration	8255	5-576.8	operationen: Operationen an den Harnorganen: Operationen an der Harnblase: Zystektomie: Eviszeration des kleinen Beckens beim Mann	operations: Operations on the urinary organs: Operations on the bladder: Cystostomy: Exenteration of the pelvis in men	equal	equal
6	T	oui	6	Z69.92.12	Direkte intraperitoneale Insemination [DIPI]	Direct intraperitoneal insemination	18394	9-270.1	ergänzende massnahmen: Geburtsbegleitende Maßnahmen und Behandlung wegen Infertilität: Behandlung wegen Infertilität: Künstliche Insemination: Direkte intraperitoneale Insemination (DIPI)	Supplementary measures: Accompanying measures during childbirth and treatment for infertility: Treatment for infertility: Artificial insemination: Direct intraperitoneal insemination (DIPI)	equal	equal
6	T	oui	6	Z69.92.24	Laparoskopische Ovumaspiration mit intratubärem Gametentransfer [GIFT]	Laparoscopic oocyte aspiration with intrafallopian gamete transfer	18399	9-271.1	ergänzende massnahmen: Geburtsbegleitende Maßnahmen und Behandlung wegen Infertilität: Behandlung wegen Infertilität: Follikelpunktion und Ovumaspiration, intratubarer Gametentransfer (GIFT): Laparoskopische Ovumaspiration	Supplementary measures: Accompanying measures during childbirth and treatment for infertility: Treatment for infertility: Follicle aspiration and oocyte retrieval, intrafallopian gamete transfer (GIFT): Laparoscopic oocyte retrieval	equal	equal
4	T	oui	4	Z69.94	Manuelle Reposition einer Inversio uteri	Manual repositioning of a uterine inversion	9528	5-759.2	operationen: Geburtshilfliche Operationen: Andere geburtshilfliche Operationen: Andere geburtshilfliche Operationen: Operative Korrektur einer Inversio uteri	Operations: Obstetric Operations: Other Obstetric Operations: Other Obstetric Operations: Operative correction of uterine inversion	equal	equal
4	T	oui	4	Z70.23	Biopsie am Douglasraum	Biopsy of the cul-de-sac	678	1-50...1-58	diagnostische massnahmen: Biopsie durch Inzision	Diagnostic measures: Biopsy via incision	equal	equal
4	T	oui	4	Z70.40	Obliteration und subtotale oder totale Exstirpation der Vagina, n.n.bez.	Obliteration and subtotal or total excision of the vagina, unspecified.	9033	5-681.y	operationen: Operationen an den weiblichen Genitalorganen: Inzision, Exzision und Exstirpation des Uterus: Exzision und Destruktion von erkranktem Gewebe des Uterus: Nicht näher bezeichnet	Surgeries on female genital organs: Incision, excision and extirpation of the uterus: Excision and destruction of diseased uterine tissue: Not further specified	equal	equal
4	T	oui	4	Z70.63	Konstruktion einer Vagina mit Transplantat oder Prothese	Construction of a vagina with a graft or prosthesis	9350	5-716.1	operationen: Operationen an den weiblichen Genitalorganen: Operationen an der Vulva: Konstruktion und Rekonstruktion der Vulva (und des Perineums): Plastische Rekonstruktion	Surgeries on female genital organs: Surgeries on the vulva: Construction and reconstruction of the vulva (and perineum): Plastic reconstruction	equal	equal
6	T	oui	6	Z71.11.11	Perkutane [geschlossene] [Nadel-] Biopsie an der Vulva mit Steuerung durch bildgebende Verfahren	Percutaneous [closed] [needle] biopsy of the vulva with image guidance	524	1-474.5	diagnostische massnahmen: Biopsie ohne Inzision: Biopsie ohne Inzision an weiblichen Genitalorganen: (Perkutane) Biopsie an weiblichen Genitalorganen mit Steuerung durch bildgebende Verfahren: Vulva	Diagnostic measures: Biopsy without incision: Biopsy without incision on female genital organs: (Percutaneous) biopsy of female genital organs with image guidance: Vulva	equal	equal
4	T	oui	4	Z71.21	Perkutane Aspiration an einer Bartholin-Drüse (Zyste)	Percutaneous aspiration of a Bartholin's gland	1186	1-846	diagnostische massnahmen: Explorative diagnostische Maßnahmen: Diagnostische Punktion und Aspiration: Diagnostische perkutane Punktion von Harnorganen	Diagnostic measures: Exploratory diagnostic measures: Diagnostic aspiration and puncture: Percutaneous diagnostic puncture of urinary organs	equal	wider
4	T	oui	4	Z71.79	Plastische Rekonstruktion an Vulva und Perineum, sonstige	Plastic reconstruction of vulva and perineum, other	9350	5-716.1	operationen: Operationen an den weiblichen Genitalorganen: Operationen an der Vulva: Konstruktion und Rekonstruktion der Vulva (und des Perineums): Plastische Rekonstruktion	Surgeries on female genital organs: Surgeries on the vulva: Construction and reconstruction of the vulva (and perineum): Plastic reconstruction	equal	equal
4	T	oui	4	Z72.01	Beckenausgangszange mit Episiotomie	Perineal forceps with episiotomy	9415	5-738	operationen: Geburtshilfliche Operationen: Andere Operationen zur Geburtseinleitung und unter der Geburt: Episiotomie und Naht	Operations: Obstetric Operations: Other Operations for Labor Induction and During Labor: Episiotomy and Repair	equal	equal
4	T	oui	4	Z73.01	Weheneinleitung durch künstliche Blasensprengung	Induction of labor by artificial rupture of membranes	9390	5-730	operationen: Geburtshilfliche Operationen: Andere Operationen zur Geburtseinleitung und unter der Geburt: Künstliche Fruchtblasensprengung [Amniotomie]	Operations: Obstetric Operations: Other operations for labor induction and during labor: Artificial rupture of membranes [Amniotomy]	equal	equal
4	T	oui	4	Z73.92	Reposition einer vorgefallenen Nabelschnur	Umbilical cord repositioning	9423	5-739.2	operationen: Geburtshilfliche Operationen: Andere Operationen zur Geburtseinleitung und unter der Geburt: Andere Operationen zur Unterstützung der Geburt: Rückverlagerung einer prolabierten Nabelschnur	Operations: Obstetric Operations: Other operations for induction of labor and during labor: Other operations to assist delivery: Retraction of a prolapsed umbilical cord	equal	equal
6	T	oui	6	Z74.1X.10	Tiefe zervikale Sectio caesarea, primär	Deep cervical cesarean section, primary	9428	5-740.0	operationen: Geburtshilfliche Operationen: Sectio caesarea und Entwicklung des Kindes: Klassische Sectio caesarea: Primär	Operations: Obstetric Operations: Cesarean section and Child Development: Classical Cesarean Section: Primary	equal	equal
3	T	oui	3	Z74.3	Entfernen einer extratubären, ektopischen Schwangerschaft	Removal of an extrauterine, ectopic pregnancy	9451	5-744	operationen: Geburtshilfliche Operationen: Sectio caesarea und Entwicklung des Kindes: Operationen bei Extrauteringravidität	Operations: Obstetric Operations: Cesarean section and fetal development: Operations in case of ectopic pregnancy	equal	equal
4	T	oui	4	Z75.51	Naht eines frischen geburtsbedingten Risses der Zervix	Suture of a fresh birth-related cervical tear	8966	5-675.0	operationen: Operationen an den weiblichen Genitalorganen: Operationen an der Cervix uteri: Andere Rekonstruktion der Cervix uteri: Naht (nach Verletzung)	operations: Operations on female genital organs: Operations on the cervix uteri: Other cervical reconstruction: Suture (after injury)	equal	equal
4	T	oui	4	Z75.92	Evakuation eines anderen Hämatoms von Vulva oder Vagina	Evacuation of another hematoma from the vulva or vagina	9527	5-759.1	operationen: Geburtshilfliche Operationen: Andere geburtshilfliche Operationen: Andere geburtshilfliche Operationen: Entleerung eines Hämatoms an Vulva, Perineum und/oder paravaginalem Gewebe	Operations: Obstetric Operations: Other Obstetric Operations: Other Obstetric Operations: Drainage of a hematoma at the vulva, perineum and/or paravaginal tissue	equal	equal
4	T	oui	4	Z75.A2	Fetale Pulsoxymetrie	Fetal Pulse Oximetry	15860	8-720	nicht operative therapeutische massnahmen: Maßnahmen für das Atmungssystem: Sauerstoffzufuhr: Sauerstoffzufuhr bei Neugeborenen	Non-operative therapeutic measures: Respiratory system measures: Oxygen supply: Oxygen supply in newborns	equal	equal
6	T	oui	6	Z75.B1.14	Ultraschallgesteuerte Chorionzottenbiopsie	Ultrasound-guided chorionic villus biopsy	512	1-473.0	diagnostische massnahmen: Biopsie ohne Inzision: Biopsie ohne Inzision an weiblichen Genitalorganen: Biopsie ohne Inzision am graviden Uterus mit Steuerung durch bildgebende Verfahren: Chorionzotten, perkutan	Diagnostic measures: Biopsy without incision: Biopsy without incision on female genital organs: Biopsy without incision on the pregnant uterus with guidance by imaging procedures: Chorionic villi, percutaneous.	equal	equal
6	T	oui	6	Z75.B2.12	Laryngoskopie und Tracheoskopie am Fetus	Laryngoscopy and tracheoscopy on the fetus	9502	5-755.9	operationen: Geburtshilfliche Operationen: Andere geburtshilfliche Operationen: Andere intrauterine Operationen am Fetus: Eröffnung eines Kehlkopf- oder Luftröhrenverschlusses	Operations: Obstetric Operations: Other Obstetric Operations: Other Intrauterine Fetal Operations: Opening of a laryngeal or tracheal stenosis	equal	equal
6	T	oui	6	Z76.11.10	Geschlossene (Nadel-) Biopsie an Gesichtsschädelknochen	Closed biopsy of facial skull bone	730	1-510.9	diagnostische massnahmen: Biopsie durch Inzision: Biopsie an Nervengewebe, Hypophyse, Corpus pineale durch Inzision und Trepanation von Schädelknochen: Biopsie an intrakraniellem Gewebe durch Inzision und Trepanation von Schädelknochen: Gesichtsschädel	Diagnostic measures: Incisional biopsy: Biopsy of nerve tissue, pituitary gland, pineal body through incision and trepanation of skull bone: Biopsy of intracranial tissue through incision and trepanation of skull bone: Facial skull	equal	wider
6	T	oui	6	Z76.19.12	Arthroskopische Biopsie am Kiefergelenk	Arthroscopic biopsy of the temporomandibular joint	554	1-482.0	diagnostische massnahmen: Biopsie ohne Inzision: Biopsie ohne Inzision an Knochen und Gelenken: Arthroskopische Biopsie an Gelenken: Kiefergelenk	Diagnostic measures: Incisionless biopsy: Incisionless biopsy of bone and joints: Arthroscopic biopsy of joints: Temporomandibular joint	equal	equal
6	T	oui	6	Z76.2X.10	Dekortikation eines Gesichtsschädelknochens	Debridement of facial skull bone	9531	5-76...5-77	operationen: Operationen an Kiefer- und Gesichtsschädelknochen	Operations on jaw and facial skull bones	equal	inexact
6	T	oui	6	Z76.31.21	Partielle Mandibulektomie, mit Kontinuitätsdurchtrennung und alloplastischer Rekonstruktion	Partial mandibulectomy, with continuity disruption and alloplastic reconstruction	4377	5-278.1	operationen: Operationen an Mundhöhle und Gesicht: Andere Operationen an Mund und Gesicht: Resektion der Wange mit plastischer Rekonstruktion: Durch temporäre Mandibulotomie	operations: Operations on oral cavity and face: Other operations on mouth and face: Resection of the cheek with plastic reconstruction: Through temporary mandibulotomy	equal	equal
6	T	oui	6	Z76.39.10	Partielle Ostektomie an anderen Gesichtsschädelknochen, Rekonstruktion mit mikrovaskulär-anastomosiertem Transplantat	Partial ostectomy of other facial skull bones, reconstruction with microvascularly anastomosed transplant	9807	5-77b.4	operationen: Operationen an Kiefer- und Gesichtsschädelknochen: Andere Operationen an Gesichtsschädelknochen: Knochentransplantation und -transposition an Kiefer- und Gesichtsschädelknochen: Knochentransplantation, gefäßgestielt mit mikrovaskulärer Anastomose	Surgeries on jaw and facial skull bones: Other surgeries on facial skull bones: Bone transplantation and transposition of jaw and facial skull bones: Bone transplantation with microvascular anastomosis.	equal	equal
6	T	oui	6	Z76.61.20	Geschlossene Osteoplastik [Osteotomie] am Ramus mandibulae, mit Distraktion	Closed osteoplasty [osteotomy] of the mandibular ramus, with distraction	9780	5-779.5	operationen: Operationen an Kiefer- und Gesichtsschädelknochen: Andere Operationen an Gesichtsschädelknochen: Andere Operationen an Kiefergelenk und Gesichtsschädelknochen: Entfernung eines Distraktors	operations: Operations on jaw and facial skull bones: Other operations on facial skull bones: Other operations on temporomandibular joint and facial skull bones: Removal of a distractor	equal	equal
6	T	oui	6	Z76.66.22	Osteotomie der Maxilla in der Le-Fort-I-Ebene in drei oder mehr Stücken mit Distraktion	Maxillary osteotomy at the Le Fort I level in three or more pieces with distraction	9757	5-777.5	operationen: Operationen an Kiefer- und Gesichtsschädelknochen: Andere Operationen an Gesichtsschädelknochen: Osteotomie zur Verlagerung des Mittelgesichtes: In der Le-Fort-I-Ebene in drei oder mehr Stücken	Operations on jaw and facial skull bones: Other operations on facial skull bones: Osteotomy for midface advancement: In the Le Fort I plane in three or more pieces	equal	equal
6	T	oui	6	Z76.79.30	Sonstige offene Reposition einer nasoethmoidalen Mittelgesichtsfraktur	Other open repositioning of a nasoehtmoid midface fracture	9548	5-761.4	operationen: Operationen an Kiefer- und Gesichtsschädelknochen: Operationen bei Gesichtsschädelfrakturen: Reposition einer zentralen Mittelgesichtsfraktur: Nasoethmoidal, offen	operations: Operations on jaw and facial skull bones: Operations for facial skull fractures: repositioning of a central midface fracture: nasoethmoidal, open	equal	equal
6	T	oui	6	Z76.92.31	Einsetzen eines CAD-Implantats an Maxilla, zur plastischen Rekonstruktion eines grossen oder komplexen Defekts	Placement of a CAD implant in the maxilla for the plastic reconstruction of a large or complex defect	9717	5-774.72	operationen: Operationen an Kiefer- und Gesichtsschädelknochen: Andere Operationen an Gesichtsschädelknochen: Plastische Rekonstruktion und Augmentation der Maxilla: Durch alloplastische Implantate: Mit computerassistiert vorgefertigtem Implantat [Computer assisted design-Implantat], großer oder komplexer Defekt	operations: Operations on jaw and facial skull bones: Other operations on facial skull bones: Plastic reconstruction and augmentation of the maxilla: With alloplastic implants: Using a computer-assisted prefabricated implant [Computer assisted design-Implantat], large or complex defect	equal	equal
6	T	oui	6	Z77.05.99	Sequestrektomie an Femur, sonstige	Femoral sequestrectomy, other	9825	5-780.7	operationen: Operationen an den Bewegungsorganen: Operationen an anderen Knochen: Inzision am Knochen, septisch und aseptisch: Sequesterotomie	Surgeries on the locomotor system: Surgeries on other bones: Incision on bone, septic and aseptic: Sequestrectomy	equal	equal
6	T	oui	6	Z77.11.13	Knocheninzision an Skapula und Klavikula, Drainage	Bone incision at scapula and clavicle, drainage	9820	5-780.2	operationen: Operationen an den Bewegungsorganen: Operationen an anderen Knochen: Inzision am Knochen, septisch und aseptisch: Drainage	Surgeries: Surgeries on the musculoskeletal system: Surgeries on other bones: Incision on bone, septic and aseptic: Drainage	equal	equal
6	T	oui	6	Z77.19.42	Knocheninzision an den Phalangen des Fusses, Einlage und Entfernung eines Medikamententrägers	Bone incision at the phalanges of the foot, insertion and removal of a drug carrier	9822	5-780.4	operationen: Operationen an den Bewegungsorganen: Operationen an anderen Knochen: Inzision am Knochen, septisch und aseptisch: Einlegen eines Medikamententrägers	operations on the locomotor system: operations on other bones: incision in bone, septic and aseptic: insertion of a drug carrier	equal	equal
6	T	oui	6	Z77.37.20	Rotationsosteotomie an der Fibula	Fibular rotation osteotomy	9836	5-781.5	operationen: Operationen an den Bewegungsorganen: Operationen an anderen Knochen: Osteotomie und Korrekturosteotomie: Valgisierende (De-)Rotationsosteotomie	Surgeries on the locomotor system: Surgeries on other bones: Osteotomy and corrective osteotomy: Valgus (de-)rotation osteotomy	equal	equal
6	T	oui	6	Z77.39.40	Korrekturosteotomie an Phalangen des Fusses	Corrective osteotomy of foot phalanges	9965	5-788.5	operationen: Operationen an den Bewegungsorganen: Operationen an anderen Knochen: Operationen an Metatarsale und Phalangen des Fußes: Osteotomie	Surgeries on the locomotor system: Surgeries on other bones: Surgeries on metatarsals and phalanges of the foot: Osteotomy	equal	equal
4	T	oui	4	Z77.56	Plastische Rekonstruktion bei Hammerzehe	Plastic reconstruction for hammertoe	9998	5-788.7	operationen: Operationen an den Bewegungsorganen: Operationen an anderen Knochen: Operationen an Metatarsale und Phalangen des Fußes: Naht oder Plastik der plantaren Platte eines Metatarsophalangealgelenkes	Surgeries on the locomotor system: Surgeries on other bones: Surgeries on metatarsals and phalanges of the foot: Suture or plastic repair of the plantar plate of a metatarsophalangeal joint	equal	equal
6	T	oui	6	Z77.69.20	Débridement an Phalangen der Hand	Debridement of hand phalanges	11170	5-840.4	operationen: Operationen an den Bewegungsorganen: Operationen an der Hand: Operationen an Sehnen der Hand: Debridement	Surgeries: Surgeries on the musculoskeletal system: Hand surgeries: Tendon surgeries of the hand: Debridement	equal	equal
4	T	oui	4	Z77.75	Knochenentnahme am Femur zur Transplantation	Bone harvest from the femur for transplantation	9858	5-783	operationen: Operationen an den Bewegungsorganen: Operationen an anderen Knochen: Entnahme eines Knochentransplantates	surgeries: Surgeries on the locomotor system: Surgeries on other bones: Bone graft harvest	equal	equal
6	T	oui	6	Z78.12.11	Offene Reposition einer proximalen Humerusfraktur mit Knochenfixation durch Fixateur externe	Open repositioning of a proximal humerus fracture with fixation by external fixator	15206	8-200.1	nicht operative therapeutische massnahmen: Geschlossene Reposition und Korrektur von Deformitäten: Geschlossene Reposition einer Fraktur und Gelenkluxation ohne Osteosynthese: Geschlossene Reposition einer Fraktur ohne Osteosynthese: Humerus proximal	Non-operative therapeutic measures: Closed reduction and correction of deformities: Closed reduction of a fracture and joint dislocation without osteosynthesis: Closed reduction of a fracture without osteosynthesis: Proximal humerus	equal	equal
6	T	oui	6	Z78.23.10	Temporäre Epiphyseodese an Radius und Ulna	Temporary epiphysiodesis of radius and ulna	10007	5-789.1	operationen: Operationen an den Bewegungsorganen: Operationen an anderen Knochen: Andere Operationen am Knochen: Epiphyseodese, temporär	Surgeries on the musculoskeletal system: Surgeries on other bones: Other bone surgeries: Epiphysiodesis, temporary	equal	equal
6	T	oui	6	Z78.24.00	Verkürzungsosteotomie an Karpalia und Metakarpalia, n.n.bez.	Shortening osteotomy of the carpals and metacarpals, unspecified.	11177	5-840.b	operationen: Operationen an den Bewegungsorganen: Operationen an der Hand: Operationen an Sehnen der Hand: Verkürzung	surgeries: Surgeries of the locomotor system: Hand surgeries: Tendon surgeries of the hand: Shortening	equal	equal
6	T	oui	6	Z78.52.10	Revision von Osteosynthesematerial ohne Materialersatz am Humerus	Revision of osteosynthesis material without material replacement at the humerus	10009	5-789.3	operationen: Operationen an den Bewegungsorganen: Operationen an anderen Knochen: Andere Operationen am Knochen: Revision von Osteosynthesematerial ohne Materialwechsel	Surgeries on the musculoskeletal system: Surgeries on other bones: Other bone surgeries: Revision of osteosynthesis material without material exchange	equal	equal
6	T	oui	5	Z78.65.02	Knochenimplantatentfernung am Femur (Schenkelhals / proximal / distal, ausser Schaft), Marknagel mit Gelenkkomponente, Verriegelungsnagel, Transfixationsnagel	Bone implant removal from the femur (neck/proximal/distal, excluding shaft), intramedullary nail with joint component, locking nail, transfixing nail	9929	5-787.6	operationen: Operationen an den Bewegungsorganen: Operationen an anderen Knochen: Entfernung von Osteosynthesematerial: Marknagel	surgeries: Surgeries on the musculoskeletal system: Surgeries on other bones: Removal of osteosynthesis material: Intramedullary nail	equal	equal
4	T	oui	4	Z79.08	Geschlossene Reposition einer Zehenfraktur ohne innere Knochenfixation	Closed reduction of a toe fracture without internal fixation	15262	8-201.r	nicht operative therapeutische massnahmen: Geschlossene Reposition und Korrektur von Deformitäten: Geschlossene Reposition einer Fraktur und Gelenkluxation ohne Osteosynthese: Geschlossene Reposition einer Gelenkluxation ohne Osteosynthese: Zehengelenk	Non-operative therapeutic measures: Closed reduction and correction of deformities: Closed reduction of a fracture and joint dislocation without osteosynthesis: Closed reduction of a joint dislocation without osteosynthesis: Toe joint	equal	equal
6	T	oui	6	Z79.36.51	Offene Reposition einer Mehrfragmentfraktur der proximalen Fibula mit innerer Knochenfixation	Open repositioning of a multi-fragment fracture of the proximal fibula with internal fixation	10134	5-794.7	operationen: Operationen an den Bewegungsorganen: Reposition von Fraktur und Luxation: Offene Reposition einer Mehrfragment-Fraktur im Gelenkbereich eines langen Röhrenknochens: Durch Materialkombinationen	Surgeries on the locomotor system: Fracture and dislocation repositioning: Open repositioning of a multifragment fracture in the joint area of a long tubular bone: Using material combinations	equal	equal
6	T	oui	6	Z79.59.10	Offene Reposition einer Epiphysendiastase an der Patella	Open repositioning of a patellar epiphyseal diastasis	10326	5-804.3	operationen: Operationen an den Bewegungsorganen: Offen chirurgische und andere Gelenkoperationen: Offen chirurgische Operationen an der Patella und ihrem Halteapparat: Verlagerung des Patellarsehnenansatzes mit Knochenspan	Surgeries on the locomotor system: Open surgical and other joint surgeries: Open surgical procedures on the patella and its supporting apparatus: Relocation of the patellar tendon insertion with bone graft	equal	equal
4	T	oui	4	Z79.66	Débridement einer offenen Fraktur an Tibia und Fibula	Debridement of an open fracture of the tibia and fibula	10255	5-800.3	operationen: Operationen an den Bewegungsorganen: Offen chirurgische und andere Gelenkoperationen: Offen chirurgische Operation eines Gelenkes: Debridement	Surgeries: Surgeries on the locomotor system: Open surgical and other joint surgeries: Open surgical joint surgery: Debridement	equal	equal
6	T	oui	6	Z7A.28.41	Osteotomie an der Wirbelsäule, Grad IV	Spinal osteotomy, Grade IV	10986	5-836.35	operationen: Operationen an den Bewegungsorganen: Operationen an der Wirbelsäule: Spondylodese: Dorsal: 4 Segmente	Surgeries: Surgeries on the musculoskeletal system: Spine surgeries: Spinal fusion: Dorsal: 4 segments	equal	equal
6	T	oui	6	Z7A.51.09	Knochentransplantation und Knochentransposition an der Wirbelsäule, sonstige	Bone transplantation and bone transposition of the spine, other	9869	5-784	operationen: Operationen an den Bewegungsorganen: Operationen an anderen Knochen: Knochentransplantation und -transposition	surgeries: Surgeries on the musculoskeletal system: Surgeries on other bones: Bone transplantation and transposition	equal	equal
6	T	oui	6	Z7A.51.15	Knochentransplantation an der Wirbelsäule, allogen und xenogen, Spongiosa und kortikospongiöser Span	Bone transplantation in the spine, allogeneic and xenogeneic, spongiosa and corticospongious graft	10975	5-835.d1	operationen: Operationen an den Bewegungsorganen: Operationen an der Wirbelsäule: Knochenersatz an der Wirbelsäule: Verwendung von allogenem Knochentransplantat: Mit Anreicherung von Knochenwachstumszellen	operations on the musculoskeletal system: operations on the spine: bone grafting of the spine: use of allogeneic bone graft: with enrichment of bone growth cells	equal	equal
6	T	oui	6	Z7A.61.11	Implantation partielle Bandscheibenprothese	Partial disc prosthesis implantation	11065	5-839.1	operationen: Operationen an den Bewegungsorganen: Operationen an der Wirbelsäule: Andere Operationen an der Wirbelsäule: Implantation einer Bandscheibenendoprothese	operations: Operations on the musculoskeletal system: Spinal surgery: Other spinal surgeries: Implantation of a disc prosthesis	equal	equal
6	T	oui	6	Z7A.64.21	Implantation Wirbelkörperersatzprothese bei einem Prothesenwechsel	Implantation of vertebral body replacement prosthesis during a prosthesis exchange	10584	5-821.16	operationen: Operationen an den Bewegungsorganen: Endoprothetischer Gelenk- und Knochenersatz: Revision, Wechsel und Entfernung einer Endoprothese am Hüftgelenk: Wechsel einer Femurkopfprothese: In Duokopfprothese	Surgeries on the musculoskeletal system: Joint and bone replacement surgery: Revision, exchange, and removal of a prosthesis at the hip joint: Exchange of a femoral head prosthesis: To a dual-head prosthesis	equal	equal
6	T	oui	6	Z7A.71.11	Fusion von Wirbeln mit Stabilisierung der Wirbelsäule, Zugang dorsal und dorsolateral, 1 Segment	Fusion of vertebrae with spinal stabilization, dorsal and dorsolateral approach, 1 segment	10983	5-836.30	operationen: Operationen an den Bewegungsorganen: Operationen an der Wirbelsäule: Spondylodese: Dorsal: 1 Segment	Surgeries: Surgeries on the musculoskeletal system: Spine surgeries: Spinal fusion: Dorsal: 1 segment	equal	equal
6	T	oui	6	Z80.01.09	Arthrotomie zur Prothesenentfernung an der Schulter, sonstige	Arthroscopy for prosthesis removal from the shoulder, other	10810	5-825.8	operationen: Operationen an den Bewegungsorganen: Endoprothetischer Gelenk- und Knochenersatz: Revision, Wechsel und Entfernung einer Endoprothese an Gelenken der oberen Extremität: Entfernung einer Totalendoprothese Schultergelenk	Surgeries on the musculoskeletal system: Joint and bone replacement surgery: Revision, exchange, and removal of a prosthesis at joints of the upper extremity: Removal of a total shoulder arthroplasty	equal	equal
6	T	oui	6	Z80.01.33	Entfernen Glenoidprothese	Remove glenoid prosthesis	10820	5-825.j	operationen: Operationen an den Bewegungsorganen: Endoprothetischer Gelenk- und Knochenersatz: Revision, Wechsel und Entfernung einer Endoprothese an Gelenken der oberen Extremität: Entfernung einer Glenoidprothese	Surgeries on the musculoskeletal system: Joint and bone replacement surgery: Revision, exchange, and removal of a prosthesis at joints of the upper extremity: Removal of a glenoid prosthesis	equal	equal
4	T	oui	4	Z80.25	Arthroskopie der Hüfte	Hip arthroscopy	1110	1-697.6	diagnostische massnahmen: Diagnostische Endoskopie: Diagnostische Endoskopie durch Inzision und intraoperativ: Diagnostische Arthroskopie: Hüftgelenk	Diagnostic measures: Diagnostic endoscopy: Diagnostic endoscopy via incision and intraoperatively: Diagnostic arthroscopy: Hip joint	equal	equal
6	T	oui	6	Z80.37.30	Offene Gelenkbiopsie am Sprunggelenk	Open joint biopsy of the ankle	591	1-484.8	diagnostische massnahmen: Biopsie ohne Inzision: Biopsie ohne Inzision an Knochen und Gelenken: Perkutane Biopsie an Gelenken und Schleimbeuteln mit Steuerung durch bildgebende Verfahren: Oberes Sprunggelenk	Diagnostic measures: * Incisionless biopsy: Incisionless biopsy of bone and joints * Percutaneous biopsy of joints and bursae guided by imaging procedures: Ankle joint	equal	equal
6	T	oui	6	Z80.41.10	Durchtrennung von Gelenkskapsel, Ligament oder Knorpel am Humeroglenoidalgelenk	Dissection of joint capsule, ligament, or cartilage at the glenohumeral joint	10334	5-805	operationen: Operationen an den Bewegungsorganen: Offen chirurgische und andere Gelenkoperationen: Offen chirurgische Refixation und Plastik am Kapselbandapparat des Schultergelenkes	Surgeries on the musculoskeletal system: Open surgical and other joint surgeries: Open surgical fixation and reconstruction of the shoulder joint capsule apparatus.	equal	equal
6	T	oui	6	Z80.6X.10	Meniskektomie am Knie, arthroskopisch, partiell	Partial meniscectomy of the knee, arthroscopically	10461	5-812.5	operationen: Operationen an den Bewegungsorganen: Arthroskopische Gelenkoperationen: Arthroskopische Operation am Gelenkknorpel und an den Menisken: Meniskusresektion, partiell	Surgeries: Surgeries on the locomotor system: Arthroscopic joint surgeries: Arthroscopic surgery of the articular cartilage and menisci: Partial meniscus resection	equal	equal
6	T	oui	6	Z80.79.11	Arthroskopische Synovektomie am Iliosakralgelenk	Arthroscopic synovectomy of the sacroiliac joint	10436	5-81	operationen: Operationen an den Bewegungsorganen: Arthroskopische Gelenkoperationen	Surgeries on the locomotor system: Arthroscopic joint surgeries	equal	equal
6	T	oui	6	Z80.80.11	Sonstige lokale Exzision oder Destruktion einer Gelenksläsion, ohne Angabe der Lokalisation, Débridement	Other local excision or destruction of a joint lesion, without specifying location, debridement	11755	5-894.0	operationen: Operationen an Haut und Unterhaut: Operationen an Haut und Unterhaut: Lokale Exzision von erkranktem Gewebe an Haut und Unterhaut: Ohne primären Wundverschluss	Operations on skin and subcutaneous tissue: Operations on skin and subcutaneous tissue: Local excision of diseased tissue in skin and subcutaneous tissue: Without primary wound closure	equal	equal
6	T	oui	6	Z80.85.12	Zystenexstirpation am Hüftgelenk	Cyst excision at the hip joint	10261	5-800.9	operationen: Operationen an den Bewegungsorganen: Offen chirurgische und andere Gelenkoperationen: Offen chirurgische Operation eines Gelenkes: Zystenexstirpation	operations: Operations on the locomotor system: Open surgical and other joint operations: Open surgical operation of a joint: Cyst excision	equal	equal
6	T	oui	6	Z80.86.13	Exzision eines Meniskusganglions am Kniegelenk	Excision of a meniscus ganglion at the knee joint	10274	5-801.8	operationen: Operationen an den Bewegungsorganen: Offen chirurgische und andere Gelenkoperationen: Offen chirurgische Operation am Gelenkknorpel und an den Menisken: Exzision eines Meniskusganglions	Surgeries on the locomotor system: Open surgical and other joint surgeries: Open surgical operations on articular cartilage and menisci: Excision of a meniscus ganglion.	equal	equal
6	T	oui	6	Z81.12.99	Arthrodese Double, sonstige	Arthrodesis double, other	10380	5-808	operationen: Operationen an den Bewegungsorganen: Offen chirurgische und andere Gelenkoperationen: Offen chirurgische Arthrodese	Surgeries: Surgeries on the locomotor system: Open surgical and other joint surgeries: Open surgical arthrodesis	equal	equal
4	T	oui	4	Z81.16	Metatarsophalangeale Arthrodese	Metatarsophalangeal arthrodesis	9986	5-788.60	operationen: Operationen an den Bewegungsorganen: Operationen an anderen Knochen: Operationen an Metatarsale und Phalangen des Fußes: Arthroplastik: Metatarsophalangealgelenk, Digitus I	Surgeries: Surgeries on the locomotor system: Surgeries on other bones: Surgeries on metatarsals and phalanges of the foot: Arthroplasty: Metatarsophalangeal joint, Digit I	equal	equal
6	T	oui	6	Z81.40.10	Refixation eines osteochondralen Fragmentes am Hüftgelenk, arthroskopisch	Refixation of an osteochondral fragment at the hip joint, arthroscopically	10269	5-801.3	operationen: Operationen an den Bewegungsorganen: Offen chirurgische und andere Gelenkoperationen: Offen chirurgische Operation am Gelenkknorpel und an den Menisken: Refixation eines osteochondralen Fragmentes	Surgeries on the locomotor system: Open surgical and other joint surgeries: Open surgical operations on articular cartilage and menisci: Fixation of an osteochondral fragment	equal	equal
6	T	oui	6	Z81.40.16	Knorpelglättung am Hüftgelenk, arthroskopisch	Cartilage smoothing at the hip joint, arthroscopically	10547	5-816.1	operationen: Operationen an den Bewegungsorganen: Arthroskopische Gelenkoperationen: Arthroskopische Operationen am Labrum acetabulare: Glättung und (Teil-)Resektion	Surgeries on the locomotor system: Arthroscopic joint surgeries: Arthroscopic surgeries on the acetabular labrum: Smoothing and (partial) resection	equal	equal
6	T	oui	6	Z81.40.20	Subchondrale Knocheneröffnung am Hüftgelenk mit Einbringen eines azellulären Implantats, arthroskopisch	Subchondral bone opening at the hip joint with insertion of an acellular implant, arthroscopically	10472	5-812.g	operationen: Operationen an den Bewegungsorganen: Arthroskopische Gelenkoperationen: Arthroskopische Operation am Gelenkknorpel und an den Menisken: Subchondrale Knocheneröffnung mit Einbringen eines azellulären Implantates	Surgeries on the locomotor system: Arthroscopic joint surgeries: Arthroscopic surgery of the articular cartilage and menisci: Subchondral bone opening with implantation of an acellular implant	equal	equal
6	T	oui	6	Z81.44.13	Stabilisierung der Patella, Verlagerung des Patellarsehnenansatzes mit Knochenspan	Patellar stabilization, relocation of the patellar tendon insertion with bone graft	10326	5-804.3	operationen: Operationen an den Bewegungsorganen: Offen chirurgische und andere Gelenkoperationen: Offen chirurgische Operationen an der Patella und ihrem Halteapparat: Verlagerung des Patellarsehnenansatzes mit Knochenspan	Surgeries on the locomotor system: Open surgical and other joint surgeries: Open surgical procedures on the patella and its supporting apparatus: Relocation of the patellar tendon insertion with bone graft	equal	equal
6	T	oui	6	Z81.45.29	Sonstige Rekonstruktion an den Kreuzbändern, offen chirurgisch	Other reconstruction of the cruciate ligaments, open surgery	10306	5-803	operationen: Operationen an den Bewegungsorganen: Offen chirurgische und andere Gelenkoperationen: Offen chirurgische Bandplastik am Kniegelenk	Surgeries: Surgeries on the locomotor system: Open surgical and other joint surgeries: Open surgical ligament reconstruction of the knee joint	equal	equal
6	T	oui	6	Z81.47.30	Sonstige Refixation und Naht am Kapselbandapparat des Kniegelenks	Other fixation and suture of the capsule ligament apparatus of the knee joint	10497	5-813.c	operationen: Operationen an den Bewegungsorganen: Arthroskopische Gelenkoperationen: Arthroskopische Refixation und Plastik am Kapselbandapparat des Kniegelenkes: Naht des dorsalen Kapselbandapparates	Surgeries on the locomotor system: Arthroscopic joint surgeries: Arthroscopic fixation and reconstruction of the capsule ligaments of the knee joint: Suture of the dorsal capsule ligament apparatus.	equal	equal
6	T	oui	6	Z81.49.11	Refixation eines osteochondralen Fragmentes, oberes Sprunggelenk, offen chirurgisch	Open surgical fixation of an osteochondral fragment, upper ankle joint	10269	5-801.3	operationen: Operationen an den Bewegungsorganen: Offen chirurgische und andere Gelenkoperationen: Offen chirurgische Operation am Gelenkknorpel und an den Menisken: Refixation eines osteochondralen Fragmentes	Surgeries on the locomotor system: Open surgical and other joint surgeries: Open surgical operations on articular cartilage and menisci: Fixation of an osteochondral fragment	equal	equal
6	T	oui	6	Z81.51.12	Erstimplantation einer Totalendoprothese des Hüftgelenks, Sonderprothese	Primary implantation of a total hip arthroplasty, special prosthesis	10559	5-820	operationen: Operationen an den Bewegungsorganen: Endoprothetischer Gelenk- und Knochenersatz: Implantation einer Endoprothese am Hüftgelenk	Surgeries on the musculoskeletal system: Joint and bone replacement with prostheses: Implantation of a prosthesis at the hip joint	equal	equal
6	T	oui	6	Z81.52.21	Erstimplantation einer Monokopfprothese	Primary implantation of a mono-block prosthesis	10559	5-820	operationen: Operationen an den Bewegungsorganen: Endoprothetischer Gelenk- und Knochenersatz: Implantation einer Endoprothese am Hüftgelenk	Surgeries on the musculoskeletal system: Joint and bone replacement with prostheses: Implantation of a prosthesis at the hip joint	equal	inexact
6	T	oui	6	Z81.54.26	Erstimplantation eines kondylären Femurschilds mit Patella-Rückflächenersatz	Primary implantation of a condylar femoral shield with patellar posterior surface replacement	10655	5-822	operationen: Operationen an den Bewegungsorganen: Endoprothetischer Gelenk- und Knochenersatz: Implantation einer Endoprothese am Kniegelenk	Surgeries on the musculoskeletal system: Joint and bone replacement with prostheses: Implantation of a prosthesis at the knee joint	equal	equal
6	T	oui	6	Z81.82.31	Refixation des Labrum glenoidale, arthroskopisch	Arthroscopic labrum glenoidale refixation	10509	5-814.1	operationen: Operationen an den Bewegungsorganen: Arthroskopische Gelenkoperationen: Arthroskopische Refixation und Plastik am Kapselbandapparat des Schultergelenkes: Refixation des Labrum glenoidale durch sonstige Verfahren	Surgeries on the musculoskeletal system: Arthroscopic joint surgeries: Arthroscopic fixation and reconstruction of the shoulder joint capsule ligaments: Fixation of the glenoid labrum by other procedures	equal	equal
6	T	oui	6	Z81.92.22	Injektion von Anästhetikum und Analgetikum in oder an den Gelenken der Halswirbelsäule, zur Schmerztherapie, mit bildgebende Verfahren [BV]	Injection of anesthetic and analgesic into or around the joints of the cervical spine for pain therapy, with imaging guidance (BV)	17944	8-917.11	nicht operative therapeutische massnahmen: Anästhesie und Schmerztherapie: Schmerztherapie: Injektion eines Medikamentes in Gelenke der Wirbelsäule zur Schmerztherapie: Mit bildgebenden Verfahren: An den Gelenken der Halswirbelsäule	Non-operative therapeutic measures: Anesthesia and pain therapy: Pain therapy: Injection of a medication into the joints of the spine for pain therapy: With imaging procedures: At the joints of the cervical spine	equal	equal
6	T	oui	6	Z81.93.10	Naht des Bandapparates der Klavikula	Suture of the clavicular ligament apparatus	10372	5-807.6	operationen: Operationen an den Bewegungsorganen: Offen chirurgische und andere Gelenkoperationen: Offen chirurgische Refixation am Kapselbandapparat anderer Gelenke: Naht des Bandapparates der Klavikula mit Schrauben- oder Drahtfixation	Surgeries on the musculoskeletal system: Open surgical and other joint surgeries: Open surgical refixation of the capsule ligament apparatus of other joints: Suturing of the ligament apparatus of the clavicle with screw or wire fixation	equal	equal
6	T	oui	6	Z81.97.14	Revision und Wechsel einer Radiuskopfprothese	Revision and exchange of a radial head prosthesis	10805	5-825.3	operationen: Operationen an den Bewegungsorganen: Endoprothetischer Gelenk- und Knochenersatz: Revision, Wechsel und Entfernung einer Endoprothese an Gelenken der oberen Extremität: Wechsel einer Radiuskopfprothese	Surgeries on the musculoskeletal system: Joint and bone replacement surgery: Revision, exchange, and removal of a prosthesis at joints of the upper extremity: Exchange of a radial head prosthesis	equal	equal
6	T	oui	6	Z81.9A.1E	Knorpeltransplantation und Implantation von in-vitro hergestellten Gewebekulturen, oberes Sprunggelenk, arthroskopisch	Cartilage transplantation and implantation of in vitro cultivated tissue cultures, upper ankle joint, arthroscopically	10278	5-801.c	operationen: Operationen an den Bewegungsorganen: Offen chirurgische und andere Gelenkoperationen: Offen chirurgische Operation am Gelenkknorpel und an den Menisken: Implantation von in vitro hergestellten Gewebekulturen	Surgeries on the locomotor system: Open surgical and other joint surgeries: Open surgical operations on articular cartilage and menisci: Implantation of in vitro cultivated tissue cultures	equal	equal
6	T	oui	6	Z81.9A.5J	Knorpeltransplantation mit OATS [osteoarticular transfer system]-Verfahren, Mosaikplastik, sonstige Gelenke, arthroskopisch	Cartilage transplantation with OATS (osteoarticular transfer system) technique, mosaic plasty, other joints, arthroscopically	10277	5-801.b	operationen: Operationen an den Bewegungsorganen: Offen chirurgische und andere Gelenkoperationen: Offen chirurgische Operation am Gelenkknorpel und an den Menisken: Knorpeltransplantation	Surgeries: Surgeries on the musculoskeletal system: Open surgical and other joint surgeries: Open surgical procedures on articular cartilage and menisci: Cartilage transplantation	equal	equal
4	T	oui	4	Z82.22	Exzision einer Läsion an einem Handmuskel	Excision of a lesion in a hand muscle	11311	5-849.4	operationen: Operationen an den Bewegungsorganen: Operationen an der Hand: Andere Operationen an der Hand: Radikale Exzision von erkranktem Gewebe mit spezieller Gefäß- und Nervenpräparation	Surgeries on the musculoskeletal system: Surgeries on the hand: Other surgeries on the hand: Radical excision of diseased tissue with special vessel and nerve preparation	equal	equal
6	T	oui	6	Z82.39.10	Sonstige Exzision von Weichteilen der Hand, Exzision von Sehnenscheiden der Hand	Other excision of soft tissues of the hand, excision of tendon sheaths of the hand	11311	5-849.4	operationen: Operationen an den Bewegungsorganen: Operationen an der Hand: Andere Operationen an der Hand: Radikale Exzision von erkranktem Gewebe mit spezieller Gefäß- und Nervenpräparation	Surgeries on the musculoskeletal system: Surgeries on the hand: Other surgeries on the hand: Radical excision of diseased tissue with special vessel and nerve preparation	equal	equal
6	T	oui	6	Z82.51.11	Verlängerung einer Sehne der Hand	Tendon lengthening of the hand	11233	5-843.a	operationen: Operationen an den Bewegungsorganen: Operationen an der Hand: Operationen an Muskeln der Hand: Verlängerung	operations: Operations on the locomotor system: Hand operations: Muscle operations of the hand: Lengthening	equal	equal
4	T	oui	4	Z82.56	Sonstiger Transfer oder Transplantation einer Sehne der Hand	Other transfer or transplantation of a hand tendon	11180	5-840.e	operationen: Operationen an den Bewegungsorganen: Operationen an der Hand: Operationen an Sehnen der Hand: Transplantation	surgeries: Surgeries on the locomotor system: Hand surgeries: Tendon surgeries of the hand: Transplantation	equal	equal
6	T	oui	6	Z82.89.14	Radialisation bei kongenitalen Anomalien der Hand	Radialization in congenital hand anomalies	11303	5-848.1	operationen: Operationen an den Bewegungsorganen: Operationen an der Hand: Operationen bei kongenitalen Anomalien der Hand: Radialisation	Surgeries: Surgeries on the locomotor system: Hand surgeries: Hand surgeries for congenital anomalies: Radialization	equal	equal
6	T	oui	6	Z83.01.12	Exploration einer Sehnenscheide, Oberarm und Ellenbogen	Exploration of the tendon sheath, upper arm and elbow	11190	5-840.s	operationen: Operationen an den Bewegungsorganen: Operationen an der Hand: Operationen an Sehnen der Hand: Exploration	operations: Operations on the locomotor system: Operations on the hand: Tendon operations of the hand: Exploration	equal	equal
6	T	oui	6	Z83.14.14	Fasziotomie oder Aponeurotomie, Brustwand, Bauch und Rücken	Fasciotomy or aponeurotomy, chest wall, abdomen, and back	11358	5-851.c	operationen: Operationen an den Bewegungsorganen: Operationen an Muskeln, Sehnen, Faszien und Schleimbeuteln: Durchtrennung von Muskel, Sehne und Faszie: Fasziotomie längs, offen chirurgisch, total, mehrere Segmente	Surgeries on the musculoskeletal system: Surgeries on muscles, tendons, fascia and synovial sheaths: Muscle, tendon and fascia sectioning: Longitudinal fasciotomy, open surgical, total, multiple segments	equal	equal
6	T	oui	6	Z83.19.23	Desinsertion von Muskel, Sehne und Faszie, Unterarm	Deinsertion of muscle, tendon, and fascia, forearm	11426	5-856	operationen: Operationen an den Bewegungsorganen: Operationen an Muskeln, Sehnen, Faszien und Schleimbeuteln: Rekonstruktion von Faszien	operations: Operations on the musculoskeletal system: Operations on muscles, tendons, fascia and synovial sheaths: Fascia reconstruction	equal	equal
6	T	oui	6	Z83.19.30	Lappenstieldurchtrennung nach Lappenplastik, Kopf und Hals	Skin flap division after skin flap surgery, head and neck	11889	5-909.2	operationen: Operationen an Haut und Unterhaut: Operative Wiederherstellung und Rekonstruktion von Haut und Unterhaut: Andere Wiederherstellung und Rekonstruktion von Haut und Unterhaut: Lappenstieldurchtrennung	operations: Operations on skin and subcutaneous tissue: Surgical restoration and reconstruction of skin and subcutaneous tissue: Other restoration and reconstruction of skin and subcutaneous tissue: Skin flap division	equal	equivalent
6	T	oui	6	Z83.21.11	Offene Biopsie an den Weichteilen	Open biopsy of soft tissues	620	1-492	diagnostische massnahmen: Biopsie ohne Inzision: Biopsie ohne Inzision an anderen Organen und Geweben: Perkutane Biopsie an Muskeln und Weichteilen mit Steuerung durch bildgebende Verfahren	Diagnostic measures: Biopsy without incision: Biopsy without incision at other organs and tissues: Percutaneous biopsy of muscles and soft tissues with image guidance.	equal	equal
6	T	oui	6	Z83.42.16	Sonstige Tenonektomie, Untere Extremität	Other tenectomy, lower extremity	11174	5-840.8	operationen: Operationen an den Bewegungsorganen: Operationen an der Hand: Operationen an Sehnen der Hand: Tenolyse	surgeries: Surgeries on the locomotor system: Hand surgeries: Tendon surgeries of the hand: Tenotomy	equal	equal
6	T	oui	6	Z83.49.25	Kompartmentresektion, Leisten- und Genitalregion und Gesäss	Compartment resection, groin and genital region, and buttocks	11376	5-852.d	operationen: Operationen an den Bewegungsorganen: Operationen an Muskeln, Sehnen, Faszien und Schleimbeuteln: Exzision an Muskel, Sehne und Faszie: Kompartmentresektion mit erweiterter Präparation	operations: Operations on the locomotor system: Operations on muscles, tendons, fascia and synovial sheaths: Excision of muscle, tendon and fascia: Compartment resection with extended preparation	equal	equal
6	T	oui	6	Z83.72.10	Sehnenrückverlagerung, Kopf und Hals	Tendon relocation, head and neck	11397	5-854	operationen: Operationen an den Bewegungsorganen: Operationen an Muskeln, Sehnen, Faszien und Schleimbeuteln: Rekonstruktion von Sehnen	operations: Operations on the musculoskeletal system: Operations on muscles, tendons, fascia and synovial sheaths: Tendon reconstruction	equal	equal
6	T	oui	6	Z83.74.11	Reinsertion eines Muskels, Schulter und Axilla	Muscle reimplantation, shoulder and axilla	11548	5-866.0	operationen: Operationen an den Bewegungsorganen: Replantation, Exartikulation und Amputation von Extremitäten und andere Operationen an den Bewegungsorganen: Revision eines Amputationsgebietes: Schulter- und Oberarmregion	Surgeries on the musculoskeletal system: Reimplantation, disarticulation and amputation of limbs and other surgeries on the musculoskeletal system: Revision of an amputation site: shoulder and upper arm region	equal	equivalent
6	T	oui	6	Z83.82.11	Faszientransplantation, Schulter und Axilla	Fascia transplantation, shoulder and axilla	11685	5-885.5	operationen: Operationen an der Mamma: Andere Operationen an der Mamma: Plastische Rekonstruktion der Mamma mit Haut- und Muskeltransplantation: Gestieltes Muskeltransplantat	Surgeries: Breast Surgeries: Other Breast Surgeries: Breast Reconstruction with Skin and Muscle Graft: Free Muscle Transfer	equal	equal
6	T	oui	6	Z83.82.24	Transplantation eines lokalen Muskel- oder Faszienlappens, Brustwand, Bauch und Rücken	Transplantation of a local muscle or fascia flap, chest wall, abdomen and back	11685	5-885.5	operationen: Operationen an der Mamma: Andere Operationen an der Mamma: Plastische Rekonstruktion der Mamma mit Haut- und Muskeltransplantation: Gestieltes Muskeltransplantat	Surgeries: Breast Surgeries: Other Breast Surgeries: Breast Reconstruction with Skin and Muscle Graft: Free Muscle Transfer	equal	equal
6	T	oui	6	Z83.82.42	Transplantation eines sonstigen Lappentransplantates mit mikrovaskulärer Anastomosierung aus Muskel oder Faszie, Oberarm und Ellenbogen	Transplantation of a different flap graft with microvascular anastomosis from muscle or fascia, upper arm and elbow	11689	5-885.9	operationen: Operationen an der Mamma: Andere Operationen an der Mamma: Plastische Rekonstruktion der Mamma mit Haut- und Muskeltransplantation: Freies lipokutanes Transplantat mit mikrovaskulärer Anastomosierung	Surgeries: Breast surgeries: Other breast surgeries: Plastic breast reconstruction with skin and muscle transplantation: Free fat graft with microvascular anastomosis	equal	equal
6	T	oui	6	Z83.85.12	Verlängerung von Muskel oder Sehne, Oberarm und Ellenbogen	Muscle or tendon lengthening, upper arm and elbow	11233	5-843.a	operationen: Operationen an den Bewegungsorganen: Operationen an der Hand: Operationen an Muskeln der Hand: Verlängerung	operations: Operations on the locomotor system: Hand operations: Muscle operations of the hand: Lengthening	equal	equal
4	T	oui	4	Z83.86	Quadrizepssehnen-Rekonstruktion	Quadriceps tendon reconstruction	11397	5-854	operationen: Operationen an den Bewegungsorganen: Operationen an Muskeln, Sehnen, Faszien und Schleimbeuteln: Rekonstruktion von Sehnen	operations: Operations on the musculoskeletal system: Operations on muscles, tendons, fascia and synovial sheaths: Tendon reconstruction	equal	equal
6	T	oui	6	Z83.88.15	Augmentation einer Sehne, Leisten- und Genitalregion und Gesäss	Tendon augmentation, groin and genital region, and buttock	11401	5-854.3	operationen: Operationen an den Bewegungsorganen: Operationen an Muskeln, Sehnen, Faszien und Schleimbeuteln: Rekonstruktion von Sehnen: Augmentation	operations: Operations on the musculoskeletal system: Operations on muscles, tendons, fascia and synovium: Tendon reconstruction: Augmentation	equal	equal
6	T	oui	6	Z83.88.23	Sehnenersatzplastik, Unterarm	Tendon replacement surgery, forearm	11549	5-866.1	operationen: Operationen an den Bewegungsorganen: Replantation, Exartikulation und Amputation von Extremitäten und andere Operationen an den Bewegungsorganen: Revision eines Amputationsgebietes: Unterarmregion	Surgeries on the musculoskeletal system: Reimplantation, disarticulation and amputation of limbs and other surgeries on the musculoskeletal system: Revision of an amputation site: forearm region	equal	equal
6	T	oui	6	Z83.89.22	Deckung eines Defekts an einer Faszie, Oberarm und Ellenbogen	Coverage of a defect in fascia, upper arm and elbow	11436	5-856.9	operationen: Operationen an den Bewegungsorganen: Operationen an Muskeln, Sehnen, Faszien und Schleimbeuteln: Rekonstruktion von Faszien: Deckung eines Defektes mit autogenem Material	Surgeries on the locomotor system: Surgeries on muscles, tendons, fascia and synovial sheaths: Fascia reconstruction: Covering a defect with autologous material	equal	equal
6	T	oui	6	Z84.03.10	Komplette Hand-Amputation an Handwurzel oder Mittelhand	Complete hand amputation at wrist or mid-hand	11505	5-863.1	operationen: Operationen an den Bewegungsorganen: Replantation, Exartikulation und Amputation von Extremitäten und andere Operationen an den Bewegungsorganen: Amputation und Exartikulation Hand: Amputation Handwurzel	Surgeries on the musculoskeletal system: Reimplantation, disarticulation and amputation of limbs and other surgeries on the musculoskeletal system: Amputation and disarticulation of the hand: Wrist amputation	equal	equal
4	T	oui	4	Z84.22	Finger-Replantation (ausser Daumen)	Finger replantation	11507	5-863.3	operationen: Operationen an den Bewegungsorganen: Replantation, Exartikulation und Amputation von Extremitäten und andere Operationen an den Bewegungsorganen: Amputation und Exartikulation Hand: Fingeramputation	Surgeries on the musculoskeletal system: Reimplantation, disarticulation and amputation of limbs and other surgeries on the musculoskeletal system: Amputation and disarticulation of the hand: finger amputation	equal	wider
6	T	oui	6	Z84.3X.13	Revision eines Amputationsstumpfes, untere Extremität	Revision of an amputation stump, lower extremity	11552	5-866.4	operationen: Operationen an den Bewegungsorganen: Replantation, Exartikulation und Amputation von Extremitäten und andere Operationen an den Bewegungsorganen: Revision eines Amputationsgebietes: Unterschenkelregion	Surgeries on the musculoskeletal system: Reimplantation, disarticulation and amputation of limbs and other surgeries on the musculoskeletal system: Revision of an amputation site: Lower leg region	equal	equal
4	T	oui	4	Z84.52	Einsetzen von rekombinantem Knochen-morphogenetischen Protein [bone morphogenetic protein, rhBMP]	Implantation of recombinant bone morphogenetic protein [rhBMP]	9888	5-785	operationen: Operationen an den Bewegungsorganen: Operationen an anderen Knochen: Implantation von alloplastischem Knochenersatz	Surgeries on the locomotor system: Surgeries on other bones: Implantation of alloplastic bone substitute	equal	equal
6	T	oui	6	Z84.53.99	Implantation von interner Verlängerungsvorrichtung der Extremitäten mit kinetischer Traktion, sonstige	Implantation of an internal limb lengthening device with kinetic traction, other	10036	5-78a.j	operationen: Operationen an den Bewegungsorganen: Operationen an anderen Knochen: Revision von Osteosynthesematerial mit Reosteosynthese: Durch internes Verlängerungs- oder Knochentransportsystem	Surgeries on the locomotor system: Surgeries on other bones: Revision of osteosynthesis material with reosynthesis: Through internal lengthening or bone transport system	equal	equal
6	T	oui	6	Z84.55.44	Einsetzen von Knochenzement ohne Antibiotikumzusatz, Karpalia und Metakarpalia	Placement of bone cement without antibiotic addition, carpals and metacarpals	9889	5-785.0	operationen: Operationen an den Bewegungsorganen: Operationen an anderen Knochen: Implantation von alloplastischem Knochenersatz: Knochenzement ohne Antibiotikumzusatz	surgeries: Surgeries on the locomotor system: Surgeries on other bones: Implantation of alloplastic bone substitute: Bone cement without antibiotic additive	equal	equal
6	T	oui	6	Z84.99.11	Sonstige Operationen bei kongenitalen Anomalien der sonstigen oberen Extremität	Other surgeries for congenital anomalies of the other upper extremities	11893	5-91	operationen: Operationen an Haut und Unterhaut: Andere Operationen an Haut und Unterhaut	Surgeries: Other skin and subcutaneous surgeries	equal	equal
4	T	oui	4	Z85.02	Inzision an der Mamma, mit Drainage	Incision on the breast with drainage	11645	5-881.1	operationen: Operationen an der Mamma: Andere Operationen an der Mamma: Inzision der Mamma: Drainage	surgeries: Breast surgeries: Other breast surgeries: Incision of the breast: Drainage	equal	equal
4	T	oui	4	Z85.24	Exzision von ektopischem Mammagewebe	Excision of ectopic breast tissue	11638	5-879.0	operationen: Operationen an der Mamma: Exzision und Resektion der Mamma: Andere Exzision und Resektion der Mamma: Exzision von ektopischem Mammagewebe	Surgeries: Breast surgeries: Excision and resection of the breast: Other excision and resection of the breast: Excision of ectopic mammary tissue	equal	equal
6	T	oui	6	Z85.2C.31	Débridement an der Mamma, ohne Exzision, in lokaler Infiltrationsanästhesie, Regional- oder Allgemeinanästhesie, kleinflächig	Debridement of the breast, without excision, under local infiltration anesthesia, regional or general anesthesia, limited area	11595	5-87...5-88	operationen: Operationen an der Mamma	Operations on the breast	equal	equal
6	T	oui	6	Z85.A6.12	Radikale Mastektomie mit Brustwandteilresektion	Radical mastectomy with chest wall resection	11612	5-874	operationen: Operationen an der Mamma: Exzision und Resektion der Mamma: Erweiterte (radikale) Mastektomie mit Resektion an den Musculi pectorales majores et minores und Thoraxwandteilresektion	Surgeries: Breast surgeries: Excision and resection of the breast: Extended (radical) mastectomy with resection of the pectoralis major and minor muscles and thoracic wall resection	equal	equal
3	T	oui	3	Z85.B	Mammareduktionsplastik	Breast reduction surgery	11673	5-884	operationen: Operationen an der Mamma: Andere Operationen an der Mamma: Mammareduktionsplastik	Surgeries: Breast surgeries: Other breast surgeries: Breast reduction surgery	equal	equal
4	T	oui	4	Z85.D2	Prothesenimplantation an der Mamma zur Augmentation	Breast augmentation with prosthesis implantation	11729	5-889.41	operationen: Operationen an der Mamma: Andere Operationen an der Mamma: Andere Operationen an der Mamma: Wechsel einer Mammaprothese: Mit gewebeverstärkendem Material	Surgeries: Breast surgeries: Other breast surgeries: Other breast surgeries: Breast implant replacement: With tissue-strengthening material	equal	equal
4	T	oui	4	Z85.H1	Autologe Vollhauttransplantation an die Mamma	Autologous full-thickness skin graft to the breast	11682	5-885.2	operationen: Operationen an der Mamma: Andere Operationen an der Mamma: Plastische Rekonstruktion der Mamma mit Haut- und Muskeltransplantation: Vollhauttransplantation	surgeries: Breast surgeries: Other breast surgeries: Plastic breast reconstruction with skin and muscle transplantation: Full-thickness skin graft	equal	equal
6	T	oui	6	Z85.J4.11	Weichteildeckung und Hautersatz an der Mamma mittels kultivierten Keratinozyten mit Applikation als Blatt	Soft tissue coverage and skin grafting of the breast using cultured keratinocytes with application as a sheet	11944	5-916.3	operationen: Operationen an Haut und Unterhaut: Andere Operationen an Haut und Unterhaut: Temporäre Weichteildeckung: Durch kultivierte Keratinozyten, kleinflächig	operations: Operations on skin and subcutaneous tissue: Other operations on skin and subcutaneous tissue: Temporary soft tissue coverage: By cultured keratinocytes, small area	equal	equal
6	T	oui	6	Z85.K4.11	Mammaplastik mit Deep inferior epigastric perforator flap [DIEP]	Breast augmentation with deep inferior epigastric perforator flap (DIEP)	11730	5-889.5	operationen: Operationen an der Mamma: Andere Operationen an der Mamma: Andere Operationen an der Mamma: Implantation eines Hautexpanders	Surgeries: Breast surgeries: Other breast surgeries: Other breast surgeries: Implantation of a skin expander	equal	equal
6	T	oui	6	Z86.0B.21	Entfernen eines Medikamententrägers an Haut und Subkutangewebe	Removal of a medication carrier from skin and subcutaneous tissue	11751	5-892.4	operationen: Operationen an Haut und Unterhaut: Operationen an Haut und Unterhaut: Andere Inzision an Haut und Unterhaut: Entfernung eines Medikamententrägers	operations: Operations on skin and subcutaneous tissue: Operations on skin and subcutaneous tissue: Other incision on skin and subcutaneous tissue: Removal of a drug carrier	equal	equal
6	T	oui	6	Z86.2B.46	Débridement in lokaler Infiltrationsanästhesie, Regional- oder Allgemeinanästhesie, grossflächig, an der Hand	Debridement under local infiltration anesthesia, regional or general anesthesia, extensive, on the hand	11170	5-840.4	operationen: Operationen an den Bewegungsorganen: Operationen an der Hand: Operationen an Sehnen der Hand: Debridement	Surgeries: Surgeries on the musculoskeletal system: Hand surgeries: Tendon surgeries of the hand: Debridement	equal	equal
6	T	oui	6	Z86.2C.46	Destruktion von Läsion oder Gewebe an Haut und Subkutangewebe, durch Infrarotkoagulation und Kryotherapie, grossflächig, an der Hand	Destruction of lesion or tissue in skin and subcutaneous tissue, by infrared coagulation and cryotherapy, large area, on the hand	11935	5-915.7	operationen: Operationen an Haut und Unterhaut: Andere Operationen an Haut und Unterhaut: Destruktion von erkranktem Gewebe an Haut und Unterhaut: Infrarotkoagulation, großflächig	operations: Operations on skin and subcutaneous tissue: Other operations on skin and subcutaneous tissue: Destruction of diseased tissue in skin and subcutaneous tissue: Infrared coagulation, large area	equal	equal
6	T	oui	6	Z86.42.15	Radikale und grossflächige Exzision von Läsion oder Gewebe an Haut und Subkutangewebe, mit primärem Wundverschluss, an Unterarm	Radical and extensive excision of lesion or tissue in skin and subcutaneous tissue, with primary wound closure, on forearm	11764	5-895.2	operationen: Operationen an Haut und Unterhaut: Operationen an Haut und Unterhaut: Radikale und ausgedehnte Exzision von erkranktem Gewebe an Haut und Unterhaut: Mit primärem Wundverschluss	Operations on skin and subcutaneous tissue: Radical and extensive excision of diseased tissue in the skin and subcutaneous tissue: with primary wound closure	equal	equal
6	T	oui	6	Z86.53.1D	Sekundärnaht an Haut und Subkutangewebe des Fusses	Secondary suture of skin and subcutaneous tissue of the foot	11804	5-900.1	operationen: Operationen an Haut und Unterhaut: Operative Wiederherstellung und Rekonstruktion von Haut und Unterhaut: Einfache Wiederherstellung der Oberflächenkontinuität an Haut und Unterhaut: Sekundärnaht	operations: Operations on skin and subcutaneous tissue: Surgical restoration and reconstruction of skin and subcutaneous tissue: Simple restoration of surface continuity of skin and subcutaneous tissue: Secondary suture	equal	equal
6	T	oui	6	Z86.6A.14	Autologe Vollhauttransplantation, kleinflächig, an Oberarm und Ellenbogen	Autologous full-thickness skin graft, small area, to upper arm and elbow	11816	5-902.2	operationen: Operationen an Haut und Unterhaut: Operative Wiederherstellung und Rekonstruktion von Haut und Unterhaut: Freie Hauttransplantation, Empfängerstelle: Vollhaut, kleinflächig	Operations on skin and subcutaneous tissue: Surgical restoration and reconstruction of skin and subcutaneous tissue: Free skin graft, recipient site: full-thickness, small area	equal	equal
6	T	oui	6	Z86.6C.16	Permanenter Hautersatz durch zweischichtiges Dermis-Epidermis-Ersatzmaterial, kleinflächig, an der Hand	Permanent skin grafting with a two-layered dermal-epidermal substitute material, small area, on the hand	11826	5-902.d	operationen: Operationen an Haut und Unterhaut: Operative Wiederherstellung und Rekonstruktion von Haut und Unterhaut: Freie Hauttransplantation, Empfängerstelle: Permanenter Hautersatz durch Dermisersatzmaterial, kleinflächig	operations: Operations on skin and subcutaneous tissue: Surgical restoration and reconstruction of skin and subcutaneous tissue: Free skin graft, recipient site: Permanent skin replacement by dermal substitute material, small area	equal	equal
6	T	oui	6	Z86.7A.6E	Transpositionsplastik (VY), grossflächig, an anderer Lokalisation	Transpositional flap, large area, at another location	11844	5-903.7	operationen: Operationen an Haut und Unterhaut: Operative Wiederherstellung und Rekonstruktion von Haut und Unterhaut: Lokale Lappenplastik an Haut und Unterhaut: Transpositionsplastik, großflächig	operations: Operations on skin and subcutaneous tissue: Surgical restoration and reconstruction of skin and subcutaneous tissue: Local flap surgery on skin and subcutaneous tissue: Transpositional flap surgery, large-area	equal	wider
6	T	oui	6	Z86.7A.CD	W-Plastik, kleinflächig, am Fuss	W-plasty, small area, on the foot	11847	5-903.a	operationen: Operationen an Haut und Unterhaut: Operative Wiederherstellung und Rekonstruktion von Haut und Unterhaut: Lokale Lappenplastik an Haut und Unterhaut: W-Plastik, kleinflächig	operations: Operations on skin and subcutaneous tissue: Operative restoration and reconstruction of skin and subcutaneous tissue: Local flap surgery on skin and subcutaneous tissue: W-plasty, small area	equal	equal
6	T	oui	6	Z86.83.1A	Gewebereduktionsplastik am Bauch	Tissue reduction surgery on the abdomen	7740	5-542	operationen: Operationen am Verdauungstrakt: Andere Operationen in der Bauchregion: Exzision und Destruktion von erkranktem Gewebe der Bauchwand	Procedures: Procedures on the digestive tract: Other procedures in the abdominal region: Excision and destruction of diseased tissue of the abdominal wall	equal	equal
6	T	oui	6	Z86.84.09	Korrektur einer Narbenkontraktur oder Bride, sonstige	Correction of a scar contracture or bride, other	11871	5-907.0	operationen: Operationen an Haut und Unterhaut: Operative Wiederherstellung und Rekonstruktion von Haut und Unterhaut: Revision einer Hautplastik: Narbenkorrektur (nach Hautplastik)	operations: Operations on skin and subcutaneous tissue: Surgical restoration and reconstruction of skin and subcutaneous tissue: Revision of a skin graft: Scar revision (after skin grafting)	equal	equal
6	T	oui	6	Z86.88.H1	Temporäre Weichteildeckung mittels xenogener Haut, grossflächig, am Kopf	Temporary soft tissue coverage using xeno skin, large area, on the head	11947	5-916.6	operationen: Operationen an Haut und Unterhaut: Andere Operationen an Haut und Unterhaut: Temporäre Weichteildeckung: Durch xenogenes Hautersatzmaterial, großflächig	operations: Operations on skin and subcutaneous tissue: Other operations on skin and subcutaneous tissue: Temporary soft tissue coverage: Using xenogeneic skin substitute material, large area	equal	equal
6	T	oui	6	Z86.8A.51	Weichteildeckung und Hautersatz mittels Applikation von Zellsuspension (Sprühtherapie) von nicht kultivierten Keratinozyten und Fibroblasten, kleinflächig, am Kopf	Soft tissue coverage and skin grafting using application of a cell suspension (spray therapy) of non-cultured keratinocytes and fibroblasts, small area, on the head	11944	5-916.3	operationen: Operationen an Haut und Unterhaut: Andere Operationen an Haut und Unterhaut: Temporäre Weichteildeckung: Durch kultivierte Keratinozyten, kleinflächig	operations: Operations on skin and subcutaneous tissue: Other operations on skin and subcutaneous tissue: Temporary soft tissue coverage: By cultured keratinocytes, small area	equal	equal
6	T	oui	6	Z86.93.26	Einsetzen eines Gewebeexpanders an der Hand	Insertion of a tissue expander in the hand	11887	5-909.0	operationen: Operationen an Haut und Unterhaut: Operative Wiederherstellung und Rekonstruktion von Haut und Unterhaut: Andere Wiederherstellung und Rekonstruktion von Haut und Unterhaut: Implantation eines Hautexpanders	operations: Operations on skin and subcutaneous tissue: Surgical restoration and reconstruction of skin and subcutaneous tissue: Other restoration and reconstruction of skin and subcutaneous tissue: Implantation of a skin expander	equal	equal
6	T	oui	6	Z86.A1.11	Abtragen einer Hautblase bei Verbrennungen und Verätzungen	Debridement of skin blisters in burns and chemical injuries	12007	5-921.0	operationen: Operationen an Haut und Unterhaut: Operationen an Haut und Unterhaut bei Verbrennungen und Verätzungen: Chirurgische Wundtoilette [Wunddebridement] und Entfernung von erkranktem Gewebe an Haut und Unterhaut bei Verbrennungen und Verätzungen: Abtragen einer Hautblase	operations: Operations on skin and subcutaneous tissue: Operations on skin and subcutaneous tissue in case of burns and scalds: Surgical wound care [wound debridement] and removal of diseased tissue from skin and subcutaneous tissue in case of burns and scalds: Excision of a skin blister	equal	equivalent
6	T	oui	6	Z86.B1.31	Onychoplastik	Nail reconstruction	11796	5-898.9	operationen: Operationen an Haut und Unterhaut: Operationen an Haut und Unterhaut: Operationen am Nagelorgan: Nagelplastik	Surgeries: Skin and subcutaneous tissue surgeries: Skin and subcutaneous tissue surgeries: Nail organ surgeries: Nail reconstruction	equal	equal
4	T	oui	4	Z87.07	Kontrast-Laryngographie	Contrast laryngography	1489	3-134	bildgebende diagnostik: Projektionsradiographie: Projektionsradiographie mit Kontrastmittelverfahren: Pharyngographie	imaging studies: projection radiography: contrast-enhanced projection radiography: pharyngography	equal	equal
4	T	oui	4	Z87.34	Intrathorakale Lymphangiographie	Intra-thoracic lymphangiography	1607	3-62	bildgebende diagnostik: Darstellung des Gefäßsystems: Lymphographie	Imaging diagnostics: Representation of the vascular system: Lymphangiography	equal	equal
4	T	oui	4	Z87.51	Perkutane transhepatische Cholangiographie	Percutaneous Transhepatic Cholangiography	7384	5-514.u	operationen: Operationen am Verdauungstrakt: Operationen an Gallenblase und Gallenwegen: Andere Operationen an den Gallengängen: Therapeutische perkutan-transhepatische Endoskopie der Gallenwege	Procedures: Procedures on the digestive tract: Operations on the gallbladder and bile ducts: Other operations on the biliary system: Therapeutic percutaneous transhepatic cholangiography	equal	equal
4	T	oui	4	Z87.74	Retrograde Pyelographie	Retrograde pyelography	1504	3-13d.5	bildgebende diagnostik: Projektionsradiographie: Projektionsradiographie mit Kontrastmittelverfahren: Urographie: Retrograd	imaging studies: projection radiography: projection radiography with contrast procedures: urography: retrograde	equal	equal
4	T	oui	4	Z88.27	Skelettröntgen von Oberschenkel, Knie und Unterschenkel	Skeletal X-ray of femur, knee, and tibia	548	1-481.6	diagnostische massnahmen: Biopsie ohne Inzision: Biopsie ohne Inzision an Knochen und Gelenken: Biopsie ohne Inzision an Knochen mit Steuerung durch bildgebende Verfahren: Femur und Patella	Diagnostic measures: * Needle biopsy: Needle biopsy of bone and joints: * Image-guided needle biopsy of bone: Femur and patella.	equal	equal
6	T	oui	6	Z88.48.00	Arteriographie der A. femoralis und anderer Arterien der unteren Extremitäten, n.n.bez.	Femoral artery and other lower extremity arteries angiography, as needed.	1584	3-607	bildgebende diagnostik: Darstellung des Gefäßsystems: Arteriographie: Arteriographie der Gefäße der unteren Extremitäten	Imaging studies: Vascular depiction: Angiography: Lower extremity arterial angiography	equal	equivalent
6	T	oui	6	Z88.71.14	Duplex-Sonographie der supraaortalen extrakraniellen Arterien und Venen	Duplex ultrasound of the supraaortic extracranial arteries and veins	1468	3-05e.3	bildgebende diagnostik: Ultraschalluntersuchungen: Endosonographie: Intravaskuläre Endosonographie der Blutgefäße: Vena cava	imaging studies: ultrasound examinations: endosonography: intravascular endosonography of blood vessels: vena cava	equal	equal
6	T	oui	6	Z88.72.23	Echokardiographie, transösophageal, unter medikamentöser Belastung	Transesophageal echocardiography under pharmacological stress	1536	3-224.2	bildgebende diagnostik: Computertomographie [Computertomographie]: Computertomographie [Computertomographie] mit Kontrastmittel: Computertomographie des Herzens mit Kontrastmittel: Unter pharmakologischer Belastung	Imaging studies: Computed tomography [CT]: CT [CT] with contrast agent: Cardiac CT with contrast agent: Under pharmacological stress	equal	equal
6	T	oui	6	Z88.74.41	Diagnostischer Ultraschall des Verdauungstrakts, starre Endosonographie, mit Punktion	Diagnostic ultrasound of the gastrointestinal tract, rigid endosonography, with biopsy	1447	3-053	bildgebende diagnostik: Ultraschalluntersuchungen: Endosonographie: Endosonographie des Magens	imaging studies: ultrasound examinations: endosonography: gastric endosonography	equal	inexact
6	T	oui	6	Z88.91.10	Kernspintomographie von Gehirn und Hirnstamm	Brain and brainstem MRI	1763	3-802	bildgebende diagnostik: Magnetresonanztomographie [Magnetresonanztomographie]: Magnetresonanztomographie [Magnetresonanztomographie], nativ: Native Magnetresonanztomographie von Wirbelsäule und Rückenmark	imaging studies: magnetic resonance imaging [MRI]: native MRI of spine and spinal cord	equal	equal
6	T	oui	6	Z88.97.12	Ganzkörper-MRI	Whole-body MRI	1759	3-80...3-84	bildgebende diagnostik: Magnetresonanztomographie [Magnetresonanztomographie]	imaging: magnetic resonance imaging [MRI]	equal	equal
6	T	oui	6	Z89.07.60	Untersuchung eines Lebendspenders wegen Organentnahme, n.n.bez.	Examination of a living donor for organ donation, unspecified.	7	1-202.0	diagnostische massnahmen: Untersuchung einzelner Körpersysteme: Neurologische Untersuchungen: Diagnostik zur Feststellung des irreversiblen Hirnfunktionsausfalls: Bei einem potenziellen Organspender	Diagnostic measures: Examination of individual organ systems: Neurological examinations: Diagnostics to determine irreversible brain dysfunction: In a potential organ donor	equal	equal
6	T	oui	6	Z89.17.10	Polysomnographie	Polysomnography	1155	1-790	diagnostische massnahmen: Funktionstests: Physiologische Funktionstests: Polysomnographie	diagnostic measures: Functional tests: Physiological functional tests: polysomnography	equal	equal
6	T	oui	6	Z89.19.12	Nicht-invasive Video-EEG-Intensivdiagnostik, Aufzeichnungsdauer von mehr als 24 Stunden bis 48 Stunden	Non-invasive video-EEG intensive monitoring, recording duration of more than 24 hours up to 48 hours	17981	8-920	nicht operative therapeutische massnahmen: Patientenmonitoring: Neurologisches Monitoring: Elektroenzephalographie-Monitoring (mindestens 2 Kanäle) für mehr als 24 h	Non-operative therapeutic measures: Patient monitoring: Neurological monitoring: Electroencephalogram (EEG) monitoring (at least 2 channels) for more than 24 hours.	equal	equivalent
4	T	oui	4	Z89.23	Elektromyographie des Urethralsphinkters	Electromyography of the urethral sphincter	221	1-335	diagnostische massnahmen: Untersuchung einzelner Körpersysteme: Untersuchung des Harntraktes: Messung des Urethradruckprofils	Diagnostic measures: Examination of individual body systems: Examination of the urinary tract: Measurement of the urethral pressure profile	equal	equal
6	T	oui	6	Z92.05.12	Myokardperfusionsszintigraphie mit physikalischer Belastung	Myocardial perfusion scintigraphy with physical stress	1627	3-704.1	bildgebende diagnostik: Nuklearmedizinische diagnostische Verfahren: Szintigraphie: Radionuklidventrikulographie des Herzens: Radionuklidventrikulographie unter physischer Belastung	imaging studies: Nuclear medicine diagnostic procedures: Scintigraphy: Cardiac radionuclide ventriculography: Cardiac radionuclide ventriculography under physical stress	equal	equal
6	T	oui	6	Z92.18.03	Ganzkörperszintigraphie zur Lokalisationsdiagnostik, Ganzkörperszintigraphie mit Radiojod, ohne Gabe von rekombinantem Thyreotropin [rh-TSH]	Whole-body scintigraphy for localization diagnostics, whole-body scintigraphy with radioiodine, without administration of recombinant thyroid-stimulating hormone [rh-TSH]	1673	3-70c.00	bildgebende diagnostik: Nuklearmedizinische diagnostische Verfahren: Szintigraphie: Ganzkörper-Szintigraphie zur Lokalisationsdiagnostik: Ganzkörper-Szintigraphie mit Radiojod: Ohne Gabe von rekombinantem Thyreotropin [Rekombinantes Thyreotropin]	imaging diagnostics: Nuclear medicine diagnostic procedures: Scintigraphy: Whole-body scintigraphy for localization diagnosis: Whole-body scintigraphy with radioactive iodine: Without administration of recombinant thyrotropin [Recombinant thyrotropin]	equal	equal
6	T	oui	6	Z92.21.01	Oberflächenstrahlentherapie, bis zu 2 Bestrahlungsfelder	Surface radiation therapy, up to 2 radiation fields	15367	8-520.0	nicht operative therapeutische massnahmen: Strahlentherapie, nuklearmedizinische Therapie und Chemotherapie: Strahlentherapie: Oberflächenstrahlentherapie: Bis zu 2 Bestrahlungsfelder	Non-operative therapeutic measures: radiotherapy, nuclear medicine therapy and chemotherapy: Radiotherapy: Surface radiotherapy: Up to 2 irradiation fields	equal	equal
6	T	oui	6	Z92.25.22	Teleradiotherapie mit Elektronen, Linearbeschleuniger, ohne bildgestützte Einstellung, mehr als 2 Bestrahlungsfelder	Teletherapy with electrons, linear accelerator, without image-guided setup, more than 2 radiation fields	15388	8-522.a0	nicht operative therapeutische massnahmen: Strahlentherapie, nuklearmedizinische Therapie und Chemotherapie: Strahlentherapie: Hochvoltstrahlentherapie: Linearbeschleuniger bis zu 6 Megaelektronenvolt Photonen oder schnelle Elektronen, mehr als 2 Bestrahlungsfelder: Ohne bildgestützte Einstellung	Non-operative therapeutic measures: radiotherapy, nuclear medicine therapy and chemotherapy: Radiotherapy: High-voltage radiotherapy: Linear accelerator up to 6 megaelectronvolts photons or fast electrons, more than 2 irradiation fields: Without image-guided setting	equal	equal
6	T	oui	6	Z92.27.22	Implantation oder Einsetzen radioaktiver Elemente (Brachytherapie mit umschlossenen Radionukliden), intrakavitär	Implantation or insertion of radioactive elements, intracavitary	15432	8-524.4	nicht operative therapeutische massnahmen: Strahlentherapie, nuklearmedizinische Therapie und Chemotherapie: Strahlentherapie: Brachytherapie mit umschlossenen Radionukliden: Intrakavitär	Non-operative therapeutic measures: radiotherapy, nuclear medicine therapy and chemotherapy: Radiotherapy: Brachytherapy with encapsulated radionuclides: Intracavitary	equal	wider
6	T	oui	6	Z92.28.44	Radiojodtherapie über 1,2 bis unter 5 GBq I-131, mit Gabe von rekombinantem Thyreotropin [rh-TSH]	Radioiodine therapy with 1.2 to less than 5 GBq I-131, administered with recombinant human thyroid-stimulating hormone (rh-TSH)	15552	8-531.11	nicht operative therapeutische massnahmen: Strahlentherapie, nuklearmedizinische Therapie und Chemotherapie: Nuklearmedizinische Therapie: Radiojodtherapie: Radiojodtherapie über 1,2 bis unter 5 Gigabecquerel I-131: Mit Gabe von rekombinantem Thyreotropin (rh-TSH)	Non-operative therapeutic measures: radiotherapy, nuclear medicine therapy and chemotherapy: Nuclear medicine therapy: Radioactive iodine therapy: Radioactive iodine therapy with a dose of 1.2 to less than 5 Gigabecquerel I-131: With administration of recombinant thyroid-stimulating hormone (rh-TSH)	equal	equal
6	T	oui	6	Z92.29.24	Brachytherapie mit Implantation von entfernbaren Strahlern in mehreren Ebenen, hohe Dosisleistung, intraoperativ	Brachytherapy with implantation of removable applicators in multiple planes, high dose rate, intraoperative	15443	8-525.02	nicht operative therapeutische massnahmen: Strahlentherapie, nuklearmedizinische Therapie und Chemotherapie: Strahlentherapie: Sonstige Brachytherapie mit umschlossenen Radionukliden: Interstitielle Brachytherapie mit Implantation von entfernbaren Strahlern in einer Ebene: Hohe Dosisleistung	Non-operative therapeutic measures: radiotherapy, nuclear medicine therapy and chemotherapy: Radiotherapy: Other brachytherapy with encapsulated radionuclides:Interstitial brachytherapy with implantation of removable applicators in one plane: High dose rate	equal	equal
6	T	oui	6	Z92.30.99	Stereotaktische Bestrahlung, einzeitig, sonstige	Stereotactic radiotherapy, single fraction, other	15402	8-523.0	nicht operative therapeutische massnahmen: Strahlentherapie, nuklearmedizinische Therapie und Chemotherapie: Strahlentherapie: Andere Hochvoltstrahlentherapie: Stereotaktische Bestrahlung, einzeitig	Non-operative therapeutic measures: radiotherapy, nuclear medicine therapy and chemotherapy: Radiotherapy: Other high-voltage radiation therapy: Stereotactic irradiation, single-fraction	equal	equal
4	T	oui	4	Z93.56	Applikation eines Druckverbands	Application of a pressure bandage	15146	8-19...8-19	nicht operative therapeutische massnahmen: Verbände	Non-operative therapeutic measures: Bandages	equal	equal
4	T	oui	4	Z93.83	Ergotherapie	Occupational therapy	15666	8-559	nicht operative therapeutische massnahmen: Frührehabilitative und physikalische Therapie: Frührehabilitative Komplexbehandlung: Fachübergreifende und andere Frührehabilitation	Non-operative therapeutic measures: Early rehabilitation and physical therapy: Early rehabilitative complex treatment: Interdisciplinary and other early rehabilitation	equal	equal
6	T	oui	6	Z93.9F.12	Atmungsunterstützung durch Anwendung von High-flow-Nasenkanülen [HFNC-System] bei Neugeborenen und Säuglingen	Respiratory support using high-flow nasal cannulae [HFNC system] in newborns and infants	15800	8-711.4	nicht operative therapeutische massnahmen: Maßnahmen für das Atmungssystem: Maschinelle Beatmung und Atemunterstützung über Maske oder Tubus und Beatmungsentwöhnung: Maschinelle Beatmung und Atemunterstützung bei Neugeborenen und Säuglingen: Atemunterstützung durch Anwendung von High-Flow-Nasenkanülen [High flow nasal cannula-System]	Non-operative therapeutic measures: Measures for the respiratory system: Mechanical ventilation and respiratory support via mask or tube and weaning from mechanical ventilation: Mechanical ventilation and respiratory support in newborns and infants: Respiratory support by applying high-flow nasal cannulae [high flow nasal cannula system]	equal	equal
4	T	oui	4	Z95.05	Untersuchung des Gesichtfeldes	Examination of the visual field	86	1-22	diagnostische massnahmen: Untersuchung einzelner Körpersysteme: Untersuchungen der Augen	Diagnostic measures: Examination of individual body systems: Eye examinations	equal	equal
4	T	oui	4	Z95.13	Ultraschalluntersuchung des Auges	Ophthalmic ultrasound examination	1433	3-03...3-05	bildgebende diagnostik: Ultraschalluntersuchungen	imaging studies: ultrasound examinations	equal	equal
4	T	oui	4	Z96.29	Reposition einer Invagination im Verdauungstrakt	Repositioning of an intussusception in the gastrointestinal tract	6617	5-447.6	operationen: Operationen am Verdauungstrakt: Andere Operationen am Magen: Revision nach Magenresektion: Umwandlung mit Dünndarminterposition	Procedures: Procedures on the digestive tract: Other procedures on the stomach: Revision after gastric resection: Conversion with jejunal interposition	equal	equal
4	T	oui	4	Z97.04	Ersetzen von Sonde oder Enterostomievorrichtung im Dickdarm	Replacement of colon tube or colostomy device	7188	5-496.a2	operationen: Operationen am Verdauungstrakt: Operationen am Anus: Rekonstruktion des Anus und des Sphinkterapparates: Wechsel eines künstlichen Analsphinkters und seiner Komponenten: Ballon	Procedures: Procedures on the digestive tract: Procedures on the anus: Reconstruction of the anus and sphincter apparatus: Replacement of an artificial anal sphincter and its components: Balloon	equal	equivalent
4	T	oui	4	Z98.14	Entfernen eines intraluminalen Fremdkörpers vom Larynx ohne Inzision	Removal of an intraluminal foreign body from the larynx without incision	14839	8-101.5	nicht operative therapeutische massnahmen: Entfernung von Fremdmaterial und Konkrementen: Fremdkörperentfernung: Fremdkörperentfernung ohne Inzision: Aus dem Pharynx	Non-operative therapeutic measures: Removal of foreign material and concretions: Foreign body removal: Foreign body removal without incision: From the pharynx	equal	equal
4	T	oui	4	Z98.51	Extrakorporelle Stosswellen-Lithotripsie [ESWL] von Niere, Ureter und/oder Blase	Extracorporeal shock wave lithotripsy (ESWL) of kidney, ureter and/or bladder	14866	8-110.2	nicht operative therapeutische massnahmen: Entfernung von Fremdmaterial und Konkrementen: Extrakorporale Stoßwellentherapie: Extrakorporale Stoßwellenlithotripsie [Extrakorporale Stoßwellenlithotripsie] von Steinen in den Harnorganen: Niere	Non-operative therapeutic measures: Removal of foreign material and concrements: Extracorporeal shock wave therapy: Extracorporeal shock wave lithotripsy [Extracorporeal shock wave lithotripsy] of stones in the urinary organs: Kidney	equal	equal
6	T	oui	6	Z99.04.21	Transfusion von bestrahlten Erythrozytenkonzentraten, 1 TE bis 5 TE	Transfusion of irradiated erythrocyte concentrates, 1 unit to 5 units	15910	8-800.c0	nicht operative therapeutische massnahmen: Maßnahmen für den Blutkreislauf: Transfusion von Blutzellen: Transfusion von Vollblut, Erythrozytenkonzentrat und Thrombozytenkonzentrat: Erythrozytenkonzentrat: 1 TE bis unter 6 TE	Non-operative therapeutic measures: Measures for the circulatory system: Blood cell transfusion: Transfusion of whole blood, erythrocyte concentrate and platelet concentrate: Erythrocyte concentrate: 1 unit up to 6 units	equal	equal
6	T	oui	6	Z99.05.6Q	Transfusion von patientenbezogenen Thrombozytenkonzentraten, 63 bis 65 Konzentrate	Transfusion of patient-specific platelet concentrates, 63 to 65 concentrates	15900	8-800.6n	nicht operative therapeutische massnahmen: Maßnahmen für den Blutkreislauf: Transfusion von Blutzellen: Transfusion von Vollblut, Erythrozytenkonzentrat und Thrombozytenkonzentrat: Patientenbezogene Thrombozytenkonzentrate: 59 bis unter 63 patientenbezogene Thrombozytenkonzentrate	Non-operative therapeutic measures: Measures for the circulatory system: Blood cell transfusion: Transfusion of whole blood, erythrocyte concentrate and platelet concentrate: Patient-specific platelet concentrates: 59 to less than 63 patient-specific platelet concentrates	equal	equal
4	T	oui	4	Z99.08	Transfusion von Blutexpander	Transfusion of blood expander	15928	8-800.cj	nicht operative therapeutische massnahmen: Maßnahmen für den Blutkreislauf: Transfusion von Blutzellen: Transfusion von Vollblut, Erythrozytenkonzentrat und Thrombozytenkonzentrat: Erythrozytenkonzentrat: 184 TE bis unter 200 TE	Non-operative therapeutic measures: Measures for the circulatory system: Blood cell transfusion: Transfusion of whole blood, erythrocyte concentrate and platelet concentrate: Erythrocyte concentrate: 184 ml to less than 200 ml	equal	equal
6	T	oui	6	Z99.25.21	Hypertherme intraperitoneale Chemotherapie [HIPEC]	Hyperthermic Intraperitoneal Chemotherapy	15624	8-546.0	nicht operative therapeutische massnahmen: Strahlentherapie, nuklearmedizinische Therapie und Chemotherapie: Zytostatische Chemotherapie, Immuntherapie und antiretrovirale Therapie: Hypertherme Chemotherapie: Hypertherme intraperitoneale Chemotherapie [Hypertherme intraperitoneale Chemotherapie]	Non-operative therapeutic measures: radiotherapy, nuclear medicine therapy and chemotherapy: Cytostatic chemotherapy, immunotherapy and antiretroviral therapy: Hyperthermic chemotherapy: Hyperthermic intraperitoneal chemotherapy [Hyperthermic intraperitoneal chemotherapy]	equal	equal
6	T	oui	6	Z99.25.31	Chemoembolisation	Chemoembolization	17319	8-83b.10	nicht operative therapeutische massnahmen: Maßnahmen für den Blutkreislauf: Therapeutische Katheterisierung und Kanüleneinlage in Gefäße: Zusatzinformationen zu Materialien: Art der Partikel zur selektiven Embolisation: Medikamentenbeladene Partikel	Non-operative therapeutic measures: Measures for the circulatory system: Therapeutic catheterization and cannulation of vessels: Additional information on materials: Type of particles for selective embolization: Drug-eluting particles	equal	equal
4	T	oui	4	Z99.44	Tollwutimpfung	Rabies vaccination	14801	8-03...8-03	nicht operative therapeutische massnahmen: Immuntherapie	Non-operative therapeutic measures: immunotherapy	equal	equal
6	T	oui	6	Z99.71.12	Therapeutische Plasmapherese, Plasmaaustausch mit NaCl und Kolloiden (z. B. Albumin)	Therapeutic plasma exchange, plasma exchange with NaCl and colloids	16781	8-820	nicht operative therapeutische massnahmen: Maßnahmen für den Blutkreislauf: Plasmapherese, Immunadsorption und verwandte Verfahren: Therapeutische Plasmapherese	Non-operative therapeutic measures: Measures for the circulatory system: Plasmapheresis, immunoadsorption and related procedures: Therapeutic plasmapheresis	equal	equal
6	T	oui	6	Z99.72.21	Lymphapherese zur Transplantation	Lymphatic exchange for transplantation	6255	5-408.6	operationen: Operationen am hämatopoetischen und Lymphgefäßsystem: Operationen am Lymphgewebe: Andere Operationen am Lymphgefäßsystem: Transplantation oder Transposition von Lymphgefäßen	operations: Operations on the hematopoietic and lymphatic system: Operations on lymph tissue: Other operations on the lymphatic system: Transplantation or transposition of lymphatic vessels	equal	inexact
6	T	oui	6	Z99.81.20	Systemische Hypothermie	Systemic hypothermia	17629	8-851.41	nicht operative therapeutische massnahmen: Maßnahmen für den Blutkreislauf: Extrakorporale Zirkulation und Behandlung von Blut: Operativer äußerer Kreislauf (bei Anwendung der Herz-Lungen-Maschine): Mit tiefer Hypothermie (20 bis unter 26 °C): Mit intraaortaler Ballonokklusion	Non-operative therapeutic measures: Measures for the circulatory system: Extracorporeal circulation and blood treatment: Surgical external circulation (using a heart-lung machine): With deep hypothermia (20 to below 26°C): With intra-aortic balloon occlusion.	equal	equal
6	T	oui	6	Z99.84.36	Aerosolisolierung, mindestens 7 bis 13 Behandlungstage	Aerosol isolation, at least 7 to 13 treatment days	18334	8-98g.01	nicht operative therapeutische massnahmen: Komplexbehandlung: Sonstige multimodale Komplexbehandlung: Komplexbehandlung bei Besiedelung oder Infektion mit nicht multiresistenten isolationspflichtigen Erregern: Komplexbehandlung auf spezieller Isoliereinheit: Mindestens 5 bis höchstens 9 Behandlungstage	Non-operative therapeutic measures: Complex treatment: Other multimodal complex treatment: Complex treatment in case of colonization or infection with non-multiresistant, isolation-required pathogens: Complex treatment on a specialized isolation unit: At least 5 to a maximum of 9 treatment days.	equal	equal
6	T	oui	6	Z00.66.36	Perkutan-transluminale Gefässintervention an den Koronarien mittels Thrombektomie	Percutaneous transluminal coronary angioplasty with thrombectomy	17160	8-837.t	nicht operative therapeutische massnahmen: Maßnahmen für den Blutkreislauf: Therapeutische Katheterisierung und Kanüleneinlage in Gefäße: Perkutan-transluminale Gefäßintervention an Herz und Koronargefäßen: Thrombektomie aus Koronargefäßen	Non-operative therapeutic measures: Measures for the circulatory system: Therapeutic catheterization and cannulation of vessels: Percutaneous transluminal intervention of heart and coronary arteries: Coronary artery thrombectomy	equivalent	equal
4	T	oui	4	Z08.35	Behebung einer Blepharoptose durch Tarsoplastik	Correction of blepharoptosis by tarsopexy	3009	5-094.0	operationen: Operationen an den Augen: Operationen an den Augenlidern: Korrekturoperation bei Blepharoptosis: Tarsusresektion	operations: Eye surgeries: Eyelid surgeries: Corrective surgery for blepharoptosis: Tarsal resection	equivalent	inexact
6	T	oui	6	Z10.5X.10	Lösung von Adhäsionen an Konjunktiva und Augenlid mit Bindehautplastik	Adhesion lysis of conjunctiva and eyelid with conjunctival flap surgery	3183	5-114.1	operationen: Operationen an den Augen: Operationen an der Konjunktiva: Lösung von Adhäsionen zwischen Konjunktiva und Augenlid: Mit Bindehautplastik	Procedures: Eye surgeries: Conjunctiva surgeries: Adhesion lysis between conjunctiva and eyelid: With conjunctival flap	equivalent	equal
6	T	oui	6	Z21.4X.22	Resektion der Nase, subtotal	Partial resection of the nose	3885	5-213.0	operationen: Operationen an Nase und Nasennebenhöhlen: Operationen an der Nase: Resektion der Nase: Partiell	Surgeries: Surgeries on nose and paranasal sinuses: Nasal surgeries: Partial resection of the nose	equivalent	inexact
6	T	oui	6	Z21.88.14	Septumplastik, Plastische Rekonstruktion des Nasenseptums, mit lokalen autogenen Transplantaten (Austauschplastik)	Septoplasty, plastic reconstruction of the nasal septum, with local autogenous grafts	3953	5-218.40	operationen: Operationen an Nase und Nasennebenhöhlen: Operationen an der Nase: Plastische Rekonstruktion der inneren und äußeren Nase [Septorhinoplastik]: Komplexe plastische Rekonstruktion der inneren und äußeren Nase: Mit lokalen autogenen Transplantaten	Surgeries: Surgeries of the nose and paranasal sinuses: Nose surgeries: Plastic reconstruction of the inner and outer nose (septorhinoplasty): Complex plastic reconstruction of the inner and outer nose: With local autogenous grafts.	equivalent	equal
6	T	oui	6	Z22.41.11	Sinusotomie des Sinus frontalis, endonasal	Frontal sinus antrostomy, endonasal	4011	5-223.5	operationen: Operationen an Nase und Nasennebenhöhlen: Operationen an den Nasennebenhöhlen: Operationen an der Stirnhöhle: Endonasale Stirnhöhlenoperation	Surgeries: Surgeries on nose and paranasal sinuses: Paranasal sinus surgeries: Frontal sinus surgeries: Endoscopic frontal sinus surgery	equivalent	inexact
6	T	oui	6	Z37.27.11	Herz-Mapping mit Hilfe eines Multielektroden-Mapping-Katheters mit automatisierter Signalerfassung	Heart mapping using a multielectrode mapping catheter with automated signal acquisition	120	1-268	diagnostische massnahmen: Untersuchung einzelner Körpersysteme: Untersuchungen der elektrophysiologischen Aktivität des Herzens: Kardiales Mapping	Diagnostic measures: Examination of individual body systems: Examinations of the electrophysiological activity of the heart: Cardiac mapping	equivalent	equal
6	T	oui	6	Z39.75.11	Perkutan-transluminale Gefässintervention, sonstige Gefässe, Rotationsthrombektomie	Percutaneous transluminal angioplasty, other vessels, rotational thrombectomy	17077	8-836.p	nicht operative therapeutische massnahmen: Maßnahmen für den Blutkreislauf: Therapeutische Katheterisierung und Kanüleneinlage in Gefäße: (Perkutan-)transluminale Gefäßintervention: Rotationsthrombektomie	Non-operative therapeutic measures: Measures for the circulatory system: Therapeutic catheterization and cannulation of vessels: (Percutaneous)-transluminal vascular intervention: rotational thrombectomy	equivalent	equal
6	T	oui	6	Z39.79.75	Kathetertechnischer Verschluss mittels Laser, an Gefässen der unteren Extremitäten	Laser closure of catheter access sites in lower extremity vessels	5766	5-38...5-39	operationen: Operationen an den Blutgefäßen	Procedures on blood vessels	equivalent	equal
6	T	oui	6	Z39.91.99	Freilegung eines Gefässes, sonstige	Exposure of a vessel, other	5766	5-38...5-39	operationen: Operationen an den Blutgefäßen	Procedures on blood vessels	equivalent	equal
6	T	oui	6	Z39.95.E1	Hämodiafiltration: Kontinuierlich, arteriovenös [CAVHDF], bis 24 Stunden	Hemofiltration: Continuous, arteriovenous [CAVHDF], up to 24 hours	17770	8-855.13	nicht operative therapeutische massnahmen: Maßnahmen für den Blutkreislauf: Extrakorporale Zirkulation und Behandlung von Blut: Hämodiafiltration: Kontinuierlich, arteriovenös (CAVHDF): Bis 24 Stunden	Non-operative therapeutic measures: Measures for the circulatory system: Extracorporeal circulation and blood treatment: Hemofiltration: Continuous, arteriovenous (CAVHDF): Up to 24 hours	equivalent	inexact
6	T	oui	6	Z44.95.31	Schlauchmagen-Gastroplastik, endoskopisch	Endoscopic gastric sleeve gastrectomy	6546	5-434.50	operationen: Operationen am Verdauungstrakt: Inzision, Exzision und Resektion am Magen: Atypische partielle Magenresektion: Herstellung eines Schlauchmagens [Sleeve Resection]: Offen chirurgisch	Procedures: Gastrointestinal surgeries: Incision, excision and resection of the stomach: Atypical partial gastric resection: Creation of a sleeve gastrectomy [Sleeve Resection]: Open surgery	equivalent	inexact
6	T	oui	6	Z54.99.72	Einsatz eines Implantats zur Gewebeverstärkung bei Enterostoma	Implant placement for tissue reinforcement in enterostomy	6910	5-466	operationen: Operationen am Verdauungstrakt: Andere Operationen an Dünn- und Dickdarm: Wiederherstellung der Kontinuität des Darmes bei endständigen Enterostomata	Procedures: Procedures on the digestive tract: Other procedures on small and large intestine: Restoration of intestinal continuity in cases of terminal enterostomata	equivalent	equal
4	T	oui	4	Z57.21	Vesikostomie	Urinary diversion to the skin	8084	5-565	operationen: Operationen an den Harnorganen: Operationen am Ureter: Kutane Harnableitung mit Darminterponat [Conduit] (nicht kontinentes Stoma)	Surgeries: Urinary tract surgeries: Ureteral surgeries: Cutaneous urinary diversion with intestinal interposition [conduit] (not continent stoma)	equivalent	equivalent
6	T	oui	6	Z57.6X.22	Partielle Zystektomie, Supratrigonale oder subtotale Resektion mit einseitiger oder beidseitiger Ureterneoimplantation, offen chirurgisch	Partial cystectomy, supra-trigonal or subtotal resection with unilateral or bilateral ureteroneocystostomy, open surgery	8240	5-575.6	operationen: Operationen an den Harnorganen: Operationen an der Harnblase: Partielle Harnblasenresektion: Supratrigonale Resektion mit einseitiger Ureterneoimplantation	operations: Operations on the urinary organs: Operations on the bladder: Partial cystectomy: Supra-trigonal resection with unilateral ureteroneocystostomy	equivalent	inexact
6	T	oui	6	Z78.08.15	Knochentransplantation an Tarsalia und Metatarsalia, allogen oder xenogen, Spongiosa und kortikospongiöser Span	Bone transplantation to tarsus and metatarsals, allograft or xenograft, spongiosa and corticospongious graft	9871	5-784.1	operationen: Operationen an den Bewegungsorganen: Operationen an anderen Knochen: Knochentransplantation und -transposition: Transplantation eines kortikospongiösen Spanes, autogen, offen chirurgisch	Surgeries on the locomotor system: Surgeries on other bones: Bone transplantation and transposition: Transplantation of a corticospongious graft, autogenous, open surgical	equivalent	equal
6	T	oui	6	Z7A.44.21	Kyphoplastie mit Wirbelkörperaufrichtung durch aufblähbaren Ballon, 1 Wirbelkörper	Kyphoplasty with vertebral body augmentation using an inflatable balloon, 1 vertebral body	11085	5-839.a	operationen: Operationen an den Bewegungsorganen: Operationen an der Wirbelsäule: Andere Operationen an der Wirbelsäule: Implantation von Material in einen Wirbelkörper mit Verwendung eines Systems zur intravertebralen, instrumentellen Wirbelkörperaufrichtung	operations on the musculoskeletal system: operations on the spine: other spinal surgeries: implantation of material into a vertebral body using a system for intravertebral, instrumental vertebral body alignment	equivalent	equal
4	T	oui	4	Z7A.79	Stabilisierung der Wirbelsäule und Stellungskorrektur, sonstige	Spinal stabilization and correction of alignment, other	11160	5-83w.1	operationen: Operationen an den Bewegungsorganen: Operationen an der Wirbelsäule: Zusatzinformationen zu Operationen an der Wirbelsäule: Dynamische Stabilisierung	operations: Operations on the locomotor system: Spinal surgery: Additional information on spinal surgery: Dynamic stabilization	equivalent	equal
6	T	oui	6	Z80.17.11	Arthroskopische Arthrotomie des oberen Sprunggelenkes, Entfernung freier Gelenkkörper	Arthroscopic arthrotomy of the ankle joint, removal of loose bodies	10442	5-810.4	operationen: Operationen an den Bewegungsorganen: Arthroskopische Gelenkoperationen: Arthroskopische Gelenkoperation: Entfernung freier Gelenkkörper	Surgeries: Surgeries on the locomotor system: Arthroscopic joint surgeries: Arthroscopic joint surgery: Removal of loose joint bodies	equivalent	equal
6	T	oui	6	Z80.97.30	Entnahme eines Knorpeltransplantates am Sprunggelenk	Harvesting of a cartilage graft at the ankle joint	10276	5-801.a	operationen: Operationen an den Bewegungsorganen: Offen chirurgische und andere Gelenkoperationen: Offen chirurgische Operation am Gelenkknorpel und an den Menisken: Entnahme eines Knorpeltransplantates	Surgeries: Surgeries on the locomotor system: Open surgical and other joint surgeries: Open surgical operations on articular cartilage and menisci: Harvesting a cartilage graft	equivalent	equal
4	T	oui	4	Z81.73	Totaler Handgelenkersatz	Total wrist arthroplasty	10778	5-824.8	operationen: Operationen an den Bewegungsorganen: Endoprothetischer Gelenk- und Knochenersatz: Implantation einer Endoprothese an Gelenken der oberen Extremität: Handgelenkendoprothese	Surgeries: Surgeries on the locomotor system: Joint and bone replacement surgery: Implantation of a joint prosthesis in upper extremity joints: Wrist arthroplasty	equivalent	equal
6	T	oui	6	Z81.82.33	Kapselraffung mit Fixation am Glenoid, arthroskopisch	Capsulectomy with fixation to the glenoid, arthroscopically	10513	5-814.5	operationen: Operationen an den Bewegungsorganen: Arthroskopische Gelenkoperationen: Arthroskopische Refixation und Plastik am Kapselbandapparat des Schultergelenkes: Kapselraffung mit Fixation am Glenoid durch Naht	Surgeries on the locomotor system: Arthroscopic joint surgeries: Arthroscopic fixation and reconstruction of the shoulder joint capsule apparatus: Capsule tightening with fixation to the glenoid by suture.	equivalent	equal
6	T	oui	6	Z81.96.31	Sonstige Rekonstruktion an Gelenken, Iliosakralgelenk, Refixation eines osteochondralen Fragmentes, arthroskopisch	Other reconstructions at joints, sacroiliac joint, fixation of an osteochondral fragment, arthroscopically	10269	5-801.3	operationen: Operationen an den Bewegungsorganen: Offen chirurgische und andere Gelenkoperationen: Offen chirurgische Operation am Gelenkknorpel und an den Menisken: Refixation eines osteochondralen Fragmentes	Surgeries on the locomotor system: Open surgical and other joint surgeries: Open surgical operations on articular cartilage and menisci: Fixation of an osteochondral fragment	equivalent	equal
6	T	oui	6	Z83.91.12	Lösung von Adhäsionen von Muskel, Sehne, Faszie und Bursa, Oberarm und Ellenbogen	Adhesions release of muscle, tendon, fascia, and bursa, upper arm and elbow	11322	5-85	operationen: Operationen an den Bewegungsorganen: Operationen an Muskeln, Sehnen, Faszien und Schleimbeuteln	Surgeries on the musculoskeletal system: Surgeries on muscles, tendons, fascia and synovial membranes	equivalent	equal
6	T	oui	6	Z86.85.40	Trennung einer kompletten Syndaktylie mit Verschiebeplastik, Kuppenplastik oder Seitenbandrekonstruktion, des Fusses	Separation of a complete syndactyly with transfer flap, wedge osteotomy, or lateral band reconstruction, of the foot	11986	5-918.1	operationen: Operationen an Haut und Unterhaut: Andere Operationen an Haut und Unterhaut: Syndaktylie- und Polydaktyliekorrektur der Zehen: Trennung einer kompletten Syndaktylie	operations: Operations on skin and subcutaneous tissue: Other operations on skin and subcutaneous tissue: Syndactyly and polydactyly correction of the toes: Separation of a complete syndactyly	equivalent	equal
6	T	oui	6	Z86.88.I8	Operative Anlage oder Wechsel eines Systems zur Vakuumversiegelung in Regional- oder Allgemeinanästhesie, tiefreichend, an Becken, Vulva, Perineum	Operative placement or exchange of a vacuum sealing system under regional or general anesthesia, deep, at the pelvis, vulva, perineum.	9354	5-716.5	operationen: Operationen an den weiblichen Genitalorganen: Operationen an der Vulva: Konstruktion und Rekonstruktion der Vulva (und des Perineums): Fistelverschluss	operations: Operations on the female genitalia: Operations on the vulva: Construction and reconstruction of the vulva (and perineum): Fistula closure	equivalent	equal
6	T	oui	6	Z87.41.15	Computertomographie des Herzens, mit Kontrastmittel, unter körperlicher Belastung	Cardiac computed tomography with contrast during physical stress	1535	3-224.1	bildgebende diagnostik: Computertomographie [Computertomographie]: Computertomographie [Computertomographie] mit Kontrastmittel: Computertomographie des Herzens mit Kontrastmittel: Unter physischer Belastung	Imaging studies: Computed tomography [CT]: CT [CT] with contrast agent: Cardiac CT with contrast agent: Under physical stress	equivalent	equivalent
6	T	oui	6	Z88.01.10	Computertomographie gesamtes Abdomen	Computed tomography of the entire abdomen	1541	3-225	bildgebende diagnostik: Computertomographie [Computertomographie]: Computertomographie [Computertomographie] mit Kontrastmittel: Computertomographie des Abdomens mit Kontrastmittel	imaging studies: computed tomography [CT]: CT [CT] with contrast agent: abdominal CT scan with contrast agent	equivalent	equal
6	T	oui	6	Z89.07.13	Vollständige Evaluation, ohne Aufnahme einer Patientin / eines Patienten auf eine Warteliste zur Herz-Lungen-Transplantation	Complete evaluation without placing a patient on a waiting list for heart-lung transplantation	1251	1-920.02	diagnostische massnahmen: Andere diagnostische Maßnahmen: Medizinische Evaluation zur Transplantation: Medizinische Evaluation und Entscheidung über die Indikation zur Transplantation: Vollständige Evaluation, ohne Aufnahme eines Patienten auf eine Warteliste zur Organtransplantation: Lungentransplantation	diagnostic measures: Other diagnostic measures: Medical evaluation for transplantation: Medical evaluation and decision regarding the indication for transplantation: Full evaluation, without listing a patient on an organ transplant waiting list: Lung transplantation	equivalent	equal
6	T	oui	6	Z93.92.11	Inhalationsanästhesie	Inhalational anesthesia	17903	8-901	nicht operative therapeutische massnahmen: Anästhesie und Schmerztherapie: Anästhesie: Inhalationsanästhesie	Non-operative therapeutic measures: Anesthesia and pain therapy: Anesthesia: Inhalation anesthesia	equivalent	equal
6	T	oui	6	Z93.9G.51	Invasive Beatmung, Ersteinstellung, innerhalb von 3 Tagen	Invasive ventilation, initiation, within 3 days	15843	8-718.81	nicht operative therapeutische massnahmen: Maßnahmen für das Atmungssystem: Maschinelle Beatmung und Atemunterstützung über Maske oder Tubus und Beatmungsentwöhnung: Beatmungsentwöhnung [Weaning] bei maschineller Beatmung: Prolongierte Beatmungsentwöhnung auf spezialisierter intensivmedizinischer Beatmungsentwöhnungs-Einheit: Mindestens 3 bis höchstens 5 Behandlungstage	Non-operative therapeutic measures: Respiratory system measures: Mechanical ventilation and respiratory support via mask or tube and weaning from mechanical ventilation: Weaning from mechanical ventilation: Prolonged weaning on a specialized intensive care unit weaning unit: Minimum 3 to maximum 5 treatment days.	equivalent	equal
6	T	oui	6	Z01.25.11	Sonstige Kraniektomie zur Entleerung eines epiduralen Hämatoms	Other craniotomy for evacuation of an epidural hematoma	15076	8-159.4	nicht operative therapeutische massnahmen: Therapeutische Katheterisierung, Aspiration, Punktion und Spülung: Therapeutische Aspiration und Entleerung durch Punktion: Andere therapeutische perkutane Punktion: Therapeutische perkutane Punktion eines Kephalhämatoms	Non-operative therapeutic measures: Therapeutic catheterization, aspiration, puncture and lavage: Therapeutic aspiration and drainage by puncture: Other therapeutic percutaneous punctures: Therapeutic percutaneous puncture of an epidural hematoma	inexact	equal
6	T	oui	6	Z01.32.11	Lobotomie und Traktotomie, Subpiale Transsektion	Lobotomy and tractotomy, subpial section	1893	5-013.75	operationen: Operationen am Nervensystem: Inzision (Trepanation), Exzision und Destruktion an Schädel, Gehirn und Hirnhäuten: Inzision von Gehirn und Hirnhäuten: Leukotomie [Lobotomie] oder Traktotomie: Multiple subpiale Transsektionen, multilobulär	Operations on the nervous system: Incision (trepanation), excision and destruction of skull, brain and meninges: Incision of brain and meninges: leucotomy [lobotomy] or tractotomy: multiple subpial transections, multilobular	inexact	equivalent
6	T	oui	6	Z03.03.09	Laminotomie, Laminektomie und Laminoplastik, sonstige	Laminectomy, laminoplasty, and lamino-plasty, other	2246	5-032.4	operationen: Operationen am Nervensystem: Operationen an Rückenmark, Rückenmarkhäuten und Spinalkanal: Zugang zur Lendenwirbelsäule, zum Os sacrum und zum Os coccygis: Laminektomie Lendenwirbelsäule	Surgeries: Neurosurgeries: Surgeries on spinal cord, meninges and spinal canal: Access to lumbar spine, sacrum and coccyx: Lumbar laminectomy	inexact	inexact
6	T	oui	6	Z06.6X.12	Exzision einer Thyreoidea lingualis, transzervikal, mit Resektion des medialen Zungenbeines	Excision of a lingual thyroid, transcervical, with resection of the medial tongue base	2806	5-069.21	operationen: Operationen an endokrinen Drüsen: Operationen an Schilddrüse und Nebenschilddrüse: Andere Operationen an Schilddrüse und Nebenschilddrüsen: Exzision einer Zungengrundschilddrüse: Transzervikal, ohne Resektion des medialen Zungenbeines	operations: Endocrine gland surgeries: Thyroid and parathyroid surgeries: Other thyroid and parathyroid surgeries: Excision of a lingual thyroid: Transcervical, without resection of the medial tongue base	inexact	equivalent
4	T	oui	4	Z09.43	Sondierung des Ductus nasolacrimalis	Dacryocystography	1075	1-681	diagnostische massnahmen: Diagnostische Endoskopie: Andere diagnostische Endoskopie: Diagnostische Endoskopie der Tränenwege	Diagnostic measures: Diagnostic endoscopy: Other diagnostic endoscopy: Diagnostic endoscopy of the lacrimal passages	inexact	inexact
4	T	oui	4	Z11.72	Keratophakie	Keratopathy	3222	5-123.3	operationen: Operationen an den Augen: Operationen an der Kornea: Exzision und Destruktion von (erkranktem) Gewebe der Kornea: Phototherapeutische Keratektomie	operations: Eye surgeries: Corneal surgeries: Excision and destruction of (diseased) corneal tissue: Phototherapeutic keratectomy	inexact	inexact
6	T	oui	6	Z19.29.11	Sonstige Revision einer Stapedotomie und Stapedektomie mit autogener Stapesprothese	Other revision of stapedectomy and stapectomy with autologous stapes prosthesis	3718	5-192.11	operationen: Operationen an den Ohren: Mikrochirurgische Operationen am Mittelohr: Revision einer Stapedektomie: Mit Wiedereröffnung des ovalen Fensters: Mit Implantation einer autogenen Prothese (z.B. nach Schuknecht)	operations: Ear surgeries: Microsurgical middle ear operations: Revision of stapedectomy: With re-opening of the oval window: With implantation of an autogenous prosthesis (e.g., according to Schuknecht)	inexact	inexact
4	T	oui	4	Z20.97	Implantation oder Ersatz einer einkanaligen Kochleaprothese	Implantation or replacement of a single-channel Cook valve	2717	5-059.e	operationen: Operationen am Nervensystem: Andere Operationen an Nerven und Nervenganglien: Andere Operationen an Nerven und Ganglien: Isolierter Wechsel des Sensors in der rechten Herzkammer bei einem kardialen Vagusnervstimulationssystem	Isolated sensor replacement in the right ventricle for a cardiac vagus nerve stimulation system.	inexact	inexact
6	T	oui	6	Z22.2X.23	Endonasale Nasennebenhöhlen-Eröffnung durch Ballondilatation, Sinus maxillaris	Endoscopic maxillary sinus opening via balloon dilation	4013	5-223.7	operationen: Operationen an Nase und Nasennebenhöhlen: Operationen an den Nasennebenhöhlen: Operationen an der Stirnhöhle: Ballondilatation des Eingangs der Stirnhöhle	Surgeries: Surgeries of the nose and paranasal sinuses: Paranasal sinus surgeries: Frontal sinus surgeries: Balloon dilation of the frontal sinus opening	inexact	equal
6	T	oui	6	Z37.24.20	Offene Perikardbiopsie	Open pericardiocentesis	1182	1-842	diagnostische massnahmen: Explorative diagnostische Maßnahmen: Diagnostische Punktion und Aspiration: Diagnostische Punktion des Perikardes [Perikardiozentese]	Diagnostic measures: Exploratory diagnostic measures: Diagnostic puncture and aspiration: Diagnostic puncture of the pericardium [pericardiocentesis]	inexact	inexact
6	T	oui	6	Z37.99.30	Ligatur eines Herzohres	Closure of an atrial septal defect	5539	5-374.7	operationen: Operationen am Herzen: Rhythmuschirurgie und andere Operationen an Herz und Perikard: Rekonstruktion des Perikardes und des Herzens: Verschluss eines erworbenen Vorhofseptumdefektes	Procedures: Cardiac surgeries: Arrhythmia surgery and other surgeries on the heart and pericardium: Reconstruction of the pericardium and heart: Closure of an acquired atrial septal defect	inexact	inexact
4	T	oui	4	Z44.41	Übernähung eines Ulcus ventriculi	Overgrowth of a gastric ulcer	6963	5-469.7	operationen: Operationen am Verdauungstrakt: Andere Operationen an Dünn- und Dickdarm: Andere Operationen am Darm: Übernähung eines Ulkus	Procedures: Procedures on the digestive tract: Other procedures on the small and large intestine: Other intestinal procedures: Ulcer oversewing	inexact	inexact
6	T	oui	6	Z45.92.11	Dünndarm-Rektum-Anastomose mit Bildung eines Reservoirs [Pouch]	Thin bowel-rectum anastomosis with formation of a reservoir [pouch]	6924	5-467.7	operationen: Operationen am Verdauungstrakt: Andere Operationen an Dünn- und Dickdarm: Andere Rekonstruktion des Darmes: Anlegen eines Reservoirs	Procedures: Gastrointestinal procedures: Other procedures on small and large intestine: Other intestinal reconstruction: Creation of a reservoir	inexact	inexact
6	T	oui	6	Z46.85.12	Bougierung des Darmes, laparoskopisch	Colonoscopy, laparoscopic	1032	1-652.1	diagnostische massnahmen: Diagnostische Endoskopie: Diagnostische Endoskopie des unteren Verdauungstraktes: Diagnostische Endoskopie des Darmes über ein Stoma: Koloskopie	Diagnostic measures: Diagnostic endoscopy: Diagnostic endoscopy of the lower gastrointestinal tract: Diagnostic endoscopy of the bowel through a stoma: Colonoscopy	inexact	inexact
6	T	oui	6	Z48.66.12	Manschettenresektion und tubuläre Resektion des Rektums, mit Enterostoma und Blindverschluss, offen chirurgisch	Fistulization and tubular resection of the rectum, with enterostomy and blind closure, open surgery	7074	5-486.2	operationen: Operationen am Verdauungstrakt: Operationen am Rektum: Rekonstruktion des Rektums: Verschluss einer Rektum-Haut-Fistel	operations: Operations on the digestive tract: Operations on the rectum: Rectal reconstruction: Closure of a rectal skin fistula	inexact	inexact
4	T	oui	4	Z49.03	Exzision von Marisken	Excision of margins	11754	5-894	operationen: Operationen an Haut und Unterhaut: Operationen an Haut und Unterhaut: Lokale Exzision von erkranktem Gewebe an Haut und Unterhaut	Surgeries on skin and subcutaneous tissue: Local excision of diseased tissue from skin and subcutaneous tissue	inexact	inexact
4	T	oui	4	Z49.94	Reposition eines Analprolapses	Repair of an anal prolapse	7175	5-496.0	operationen: Operationen am Verdauungstrakt: Operationen am Anus: Rekonstruktion des Anus und des Sphinkterapparates: Naht (nach Verletzung)	Procedures: Procedures on the digestive tract: Procedures on the anus: Reconstruction of the anus and sphincter apparatus: Suture (after injury)	inexact	inexact
6	T	oui	6	Z56.51.11	Aufbau einer kutanen Ureteroileostomie, Ureteroileokutaneostomie [Ileum-Conduit] oder Ureterokolokutaneostomie [Kolon-/Sigma-Conduit], laparoskopisch	Construction of a cutaneous ureterostomy, ureterocystoileostomy [ileum conduit] or ureterocutaneous colostomy [colon/sigmoid conduit], laparoscopically	8100	5-566.11	operationen: Operationen an den Harnorganen: Operationen am Ureter: Kutane Harnableitung mit Darmreservoir (kontinentes Stoma): Anlegen eines Ileozäkalreservoirs: Laparoskopisch	Surgeries: Urinary tract surgeries: Ureteral surgeries: Cutaneous urinary diversion with bowel reservoir (continent stoma): Creation of an ileocecal reservoir: Laparoscopic	inexact	inexact
4	T	oui	4	Z56.81	Lösung von intraluminalen Adhäsionen im Ureter	Treatment of intraluminal ureteral adhesions	14865	8-110.1	nicht operative therapeutische massnahmen: Entfernung von Fremdmaterial und Konkrementen: Extrakorporale Stoßwellentherapie: Extrakorporale Stoßwellenlithotripsie [Extrakorporale Stoßwellenlithotripsie] von Steinen in den Harnorganen: Ureter	Non-operative therapeutic measures: Removal of foreign material and concrements: Extracorporeal shock wave therapy: Extracorporeal shock wave lithotripsy [Extracorporeal shock wave lithotripsy] of stones in the urinary tract: ureter	inexact	equal
4	T	oui	4	Z65.01	Laparoskopische Ovariotomie	Laparoscopic oophorectomy	8793	5-650.3	operationen: Operationen an den weiblichen Genitalorganen: Operationen am Ovar: Inzision des Ovars: Vaginal, laparoskopisch assistiert	Surgeries on female genital organs: Ovarian surgeries: Incision of the ovary: Vaginal, laparoscopically assisted	inexact	inexact
4	T	oui	4	Z65.34	Ovarektomie, vaginal-laparoskopisch assistiert	Ovarianctomy, vaginally laparoscopically assisted	8793	5-650.3	operationen: Operationen an den weiblichen Genitalorganen: Operationen am Ovar: Inzision des Ovars: Vaginal, laparoskopisch assistiert	Surgeries on female genital organs: Ovarian surgeries: Incision of the ovary: Vaginal, laparoscopically assisted	inexact	inexact
4	T	oui	4	Z65.76	Laparoskopische Salpingoovarioplastik	Laparoscopic salpingo-oophorectomy	8812	5-653	operationen: Operationen an den weiblichen Genitalorganen: Operationen am Ovar: Salpingoovariektomie	Surgeries on female genital organs: Ovarian surgery: Salpingo-oophorectomy	inexact	inexact
6	T	oui	6	Z65.89.13	Sonstige Lösung von Adhäsionen von Ovar und Tuba uterina am Peritoneum des weiblichen Beckens, mit mikrochirurgischer Versorgung	Other adhesion solution of ovary and fallopian tube to the peritoneum of the female pelvis, with microsurgical treatment	8880	5-658.6	operationen: Operationen an den weiblichen Genitalorganen: Operationen am Ovar: Adhäsiolyse an Ovar und Tuba uterina mit mikrochirurgischer Versorgung: Am Peritoneum des weiblichen Beckens	Surgeries on female genital organs: Ovarian surgery: Adhesiolysis of ovary and fallopian tube with microsurgical care: On the peritoneum of the female pelvis	inexact	equal
3	T	oui	3	Z69.3	Parazervikale Uterusdenervation	Paravertebral uterine denervation	9127	5-694	operationen: Operationen an den weiblichen Genitalorganen: Andere Operationen am Uterus und Operationen an den Parametrien: Parazervikale Uterusdenervation	Operations on the female genital organs: Other operations on the uterus and operations on the parametria: Para-cervical uterine denervation	inexact	inexact
6	T	oui	6	Z77.28.10	Keilosteotomie am Talus	Calcaneal osteotomy	9965	5-788.5	operationen: Operationen an den Bewegungsorganen: Operationen an anderen Knochen: Operationen an Metatarsale und Phalangen des Fußes: Osteotomie	Surgeries on the locomotor system: Surgeries on other bones: Surgeries on metatarsals and phalanges of the foot: Osteotomy	inexact	inexact
6	T	oui	6	Z81.40.32	Pfannendachplastik am Hüftgelenk	Femoral acetabular impingement surgery	10431	5-80a	operationen: Operationen an den Bewegungsorganen: Offen chirurgische und andere Gelenkoperationen: Offen chirurgische Operationen am Labrum acetabulare	Surgeries on the locomotor system: Open surgical and other joint surgeries: Open surgical operations on the labrum acetabulare	inexact	inexact
6	T	oui	6	Z81.57.10	Gelenksersatz an Fuss und Zehen, Fusswurzelendoprothese	Joint replacement of foot and toes, foot ankle arthroplasty	10845	5-826.2	operationen: Operationen an den Bewegungsorganen: Endoprothetischer Gelenk- und Knochenersatz: Implantation einer Endoprothese an Gelenken der unteren Extremität: Vorfuß- oder Zehenendoprothese	Surgeries on the locomotor system: Joint and bone replacement surgery: Implantation of a prosthesis at joints of the lower extremity: Forefoot or toe prosthesis	inexact	inexact
6	T	oui	6	Z81.99.51	Arthrorise und Temporäre Fixation eines Gelenkes, Humeroglenoidalgelenk	Arthrolysis and temporary fixation of a joint, glenohumeral joint	10510	5-814.2	operationen: Operationen an den Bewegungsorganen: Arthroskopische Gelenkoperationen: Arthroskopische Refixation und Plastik am Kapselbandapparat des Schultergelenkes: Refixation eines knöchernen Labrumabrisses (Bankart-Läsion)	Surgeries on the musculoskeletal system: Arthroscopic joint surgeries: Arthroscopic fixation and reconstruction of the shoulder joint capsule ligaments: Fixation of a bony labral tear (Bankart lesion)	inexact	inexact
4	T	oui	4	Z82.03	Bursotomie an der Hand	Bursoscopy of the hand	594	1-484.b	diagnostische massnahmen: Biopsie ohne Inzision: Biopsie ohne Inzision an Knochen und Gelenken: Perkutane Biopsie an Gelenken und Schleimbeuteln mit Steuerung durch bildgebende Verfahren: Fingergelenk	Diagnostic measures: * Incisionless biopsy: Incisionless biopsy of bone and joints * Percutaneous biopsy of joints and bursae guided by imaging: finger joint	inexact	inexact
4	T	oui	4	Z82.61	Pollizisation mit Übertragung von Nerven und Blutversorgung	Nerve and blood supply transfer with grafting	2426	5-042.3	operationen: Operationen am Nervensystem: Operationen an Nerven und Nervenganglien: Exzision eines Nerven zur Transplantation: Nervus saphenus, gefäßgestieltes Transplantat	Procedures: Procedures on the nervous system: Operations on nerves and nerve ganglia: Excision of a nerve for transplantation: Saphenous nerve, vascularized graft	inexact	inexact
6	T	oui	6	Z82.86.10	Tenoplastik von Beugesehnen der Hand	Tendon transfer of the hand flexor tendons	11185	5-840.m	operationen: Operationen an den Bewegungsorganen: Operationen an der Hand: Operationen an Sehnen der Hand: Sehnenkopplung	surgeries: Surgeries on the locomotor system: Hand surgeries: Tendon surgeries of the hand: Tendon transfer	inexact	equal
6	T	oui	6	Z83.5X.15	Bursektomie, Leisten- und Genitalregion und Gesäss	Bursictomy, groin and genital region, and buttocks	8470	5-60...5-64	operationen: Operationen an den männlichen Genitalorganen	Surgeries on the male genitalia	inexact	equal
6	T	oui	6	Z83.88.33	Schaffung eines Sehnentransplantatlagers, Unterarm	Creation of a tendon transplant bank, forearm	11179	5-840.d	operationen: Operationen an den Bewegungsorganen: Operationen an der Hand: Operationen an Sehnen der Hand: Schaffung eines Transplantatlagers	surgeries: Surgeries on the locomotor system: Hand surgeries: Tendon surgeries of the hand: Creation of a transplant bed	inexact	equal
6	T	oui	6	Z83.8A.23	Revision von einer Plastik mit osteomyokutanem oder osteofasziokutanem Lappen, Unterarm	Revision of a flap with osteomyocutaneous or osteofasciocutaneous tissue, forearm	11549	5-866.1	operationen: Operationen an den Bewegungsorganen: Replantation, Exartikulation und Amputation von Extremitäten und andere Operationen an den Bewegungsorganen: Revision eines Amputationsgebietes: Unterarmregion	Surgeries on the musculoskeletal system: Reimplantation, disarticulation and amputation of limbs and other surgeries on the musculoskeletal system: Revision of an amputation site: forearm region	inexact	equal
4	T	oui	4	Z84.08	Schultergelenk-Exartikulation	Shoulder joint arthroplasty	10822	5-825.k0	operationen: Operationen an den Bewegungsorganen: Endoprothetischer Gelenk- und Knochenersatz: Revision, Wechsel und Entfernung einer Endoprothese an Gelenken der oberen Extremität: Teilwechsel einer Totalendoprothese Schultergelenk: Glenoidteil	Surgeries on the musculoskeletal system: Joint and bone replacement surgery: Revision, exchange, and removal of a prosthesis at joints of the upper extremity: Partial replacement of a total shoulder joint prosthesis: glenoid component	inexact	inexact
6	T	oui	6	Z85.A2.12	Hautsparende Mastektomie mit kompletter Resektion des Drüsengewebes, mit Straffung des Hautmantels	Skin-sparing mastectomy with complete resection of the glandular tissue, with skin flap tightening	11627	5-877.11	operationen: Operationen an der Mamma: Exzision und Resektion der Mamma: Subkutane Mastektomie und hautsparende Mastektomieverfahren: Hautsparende Mastektomie [Skin sparing mastectomy] mit kompletter Resektion des Drüsengewebes: Mit Straffung des Hautmantels	Surgeries: Breast surgeries: Excision and resection of the breast: Subcutaneous mastectomy and skin-sparing mastectomy procedures: Skin-sparing mastectomy [Skin sparing mastectomy] with complete resection of the glandular tissue: With tightening of the skin flap	inexact	equal
6	T	oui	6	Z85.G5.11	Plastische Rekonstruktion des Warzenhofs mit Tätowierung	Plastic reconstruction of the wart bed with tattooing	11739	5-890	operationen: Operationen an Haut und Unterhaut: Operationen an Haut und Unterhaut: Tätowieren und Einbringen von Fremdmaterial in Haut und Unterhaut	Surgeries: Skin and subcutaneous tissue surgeries: Skin and subcutaneous tissue surgeries: Tattooing and implantation of foreign material into skin and subcutaneous tissue	inexact	inexact
4	T	oui	4	Z85.I2	Gestielte Lappenplastik an Haut und Subkutangewebe der Mamma	Skin and subcutaneous tissue flap surgery of the breast	11738	5-89	operationen: Operationen an Haut und Unterhaut: Operationen an Haut und Unterhaut	Surgeries: Skin and subcutaneous tissue surgeries: Skin and subcutaneous tissue surgeries	inexact	wider
6	T	oui	6	Z86.2A.1D	Chirurgisches Débridement, kleinflächig, am Fuss	Surgical debridement, limited to the foot	11244	5-844.3	operationen: Operationen an den Bewegungsorganen: Operationen an der Hand: Operation an Gelenken der Hand: Debridement	Surgeries: Surgeries on the locomotor system: Hand surgeries: Joint surgery of the hand: Debridement	inexact	wider
6	T	oui	6	Z86.7A.16	Dehnungsplastik, kleinflächig, an der Hand	Skin grafting, small area, on the hand	11816	5-902.2	operationen: Operationen an Haut und Unterhaut: Operative Wiederherstellung und Rekonstruktion von Haut und Unterhaut: Freie Hauttransplantation, Empfängerstelle: Vollhaut, kleinflächig	Operations on skin and subcutaneous tissue: Surgical restoration and reconstruction of skin and subcutaneous tissue: Free skin graft, recipient site: full-thickness, small area	inexact	equal
6	T	oui	6	Z86.7A.3D	Verschiebe-Rotationsplastik, kleinflächig, am Fuss	Shift-rotation flap, small area, on the foot	11838	5-903.1	operationen: Operationen an Haut und Unterhaut: Operative Wiederherstellung und Rekonstruktion von Haut und Unterhaut: Lokale Lappenplastik an Haut und Unterhaut: Rotations-Plastik, kleinflächig	operations: Operations on skin and subcutaneous tissue: Surgical restoration and reconstruction of skin and subcutaneous tissue: Local flap surgery on skin and subcutaneous tissue: Rotation flap, small area	inexact	equal
6	T	oui	6	Z86.7A.8E	Insellappenplastik, grossflächig, an anderer Lokalisation	Inlay flap surgery, extensive, at another location	11843	5-903.6	operationen: Operationen an Haut und Unterhaut: Operative Wiederherstellung und Rekonstruktion von Haut und Unterhaut: Lokale Lappenplastik an Haut und Unterhaut: Rotations-Plastik, großflächig	operations: Operations on skin and subcutaneous tissue: Surgical restoration and reconstruction of skin and subcutaneous tissue: Local flap surgery on skin and subcutaneous tissue: Rotation flap, large area	inexact	inexact
6	T	oui	6	Z86.7B.17	Gestielte regionale Lappenplastik, an Brustwand und Rücken	Local flap surgery, to chest wall and back	11836	5-903	operationen: Operationen an Haut und Unterhaut: Operative Wiederherstellung und Rekonstruktion von Haut und Unterhaut: Lokale Lappenplastik an Haut und Unterhaut	Surgeries: Surgeries on skin and subcutaneous tissue: Operative restoration and reconstruction of skin and subcutaneous tissue: Local flap surgery on skin and subcutaneous tissue	inexact	wider
6	T	oui	6	Z86.7D.1C	Plastik mit freiem Lappen mit mikrovaskulärer Anastomosierung, am Unterschenkel	Skin flap reconstruction with microsurgical anastomosis on the lower leg	11858	5-905.0	operationen: Operationen an Haut und Unterhaut: Operative Wiederherstellung und Rekonstruktion von Haut und Unterhaut: Lappenplastik an Haut und Unterhaut, Empfängerstelle: Freier Lappen mit mikrovaskulärer Anastomosierung	Procedures: Operations on skin and subcutaneous tissue: Surgical restoration and reconstruction of skin and subcutaneous tissue: Skin and subcutaneous flap surgery, recipient site: Free flap with microvascular anastomosis	inexact	wider
6	T	oui	6	Z88.79.40	Endosonographie der weiblichen Geschlechtsorgane, transrektal	Transrectal endovaginal ultrasound	1461	3-05c.0	bildgebende diagnostik: Ultraschalluntersuchungen: Endosonographie: Endosonographie der männlichen Genitalorgane: Transrektal	imaging studies: ultrasound examinations: endosonography: endosonography of the male genital organs: transrectal	inexact	equal
4	T	oui	4	Z00.22	Intravaskuläre Bildgebung von intrathorakalen Gefässen	Intravenous imaging of intrathoracic vessels	1580	3-603	bildgebende diagnostik: Darstellung des Gefäßsystems: Arteriographie: Arteriographie der thorakalen Gefäße	Imaging studies: Vascular imaging: Arteriography: Thoracic arterial arteriography	narrower	narrower
6	T	oui	6	Z42.7X.31	Ösophago-Gastromyotomie, offen chirurgisch	Open esophageal myotomy	6340	5-420.0	operationen: Operationen am Verdauungstrakt: Operationen am Ösophagus: Inzision des Ösophagus: Ösophagomyotomie	operations: Operations on the digestive tract: Operations on the esophagus: Incision of the esophagus: Esophagomyotomy	narrower	inexact
6	T	oui	5	Z49.77.12	Anoproktoplastik, perineal	Analoplasty, perineal	7171	5-495.6	operationen: Operationen am Verdauungstrakt: Operationen am Anus: Primäre plastische Rekonstruktion bei anorektalen Anomalien: Analplastik, perineal	operations: Operations on the digestive tract: Operations on the anus: Primary plastic reconstruction in anorectal anomalies: Analplasty, perineal	narrower	narrower
6	T	oui	6	Z49.78.09	Rekonstruktion kongenitaler anorektaler Agenesien und Analatresien, sonstige	Reconstruction of congenital anal agenesis and atresia, others	7165	5-495	operationen: Operationen am Verdauungstrakt: Operationen am Anus: Primäre plastische Rekonstruktion bei anorektalen Anomalien	Procedures: Procedures on the digestive tract: Procedures on the anus: Primary plastic reconstruction in anorectal anomalies	narrower	narrower
6	T	oui	6	Z51.16.10	Perkutan-transhepatische Endoskopie der Gallenwege	Percutaneous transhepatic endoscopic biliary drainage	7384	5-514.u	operationen: Operationen am Verdauungstrakt: Operationen an Gallenblase und Gallenwegen: Andere Operationen an den Gallengängen: Therapeutische perkutan-transhepatische Endoskopie der Gallenwege	Procedures: Procedures on the digestive tract: Operations on the gallbladder and bile ducts: Other operations on the biliary system: Therapeutic percutaneous transhepatic cholangiography	narrower	wider
4	T	oui	4	Z51.79	Plastische Rekonstruktion des Ductus cysticus und der Ducti hepatici	Plastic reconstruction of the cystic duct and common hepatic duct	7418	5-518.6	operationen: Operationen am Verdauungstrakt: Operationen an Gallenblase und Gallenwegen: Operationen an Sphincter Oddi und Papilla duodeni major: Plastische Rekonstruktion	Procedures: Procedures on the digestive tract: Operations on the gallbladder and bile ducts: Operations on the sphincter of Oddi and major duodenal papilla: Plastic reconstruction	narrower	equal
6	T	oui	6	Z53.71.21	Operation einer Zwerchfellhernie, abdominaler Zugang, offen chirurgisch, mit Implantation von Membranen und Netzen	Operation of a hiatal hernia, abdominal approach, open surgery, with implantation of membranes and meshes	7689	5-538.1	operationen: Operationen am Verdauungstrakt: Verschluss abdominaler Hernien: Verschluss einer Hernia diaphragmatica: Offen chirurgisch, mit plastischem Bruchpfortenverschluss	Procedures: Gastrointestinal procedures: Abdominal hernia repair: Repair of a diaphragmatic hernia: Open surgically, with prosthetic mesh repair.	narrower	equal
6	T	oui	6	Z80.01.44	Entfernen Inlay sowie Kopf, Totalendoprothese Schultergelenk	Removal of inlay and total shoulder arthroplasty	10810	5-825.8	operationen: Operationen an den Bewegungsorganen: Endoprothetischer Gelenk- und Knochenersatz: Revision, Wechsel und Entfernung einer Endoprothese an Gelenken der oberen Extremität: Entfernung einer Totalendoprothese Schultergelenk	Surgeries on the musculoskeletal system: Joint and bone replacement surgery: Revision, exchange, and removal of a prosthesis at joints of the upper extremity: Removal of a total shoulder arthroplasty	narrower	inexact
4	T	oui	4	Z84.57	Entfernen von Spacer (Zement)	Entfernen von Spacer	10905	5-829.f	operationen: Operationen an den Bewegungsorganen: Endoprothetischer Gelenk- und Knochenersatz: Andere gelenkplastische Eingriffe: Wechsel von Abstandshaltern	operations: Operations on the locomotor system: Prosthetic joint and bone replacement: Other arthroplasty procedures: Replacement of spacers	unmatched	wider
6	T	oui	6	Z28.2X.12	Abszesstonsillektomie	Tonsillectomy	4397	5-281.0	operationen: Operationen an Mundhöhle und Gesicht: Operationen im Bereich des Naso- und Oropharynx: Tonsillektomie (ohne Adenotomie): Mit Dissektionstechnik	Surgeries: Surgeries of the oral cavity and face: Surgeries in the area of the nasopharynx and oropharynx: Tonsillectomy (without adenotomy): With dissection technique	wider	wider
4	T	oui	4	Z31.61	Naht einer Rissverletzung am Larynx	Laryngeal laceration repair	4601	5-315.0	operationen: Operationen an Pharynx, Larynx und Trachea: Andere Larynxoperationen und Operationen an der Trachea: Rekonstruktion des Larynx: Naht (nach Verletzung)	Procedures: Operations on pharynx, larynx and trachea: Other laryngeal operations and tracheal operations: Larynx reconstruction: Suture (after injury)	wider	inexact
6	T	oui	6	Z35.C4.11	Segelrekonstruktion der Trikuspidalklappe über vollständige Sternotomie	Reconstruction of the tricuspid valve via full sternotomy	5376	5-35a.5	operationen: Operationen am Herzen: Operationen an Klappen und Septen des Herzens und herznaher Gefäße: Minimalinvasive Operationen an Herzklappen: Endovaskuläre Trikuspidalklappenrekonstruktion	Procedures: Cardiac surgeries: Surgeries on valves and septa of the heart and nearby blood vessels: Minimally invasive heart valve surgeries: Endovascular tricuspid valve reconstruction	wider	wider
4	T	oui	4	Z51.72	Choledochoplastik	Biliary reconstruction	7395	5-516	operationen: Operationen am Verdauungstrakt: Operationen an Gallenblase und Gallenwegen: Andere Rekonstruktion der Gallengänge	Procedures: Procedures on the digestive tract: Operations on the gallbladder and bile ducts: Other reconstruction of the biliary tract	wider	wider
6	T	oui	6	Z52.11.12	Feinnadelbiopsie am Pankreas, endosonographisch	Fine-needle aspiration biopsy of the pancreas, endoscopic	410	1-447	diagnostische massnahmen: Biopsie ohne Inzision: Biopsie ohne Inzision an den Verdauungsorganen: Endosonographische Feinnadelpunktion am Pankreas	Diagnostic measures: Incisional biopsy: Incisional biopsy of the digestive organs: Endoscopic fine-needle aspiration of the pancreas	wider	wider
4	T	oui	4	Z54.11	Probelaparotomie	Laparotomy	7001	5-471.0	operationen: Operationen am Verdauungstrakt: Operationen an der Appendix: Simultane Appendektomie: Während einer Laparotomie aus anderen Gründen	operations: Operations on the digestive tract: Appendix operations: Simultaneous appendectomy: During a laparotomy for other reasons	wider	inexact
6	T	oui	6	Z81.52.5B	Implantation von Schaft, Kopf sowie Inlay einer Hüftendoprothese bei einem Wechsel	Implantation of stem, head, and inlay of a hip prosthesis during a revision	10559	5-820	operationen: Operationen an den Bewegungsorganen: Endoprothetischer Gelenk- und Knochenersatz: Implantation einer Endoprothese am Hüftgelenk	Surgeries on the musculoskeletal system: Joint and bone replacement with prostheses: Implantation of a prosthesis at the hip joint	wider	equal
6	T	oui	6	Z81.95.13	Naht des hinteren Kreuzbandes des Knies, offen chirurgisch	Open surgical repair of the posterior cruciate ligament of the knee	10312	5-803.5	operationen: Operationen an den Bewegungsorganen: Offen chirurgische und andere Gelenkoperationen: Offen chirurgische Bandplastik am Kniegelenk: Hinteres Kreuzband mit alloplastischem Bandersatz	operations: Operations on the locomotor system: Open surgical and other joint operations: Open surgical ligament reconstruction of the knee joint: Posterior cruciate ligament with alloplastic graft	wider	equal
6	T	oui	6	Z81.95.1A	Naht des dorsalen Kapselbandapparates des Knies, arthroskopisch	Dorsal capsule ligament repair of the knee, arthroscopically	10500	5-813.f	operationen: Operationen an den Bewegungsorganen: Arthroskopische Gelenkoperationen: Arthroskopische Refixation und Plastik am Kapselbandapparat des Kniegelenkes: Plastik des dorsalen Kapselbandapparates	Surgeries on the locomotor system: Arthroscopic joint surgeries: Arthroscopic fixation and reconstruction of the capsule ligament apparatus of the knee joint: Reconstruction of the dorsal capsule ligament apparatus	wider	equal
6	T	oui	6	Z82.01.99	Exploration an der Handsehnenscheide, sonstige	Exploration of the tendon sheath, other	11190	5-840.s	operationen: Operationen an den Bewegungsorganen: Operationen an der Hand: Operationen an Sehnen der Hand: Exploration	operations: Operations on the locomotor system: Operations on the hand: Tendon operations of the hand: Exploration	wider	equal
4	T	oui	4	Z86.51	Reimplantation von Kopfhaut	Skin graft reimplantation	11870	5-907	operationen: Operationen an Haut und Unterhaut: Operative Wiederherstellung und Rekonstruktion von Haut und Unterhaut: Revision einer Hautplastik	Surgeries: Skin and subcutaneous tissue surgeries: Operative restoration and reconstruction of skin and subcutaneous tissue: Revision of a skin graft	wider	equal
4	T	oui	4	Z88.03	Fistulographie der Bauchwand	paroi fistulography	1512	3-13m	bildgebende diagnostik: Projektionsradiographie: Projektionsradiographie mit Kontrastmittelverfahren: Fistulographie	imaging studies: projection radiography: contrast-enhanced projection radiography: fistulography	wider	inexact
6	T	oui	6	Z52.95.80	Implantation eines Markers oder Tracers zur Lokalisation bzw. Steuerung der therapeutischen Intervention am Pankreas, perkutan	Implantation of a marker or tracer for localization and/or guidance of therapeutic interventions on the pancreas, percutaneously	7551	5-529.q0	operationen: Operationen am Verdauungstrakt: Operationen am Pankreas: Andere Operationen am Pankreas und am Pankreasgang: Implantation von Bestrahlungsmarkern am Pankreas: Perkutan	Procedures: Procedures on the digestive tract: Pancreatic procedures: Other procedures on the pancreas and pancreatic duct: Implantation of radiation markers in the pancreas: Percutaneous		equal

## Sheet: T3 eval2
Supplementary Table 3. Evaluation 2
nbchar	item type	codable	indent level	CHOP_code	CHOP_text	CHOP_translation	index	OPS_code	OPS_text	OPS_translation	Tx Validation KT CHOP -> English	comment KT	X Snomed Validation CHOP Tx OMOP CDM ID	X Snomed Validation CHOP Tx OMOP CDM text	X Snomed Validation CHOP Tx SNOMED Concept ID	X Snomed Validation OPS Tx OMOP CDM ID	X Snomed Validation OPS Tx OMOP CDM text	X Snomed Validation OPS Tx SNOMED Concept ID	X OMOP CDM Validation CHOP OPS	X Snomed Validation CHOP OPS	Tx X Validation CHOP OPS -> OMOP CDM
4	T	oui	4	Z00.22	Intravaskuläre Bildgebung von intrathorakalen Gefässen	Intravenous imaging of intrathoracic vessels	1580	3-603	bildgebende diagnostik: Darstellung des Gefäßsystems: Arteriographie: Arteriographie der thorakalen Gefäße	Imaging studies: Vascular imaging: Arteriography: Thoracic arterial arteriography	narrower		40489471	Incision of intrathoracic vascular structure	448375001	4118450	Specific angiography studies	303848004	36371021	144526997	inexact
6	T	oui	6	Z00.66.22	Koronarangioplastik [PTCA] mit Antikörper-beschichteten Ballons	Coronary angioplasty [PTCA] with antibody-coated balloons	17388	8-83b.b1	nicht operative therapeutische massnahmen: Maßnahmen für den Blutkreislauf: Therapeutische Katheterisierung und Kanüleneinlage in Gefäße: Zusatzinformationen zu Materialien: Art der verwendeten Ballons: Antikörperbeschichtete Ballons	Non-operative therapeutic measures: Measures for the circulatory system: Therapeutic catheterization and cannulation of vessels: Additional information on materials: Type of balloons used: Antibody-coated balloons	equal		4006788	Percutaneous transluminal coronary angioplasty	11101003	4181203	Non-operative procedure on auditory system	363239006	-174415	-352138003	inexact
6	T	oui	6	Z00.66.36	Perkutan-transluminale Gefässintervention an den Koronarien mittels Thrombektomie	Percutaneous transluminal coronary angioplasty with thrombectomy	17160	8-837.t	nicht operative therapeutische massnahmen: Maßnahmen für den Blutkreislauf: Therapeutische Katheterisierung und Kanüleneinlage in Gefäße: Perkutan-transluminale Gefäßintervention an Herz und Koronargefäßen: Thrombektomie aus Koronargefäßen	Non-operative therapeutic measures: Measures for the circulatory system: Therapeutic catheterization and cannulation of vessels: Percutaneous transluminal intervention of heart and coronary arteries: Coronary artery thrombectomy	equivalent		4006788	Percutaneous transluminal coronary angioplasty	11101003	4337738	Percutaneous endarterectomy of coronary artery	232726007	-330950	-221625004	narrower
6	T	oui	6	Z00.66.42	Selektive Embolisation von Koronarien mit embolisierenden (ablösbaren) Ballons	Selective coronary embolization with embolizing (detachable) balloons	17101	8-837.72	nicht operative therapeutische massnahmen: Maßnahmen für den Blutkreislauf: Therapeutische Katheterisierung und Kanüleneinlage in Gefäße: Perkutan-transluminale Gefäßintervention an Herz und Koronargefäßen: Selektive Embolisation und/oder Infarzierung: Mit ablösbaren Ballons	Non-operative therapeutic measures: Measures for the circulatory system: Therapeutic catheterization and cannulation into vessels: Percutaneous transluminal intervention of heart and coronary arteries: Selective embolization and/or infarction with detachable balloons	equal		4211707	Selective embolization of artery	57238002	4068647	Percutaneous embolization of hepatic artery	174466003	143060	-117228001	narrower
6	T	oui	6	Z00.98.12	Postoperative intrathekale und intraventrikuläre Medikamentendosis-Anpassung	Postoperative adjustment of intrathecal and intraventricular medication doses	14765	8-011.32	nicht operative therapeutische massnahmen: Applikation von Medikamenten und Nahrung und therapeutische Injektion: Applikation von Medikamenten und Nahrung: Intrathekale und intraventrikuläre Applikation von Medikamenten durch Medikamentenpumpen: Postoperative intrathekale und intraventrikuläre Medikamentendosis-Anpassung nach Anlage der Medikamentenpumpe: Bei einer implantierten programmierbaren …	Non-operative therapeutic measures: Application of medication and nutrition and therapeutic injections: Application of medication and nutrition: Intrathecal and intraventricular application of medication via drug pumps: Postoperative adjustment of intrathecal and intraventricular medication doses after implantation of the drug pump: In case of an implanted programmable drug pump with continuous r…	equal		4112122	Adjustment of implant	286560000	37152383	Continuous positive airway pressure with an assured constant airway pressure adjunct	1186678006	-33040261	-900118006	inexact
4	T	oui	4	Z01.10	Monitoring des intrakraniellen Drucks	Monitoring of intracranial pressure	18	1-204.0	diagnostische massnahmen: Untersuchung einzelner Körpersysteme: Neurologische Untersuchungen: Untersuchung des Liquorsystems: Messung des Hirndruckes	Diagnostic measures: Examination of individual body systems: Neurological examinations: Examination of the cerebrospinal fluid system: Measurement of intracranial pressure	equal		4052738	Intracranial pressure monitor removal	12480009	4163873	Neurological investigation	399210005	-111135	-386729996	wider
6	T	oui	6	Z01.12.99	Offene Biopsie an den Hirnhäuten, sonstige	Open biopsy of the meninges, other	231	1-401.5	diagnostische massnahmen: Biopsie ohne Inzision: Biopsie ohne Inzision an Nervensystem und endokrinen Organen: Perkutane Biopsie an intrakraniellem Gewebe mit Steuerung durch bildgebende Verfahren: Hirnhäute	Diagnostic measures: Biopsy without incision: Biopsy without incision of nervous system and endocrine organs: Percutaneous biopsy of intracranial tissue with image-guided control: Dura mater	equal		4326032	Biopsy of meninges	430112000	44789828	Diagnostic imaging of central nervous system	227191000000105	-40463796	-227190569888105	inexact
6	T	oui	6	Z01.16.11	Monitoring der zerebralen Sauerstoffsättigung [PtiO2], invasiv	Monitoring of cerebral oxygen saturation [PtiO2], invasive	17984	8-923.0	nicht operative therapeutische massnahmen: Patientenmonitoring: Neurologisches Monitoring: Monitoring der hirnvenösen Sauerstoffsättigung: Invasiv	Non-operative therapeutic measures: Patient monitoring: Neurological monitoring: Monitoring of cerebral venous oxygen saturation: Invasive	equal		4275888	Cerebral meningeorrhaphy	64265001	4303452	Positioning: neurologic	386427000	-27564	-322161999	inexact
6	T	oui	6	Z01.23.20	Rekraniotomie mit Entfernen von alloplastischem Material oder Medikamententrägers aus dem Schädelknochen	Craniotomy with removal of alloplastic material or drug carrier from the skull bone	1865	5-012.5	operationen: Operationen am Nervensystem: Inzision (Trepanation), Exzision und Destruktion an Schädel, Gehirn und Hirnhäuten: Inzision der Schädelknochen [Kraniotomie und Kraniektomie]: Entfernung von alloplastischem Material aus einem Schädelknochen	Surgeries on the nervous system: Incision (trepanation), excision and destruction of skull, brain and meninges: Incision of the skull bone [craniotomy and craniectomy]: Removal of alloplastic material from a skull bone	equal		4049661	Craniotomy for decompression of skull fracture	20912009	37162968	Craniectomy of base of skull and excision of midline neoplasm of brain	1202019006	-33113307	-1181106997	narrower
6	T	oui	6	Z01.25.11	Sonstige Kraniektomie zur Entleerung eines epiduralen Hämatoms	Other craniotomy for evacuation of an epidural hematoma	15076	8-159.4	nicht operative therapeutische massnahmen: Therapeutische Katheterisierung, Aspiration, Punktion und Spülung: Therapeutische Aspiration und Entleerung durch Punktion: Andere therapeutische perkutane Punktion: Therapeutische perkutane Punktion eines Kephalhämatoms	Non-operative therapeutic measures: Therapeutic catheterization, aspiration, puncture and lavage: Therapeutic aspiration and drainage by puncture: Other therapeutic percutaneous punctures: Therapeutic percutaneous puncture of an epidural hematoma	inexact	-ectomy, -otomy	40489805	Craniotomy and evacuation of traumatic hematoma	446816008	4076067	Therapeutic percutaneous puncture of bone	179275000	36413738	267541008	wider
6	T	oui	6	Z01.27.10	Entfernung eines intrazerebralen Katheters zur intraventrikulären Infusion	Removal of an intracranial catheter for intraventricular infusion	2136	5-028.8	operationen: Operationen am Nervensystem: Andere Operationen an Schädel, Gehirn und Hirnhäuten: Funktionelle Eingriffe an Schädel, Gehirn und Hirnhäuten: Entfernung eines intrazerebralen Katheters zur intraventrikulären Infusion	Procedures: Neurosurgical procedures: Other procedures on skull, brain and meninges: Functional interventions on skull, brain and meninges: Removal of an intracranial catheter for intraventricular infusion	equal		4047019	Removal of intracranial pressure catheter	230950007	4047019	Removal of intracranial pressure catheter	230950007	0	0	equal
6	T	oui	6	Z01.32.11	Lobotomie und Traktotomie, Subpiale Transsektion	Lobotomy and tractotomy, subpial section	1893	5-013.75	operationen: Operationen am Nervensystem: Inzision (Trepanation), Exzision und Destruktion an Schädel, Gehirn und Hirnhäuten: Inzision von Gehirn und Hirnhäuten: Leukotomie [Lobotomie] oder Traktotomie: Multiple subpiale Transsektionen, multilobulär	Operations on the nervous system: Incision (trepanation), excision and destruction of skull, brain and meninges: Incision of brain and meninges: leucotomy [lobotomy] or tractotomy: multiple subpial transections, multilobular	inexact		4298092	Lobotomy and tractotomy	76961002	4180459	Multiple subpial transections of cerebral cortex	429510003	117633	-352549001	narrower
6	T	oui	6	Z01.39.21	Sonstige Inzision am Gehirn, Stereotaktische Entleerung eines intrakraniellen Abszesses	Other incision on the brain, stereotactic drainage of an intracranial abscess	1906	5-014.2	operationen: Operationen am Nervensystem: Inzision (Trepanation), Exzision und Destruktion an Schädel, Gehirn und Hirnhäuten: Stereotaktische Operationen an Schädel, Gehirn und Hirnhäuten: Entleerung eines intrakraniellen Abszesses	Surgeries on the nervous system: Incision (trepanation), excision and destruction of skull, brain and meninges: Stereotactic surgeries on skull, brain and meninges: Drainage of an intracranial abscess	equal		4108316	Incision and drainage of abscess	284181007	40487469	Incision and drainage of abscess of skin	446403000	-36379153	-162221993	equivalent
6	T	oui	6	Z01.39.50	Entfernung eines intrakraniellen Implantats	Removal of an intracranial implant	2167	5-029.b	operationen: Operationen am Nervensystem: Andere Operationen an Schädel, Gehirn und Hirnhäuten: Andere Operationen an Schädel, Gehirn und Hirnhäuten: Entfernung einer Neuroprothese	Procedures: Neurosurgical procedures: Other procedures on skull, brain and meninges: Other procedures on skull, brain and meninges: Removal of a neuroprosthesis	equal		4154603	Removal of implant	284101009	4069713	Removal of skull plate	17669008	84890	266432001	narrower
6	T	oui	6	Z01.53.10	Lobektomie am Gehirn, hirneigenes intrazerebrales Tumorgewebe	Lobectomy of the brain, intracranial tumor tissue	1939	5-015.0	operationen: Operationen am Nervensystem: Inzision (Trepanation), Exzision und Destruktion an Schädel, Gehirn und Hirnhäuten: Exzision und Destruktion von erkranktem intrakraniellem Gewebe: Intrazerebrales Tumorgewebe, hirneigen	Surgeries on the nervous system: Incision (trepanation), excision and destruction of skull, brain and meninges: Excision and destruction of diseased intracranial tissue: Intracerebral tumor tissue, brain-own	equal		4200691	Lobectomy of brain	53423001	4243455	Resection of cerebral meninges	38512006	-42764	14910995	inexact
6	T	oui	6	Z01.6X.22	Exzision und Destruktion von sonstigem erkrankten Gewebe an der Kalotte mit Hirnhäuten	Excision and destruction of other diseased tissue on the skull with meninges	1967	5-016.5	operationen: Operationen am Nervensystem: Inzision (Trepanation), Exzision und Destruktion an Schädel, Gehirn und Hirnhäuten: Exzision und Destruktion von erkranktem Gewebe der Schädelknochen: Schädelbasis und Hirnhäute, sonstiges erkranktes Gewebe	Surgeries on the nervous system: Incision (trepanation), excision and destruction of skull, brain and meninges: Excision and destruction of diseased tissue of the cranial bones: Skull base and meninges, other diseased tissue	equal		42537288	Excision of lesion of base of skull with reconstruction	736613009	4075877	Excision of base of skull in anterior cranial fossa	178387004	38461411	558226005	narrower
6	T	oui	6	Z02.05.11	Einsetzen eines CAD-Implantats an Hirnschädel ohne Beteiligung des Gesichtsschädels, grosser oder komplexer Defekt	Placement of a CAD implant in the cranial vault without involvement of the facial skull, large or complex defect	2016	5-020.71	operationen: Operationen am Nervensystem: Andere Operationen an Schädel, Gehirn und Hirnhäuten: Kranioplastik: Rekonstruktion des Hirnschädels ohne Beteiligung des Gesichtsschädels, mit alloplastischem Material: Mit computerassistiert vorgefertigtem Implantat [Computer assisted design-Implantat], einfacher Defekt	Procedures: Neurosurgical procedures: Other procedures on skull, brain and meninges: Cranioplasty: Reconstruction of the cranial vault without involvement of the facial skull, with alloplastic material: With computer-assisted prefabricated implant [Computer-aided design-implant], simple defect	equal		44783406	Reconstruction of cranial defect with skull plate	699497002	44783406	Reconstruction of cranial defect with skull plate	699497002	0	0	equal
6	T	oui	6	Z02.12.21	Sonstige Duraplastik mit Kranioplastik an der Konvexität	Other dural plastic with cranioplasty on the convexity	2028	5-021.4	operationen: Operationen am Nervensystem: Andere Operationen an Schädel, Gehirn und Hirnhäuten: Rekonstruktion der Hirnhäute: Duraplastik mit Kranioplastik an der Konvexität	Surgeries: Neurosurgeries: Other surgeries on skull, brain and meninges: Reconstruction of the meninges: Duraplasty with cranioplasty on the convexity	equal		4170750	Fluoroscopy guided angioplasty with contrast	419806005	4207599	Reduction and reconstruction of craniomegalic skull with craniotomy	439844007	-36849	-20038002	inexact
4	T	oui	4	Z02.33	Ventrikelshunt zur Thoraxhöhle	Ventricular shunt to the pleural cavity	2065	5-023.2	operationen: Operationen am Nervensystem: Andere Operationen an Schädel, Gehirn und Hirnhäuten: Anlegen eines Liquorshuntes [Shunt-Implantation]: Ableitung in den Pleuraspalt	Procedures: Neurosurgical procedures: Other procedures on skull, brain and meninges: Placement of a shunt (shunt implantation): Drainage into the pleural space	equal		4228192	Cerebral ventricular to thoracic cavity shunt	88851005	4162869	Implementation of protective measures during neurosurgical procedures	372066005	65323	-283215000	inexact
6	T	oui	6	Z02.41.20	Spülung und Exploration eines Ventrikelshunts, peripherer Teil	Irrigation and exploration of a ventricular shunt, peripheral portion	2078	5-024.4	operationen: Operationen am Nervensystem: Andere Operationen an Schädel, Gehirn und Hirnhäuten: Revision und Entfernung von Liquorableitungen: Probatorisches Abklemmen des peripheren Katheters	Procedures: Neurosurgical procedures: Other procedures on skull, brain and meninges: Revision and removal of cerebrospinal fluid shunts: Trial clamping of the peripheral catheter	equal		4282631	Irrigation of ventricular shunt	6737003	4128500	CSF shunt removal	288846002	154131	-282108999	inexact
6	T	oui	6	Z02.93.32	Implantation oder Wechsel von temporären Mikroelektroden zur multilokulären Ableitung und Stimulation	Implantation or exchange of temporary microelectrodes for multilocular recording and stimulation	2145	5-028.b	operationen: Operationen am Nervensystem: Andere Operationen an Schädel, Gehirn und Hirnhäuten: Funktionelle Eingriffe an Schädel, Gehirn und Hirnhäuten: Implantation eines temporären subduralen Neuroelektrodensystems (Grid)	Procedures: Neurosurgical procedures: Other procedures on skull, brain and meninges: Functional procedures on skull, brain and meninges: Implantation of a temporary subdural neuroelectrode system (grid)	equal		37154077	Implantation of temporary spinal cord stimulator	1259003008	4050676	Laminectomy for implantation of neurostimulator electrodes, subdural	21089001	33103401	1237914007	narrower
6	T	oui	6	Z02.93.42	Revision ohne Ersatz der Elektroden zur intrakraniellen Neurostimulation, stereotaktisch, permanentes Mehrelektrodensystem zur Dauerstimulation	Revision without replacement of electrodes for intracranial neurostimulation, stereotactically, permanent multielectrode system for continuous stimulation	2133	5-028.5	operationen: Operationen am Nervensystem: Andere Operationen an Schädel, Gehirn und Hirnhäuten: Funktionelle Eingriffe an Schädel, Gehirn und Hirnhäuten: Revision einer permanenten Neurostimulationselektrode zur Dauerstimulation	Procedures: Procedures on the nervous system: Other procedures on skull, brain and meninges: Functional interventions on skull, brain and meninges: Revision of a permanent neurostimulation electrode for continuous stimulation	equal		4066518	Revision of spinal neurostimulator electrodes	17286005	4332727	Peripheral nerve neurostimulator electrode procedures	231120008	-266209	-213834003	wider
6	T	oui	6	Z02.99.14	Stereotaktische Implantation, Revision oder Wechsel von intrazerebralen Kathetern zur intraventrikulären Infusion	Stereotactic implantation, revision, or exchange of intracranial catheters for intraventricular infusion	2136	5-028.8	operationen: Operationen am Nervensystem: Andere Operationen an Schädel, Gehirn und Hirnhäuten: Funktionelle Eingriffe an Schädel, Gehirn und Hirnhäuten: Entfernung eines intrazerebralen Katheters zur intraventrikulären Infusion	Procedures: Neurosurgical procedures: Other procedures on skull, brain and meninges: Functional interventions on skull, brain and meninges: Removal of an intracranial catheter for intraventricular infusion	equal		4231505	Stereotactic insertion of intracerebral infusion catheter	439305006	4047019	Removal of intracranial pressure catheter	230950007	184486	208354999	wider
4	T	oui	4	Z03.01	Entfernen eines Fremdkörpers vom Spinalkanal	Removal of a foreign body from the spinal canal	2265	5-033.4	operationen: Operationen am Nervensystem: Operationen an Rückenmark, Rückenmarkhäuten und Spinalkanal: Inzision des Spinalkanals: Entfernung eines Fremdkörpers aus dem Epiduralraum	Surgeries: Neurosurgeries: Surgeries on spinal cord, dura mater and spinal canal: Incision of the spinal canal: Removal of a foreign body from the epidural space	equal		4206775	Removal of foreign body from spinal canal	56223007	4154754	Removal of foreign body from spinal cord	28405008	52021	27817999	equivalent
6	T	oui	6	Z03.03.09	Laminotomie, Laminektomie und Laminoplastik, sonstige	Laminectomy, laminoplasty, and lamino-plasty, other	2246	5-032.4	operationen: Operationen am Nervensystem: Operationen an Rückenmark, Rückenmarkhäuten und Spinalkanal: Zugang zur Lendenwirbelsäule, zum Os sacrum und zum Os coccygis: Laminektomie Lendenwirbelsäule	Surgeries: Neurosurgeries: Surgeries on spinal cord, meninges and spinal canal: Access to lumbar spine, sacrum and coccyx: Lumbar laminectomy	inexact		4306206	Laminectomy	387731002	4222919	Radiography of sacrococcygeal spine	8449009	83287	379281993	inexact
6	T	oui	6	Z03.05.23	Inzision des Rückenmarks und der Rückenmarkhäute zur Entleerung eines intramedullären Hämatoms oder Abszesses	Incision of the spinal cord and dura mater to evacuate an intramedullary hematoma or abscess	2273	5-034.4	operationen: Operationen am Nervensystem: Operationen an Rückenmark, Rückenmarkhäuten und Spinalkanal: Inzision von Rückenmark und Rückenmarkhäuten: Entleerung eines intramedullären Hämatoms	Surgeries: Surgeries on the nervous system: Surgeries on spinal cord, meninges and spinal canal: Incision of spinal cord and meninges: Drainage of an intramedullary hematoma	equal		4332704	Evacuation of spinal intradural extramedullary abscess	230994001	4148636	Incision of nervous system	30617006	184068	200376995	wider
6	T	oui	6	Z03.59.13	Sonstige plastische Rekonstruktion und Operationen an Strukturen des Spinalkanals, Spinale Duraplastik	Other plastic reconstructions and operations on structures of the spinal canal, spinal dural plasty	2299	5-036.8	operationen: Operationen am Nervensystem: Operationen an Rückenmark, Rückenmarkhäuten und Spinalkanal: Plastische Operationen an Rückenmark und Rückenmarkhäuten: Spinale Duraplastik	Surgeries: Neurosurgeries: Surgeries on spinal cord, meninges and spinal canal: Plastic surgeries on spinal cord and meninges: Spinal dural plasty	equal		4311038	Operative procedure on spinal structure	392236004	4315020	Injection of spinal neurolytic agent	86912009	-3982	305323995	narrower
6	T	oui	6	Z04.01.11	Exzision eines Akustikusneurinoms, translabyrinthärer Zugang	Excision of an acoustic neuroma, translabyrinthine approach	1855	5-011.9	operationen: Operationen am Nervensystem: Inzision (Trepanation), Exzision und Destruktion an Schädel, Gehirn und Hirnhäuten: Zugang durch die Schädelbasis: Translabyrinthär	Surgeries on the nervous system: Incision (trepanation), excision and destruction of skull, brain and meninges: Access through the cranial base: translabyrinthine	equal		40488438	Excision of rectum by transanal approach	448156002	4148636	Incision of nervous system	30617006	36339802	417538996	inexact
6	T	oui	6	Z04.11.40	Geschlossene [perkutane] [Nadel-] Biopsie an Nerven der unteren Extremität	Closed [percutaneous] [needle]-biopsy of nerves in the lower extremity	249	1-405.8	diagnostische massnahmen: Biopsie ohne Inzision: Biopsie ohne Inzision an Nervensystem und endokrinen Organen: Perkutane (Nadel-)Biopsie an peripheren Nerven: Nerven Bein	Diagnostic measures: Needle biopsy: Needle biopsy of the nervous system and endocrine organs: Percutaneous (needle) biopsy of peripheral nerves: Nerve leg	equal		4194434	Percutaneous needle biopsy of nerve	39530009	4194434	Percutaneous needle biopsy of nerve	39530009	0	0	equal
6	T	oui	6	Z04.3X.22	Epineurale Naht von Nerven der Schulter, sekundär	Epineural suture of shoulder nerves, secondary	2466	5-046.2	operationen: Operationen am Nervensystem: Operationen an Nerven und Nervenganglien: Epineurale Naht eines Nerven und Nervenplexus, sekundär: Nerven Schulter	Surgeries: Neurosurgeries: Surgeries on nerves and nerve ganglia: Secondary epineural suture of a nerve and plexus, shoulder nerve	equal		4120993	Secondary suture of skin	302412004	40492769	Suturing of nerve plexus	445843006	-36371776	-143431002	inexact
6	T	oui	6	Z04.49.14	Sonstige Dekompression oder Lösung von Adhäsionen am Plexus lumbosacralis, Leiste und Beckenboden	Other decompression or lysis of adhesions at the lumbosacral plexus, groin, and pelvic floor	2622	5-056.7	operationen: Operationen am Nervensystem: Andere Operationen an Nerven und Nervenganglien: Neurolyse und Dekompression eines Nerven: Nerven Leiste und Beckenboden	Procedures: Procedures on the nervous system: Other procedures on nerves and nerve ganglia: Nerve neurolysis and decompression: Nerve groin and pelvic floor	equal		4245629	Lysis of pelvic adhesions	60758002	4043019	Procedure on nervous system	118678004	202610	-57920002	inexact
6	T	oui	6	Z04.6X.73	Transposition mit Neurolyse und Dekompression eines Nerven der Hand	Transposition with neurolysis and decompression of a hand nerve	2632	5-057.4	operationen: Operationen am Nervensystem: Andere Operationen an Nerven und Nervenganglien: Neurolyse und Dekompression eines Nerven mit Transposition: Nerven Hand	Surgeries: Neurosurgeries: Other surgeries on nerves and nerve ganglia: Nerve neurolysis and decompression with transposition: Hand nerve	equal		4064113	Secondary neurolysis and transposition of peripheral nerve	171856003	4031052	Nerve ganglion decompression	14327008	33061	157528995	wider
4	T	oui	4	Z05.23	Lumbale Sympathektomie	Lumbar sympathectomy	2434	5-043.2	operationen: Operationen am Nervensystem: Operationen an Nerven und Nervenganglien: Sympathektomie: Lumbosakral	Procedures: Procedures on the nervous system: Operations on nerves and nerve ganglia: Sympathectomy: Lumbar-sacral	equal		4249457	Lumbar sympathectomy	72910005	4041193	Operation on nervous system	16545005	208264	56365000	wider
6	T	oui	6	Z06.6X.12	Exzision einer Thyreoidea lingualis, transzervikal, mit Resektion des medialen Zungenbeines	Excision of a lingual thyroid, transcervical, with resection of the medial tongue base	2806	5-069.21	operationen: Operationen an endokrinen Drüsen: Operationen an Schilddrüse und Nebenschilddrüse: Andere Operationen an Schilddrüse und Nebenschilddrüsen: Exzision einer Zungengrundschilddrüse: Transzervikal, ohne Resektion des medialen Zungenbeines	operations: Endocrine gland surgeries: Thyroid and parathyroid surgeries: Other thyroid and parathyroid surgeries: Excision of a lingual thyroid: Transcervical, without resection of the medial tongue base	inexact	hyoid bone	4200095	Excision of lingual thyroid	52814001	4200418	Parathyroidectomy	53304009	-323	-490008	wider
6	T	oui	6	Z06.95.12	Vollständige Parathyreoidektomie, mit Replantation heterotop	Total parathyroidectomy with heterotopic replantation	2811	5-069.31	operationen: Operationen an endokrinen Drüsen: Operationen an Schilddrüse und Nebenschilddrüse: Andere Operationen an Schilddrüse und Nebenschilddrüsen: Replantation einer Nebenschilddrüse: Heterotop (z.B. Oberarm)	operations: Operations on endocrine glands: Operations on the thyroid and parathyroid glands: Other operations on the thyroid and parathyroid glands: Parathyroid gland replantation: Heterotopic (e.g., upper arm)	equal		4047947	Complete parathyroidectomy	12330002	4185578	Operation on parathyroid gland	43882005	-137631	-31552003	wider
6	T	oui	6	Z07.13.12	Stereotaktische Biopsie an der Hypophyse durch transfrontalen Zugang	Stereotactic biopsy of the pituitary gland via a transsphenoidal approach	769	1-515.0	diagnostische massnahmen: Biopsie durch Inzision: Biopsie an Nervengewebe, Hypophyse, Corpus pineale durch Inzision und Trepanation von Schädelknochen: Stereotaktische Biopsie an Hypophyse und Corpus pineale: Hypophyse	Diagnostic measures: Incisional biopsy: Biopsy of nerve tissue, pituitary gland, pineal body through incision and trepanation of skull bone: Stereotactic biopsy of the pituitary gland and pineal body: Pituitary gland	equal		4220696	Excisional biopsy of pituitary gland by transsphenoidal approach	82421004	4064127	Biopsy of lesion of pituitary gland	171958003	156569	-89536999	wider
4	T	oui	4	Z07.94	Transplantation von Thymusgewebe	Transplantation of thymus tissue	2871	5-078.0	operationen: Operationen an endokrinen Drüsen: Operationen an anderen endokrinen Drüsen: Andere Operationen am Thymus: Transplantation	operations: Operations on endocrine glands: Operations on other endocrine glands: Other operations on the thymus: Transplantation	equal		4115319	Thymus transplantation	287239002	4003872	Endocrine gland transplantation	119943006	111447	167295996	wider
4	T	oui	4	Z08.35	Behebung einer Blepharoptose durch Tarsoplastik	Correction of blepharoptosis by tarsopexy	3009	5-094.0	operationen: Operationen an den Augen: Operationen an den Augenlidern: Korrekturoperation bei Blepharoptosis: Tarsusresektion	operations: Eye surgeries: Eyelid surgeries: Corrective surgery for blepharoptosis: Tarsal resection	equivalent		4321379	Repair of blepharoptosis	69769008	4321379	Repair of blepharoptosis	69769008	0	0	equal
6	T	oui	6	Z08.49.11	Sonstiger Eingriff zur Korrektur eines Entropiums oder Ektropiums, Reposition einer Lidlamelle	Other intervention for correction of entropion or ectropion, repositioning of a lid lamella	3005	5-093.6	operationen: Operationen an den Augen: Operationen an den Augenlidern: Korrekturoperation bei Entropium und Ektropium: Durch Reposition einer Lidlamelle	operations: Eye surgeries: Eyelid surgeries: Corrective surgery for entropion and ectropion: By repositioning a lid lamella	equal		4323685	Repair of ectropion	71408000	4335305	Anterior lamellar repositioning of upper eyelid	231613000	-11620	-160205000	narrower
6	T	oui	6	Z08.69.11	Plastische Rekonstruktion des Augenlids mit alloplastischem Material	Plastic reconstruction of the eyelid with alloplastic material	3041	5-096.24	operationen: Operationen an den Augen: Operationen an den Augenlidern: Andere Rekonstruktion der Augenlider: Durch Transplantation: Alloplastisches Material	operations: Eye surgeries: Eyelid surgeries: Other eyelid reconstructions: Through transplantation: Alloplastic material	equal		4286488	Reconstruction of eyelid with graft	68304009	4330850	Reconstruction of eyelid	2242005	-44362	66062004	wider
4	T	oui	4	Z09.43	Sondierung des Ductus nasolacrimalis	Dacryocystography	1075	1-681	diagnostische massnahmen: Diagnostische Endoskopie: Andere diagnostische Endoskopie: Diagnostische Endoskopie der Tränenwege	Diagnostic measures: Diagnostic endoscopy: Other diagnostic endoscopy: Diagnostic endoscopy of the lacrimal passages	inexact		4210310	Dacryocystography	56087001	44790228	Diagnostic endocrinology	230151000000100	-40579918	-230150943913099	inexact
6	T	oui	6	Z10.5X.10	Lösung von Adhäsionen an Konjunktiva und Augenlid mit Bindehautplastik	Adhesion lysis of conjunctiva and eyelid with conjunctival flap surgery	3183	5-114.1	operationen: Operationen an den Augen: Operationen an der Konjunktiva: Lösung von Adhäsionen zwischen Konjunktiva und Augenlid: Mit Bindehautplastik	Procedures: Eye surgeries: Conjunctiva surgeries: Adhesion lysis between conjunctiva and eyelid: With conjunctival flap	equivalent		4271438	Lysis of adhesions of conjunctiva	63120005	4271438	Lysis of adhesions of conjunctiva	63120005	0	0	equal
4	T	oui	4	Z11.72	Keratophakie	Keratopathy	3222	5-123.3	operationen: Operationen an den Augen: Operationen an der Kornea: Exzision und Destruktion von (erkranktem) Gewebe der Kornea: Phototherapeutische Keratektomie	operations: Eye surgeries: Corneal surgeries: Excision and destruction of (diseased) corneal tissue: Phototherapeutic keratectomy	inexact		4259556	Naturopathy	439809005	37153602	PTK - phototherapeutic keratectomy	1222582007	-32894046	-782773002	inexact
4	T	oui	4	Z13.01	Entfernen eines Fremdkörpers aus der Linse mittels Magnet	Removal of a foreign body from the lens using a magnet	3378	5-140.0	operationen: Operationen an den Augen: Operationen an der Linse: Entfernung eines Fremdkörpers aus der Augenlinse: Mit Magnet	Procedures: Eye surgeries: Lens surgeries: Removal of a foreign body from the eye lens: With magnet	equal		4239465	Magnet extraction of foreign body from lens	58689006	40480209	Removal of magnetic foreign body from eye	444600006	-36240744	-385911000	equivalent
4	T	oui	4	Z14.33	Versorgung eines Retinarisses durch Xenon-Bogen-Photokoagulation	Treatment of a retinal tear with xenon arc photocoagulation	3462	5-155.3	operationen: Operationen an den Augen: Operationen an Retina, Choroidea und Corpus vitreum: Destruktion von erkranktem Gewebe an Retina und Choroidea: Durch lokale Laserkoagulation	Procedures: Eye surgeries: Surgeries on retina, choroid, and vitreous body: Destruction of diseased tissue in the retina and choroid: By local laser coagulation	equal		4002094	Repair of retinal detachment with xenon arc photocoagulation	10006000	4215162	Destruction of lesion of choroid by laser photocoagulation	81177005	-213068	-71171005	equivalent
6	T	oui	6	Z14.71.10	Vordere Vitrektomie über Pars plana	Anterior vitrectomy through pars plana	3499	5-158.0	operationen: Operationen an den Augen: Operationen an Retina, Choroidea und Corpus vitreum: Pars-plana-Vitrektomie: Vordere Vitrektomie über Pars plana	operations: Eye surgeries: Surgeries on retina, choroid and vitreous body: Pars plana vitrectomy: Anterior vitrectomy via pars plana	equal		4314406	Mechanical vitrectomy by pars plana approach	87021001	4115481	Retinal, choroid and vitreous body operations	287402001	198925	-200381000	wider
6	T	oui	6	Z18.6X.30	Konstruktion eines (nicht bestehenden) äusseren Gehörgangs	Construction of an external auditory canal	3678	5-185	operationen: Operationen an den Ohren: Operationen an Ohrmuschel und äußerem Gehörgang: Konstruktion und Rekonstruktion des äußeren Gehörganges	Surgeries: Ear surgeries: Surgeries on the pinna and external auditory canal: Construction and reconstruction of the external auditory canal	equal		4139012	Reconstruction of external auditory canal	265303002	4139012	Reconstruction of external auditory canal	265303002	0	0	equal
4	T	oui	4	Z18.72	Reinsertion eines amputierten Ohres	Reimplantation of an amputated ear	3637	5-18...5-20	operationen: Operationen an den Ohren	Operations on the ears	equal		4151924	Reimplantation	3137001	4238720	Operation on the ear	68265005	-86796	-65128004	inexact
3	T	oui	3	Z19.0	Mobilisation des Stapes	Stapes mobilization	3839	5-209.e2	operationen: Operationen an den Ohren: Andere Operationen an Mittel- und Innenohr: Andere Operationen am Mittel- und Innenohr: Einführung eines aktiven mechanischen Hörimplantates: An den Steigbügel	Operations on the ears: Other operations on the middle and inner ear: Other operations on the middle and inner ear: Implantation of an active mechanical hearing implant: On the stirrup	equal		4318798	Stapes mobilization	22128006	4064533	Operative procedure on middle ear	21355007	254265	772999	wider
6	T	oui	6	Z19.29.11	Sonstige Revision einer Stapedotomie und Stapedektomie mit autogener Stapesprothese	Other revision of stapedectomy and stapectomy with autologous stapes prosthesis	3718	5-192.11	operationen: Operationen an den Ohren: Mikrochirurgische Operationen am Mittelohr: Revision einer Stapedektomie: Mit Wiedereröffnung des ovalen Fensters: Mit Implantation einer autogenen Prothese (z.B. nach Schuknecht)	operations: Ear surgeries: Microsurgical middle ear operations: Revision of stapedectomy: With re-opening of the oval window: With implantation of an autogenous prosthesis (e.g., according to Schuknecht)	inexact		4242489	Revision of stapedectomy	9225000	46270867	Revision of stapedectomy with incus replacement	708858006	-42028378	-699633006	narrower
6	T	oui	6	Z19.56.20	Tympanoplastik mit Anlage einer Ohrradikalhöhle (offene Kavität), ohne Implantation einer Prothese oder mit Implantation eines autogenen Ossikels	Tympanoplasty with creation of a radical ear cavity (open cavity), without implantation of a prosthesis or with implantation of an autologous ossicle	3748	5-195.c0	operationen: Operationen an den Ohren: Mikrochirurgische Operationen am Mittelohr: Tympanoplastik (Verschluss einer Trommelfellperforation und Rekonstruktion der Gehörknöchelchen): Tympanoplastik mit Anlage einer Ohrradikalhöhle: Ohne Implantation einer Prothese	Surgeries: Ear surgeries: Microsurgical middle ear surgery: Tympanoplasty (closure of a tympanic membrane perforation and reconstruction of the ossicles): Tympanoplasty with creation of an attic cavity: Without prosthesis implantation	equal		4229887	Reconstruction of ossicles with tympanoplasty	89393006	4129864	Closure of fistula of ear drum	1266002	100023	88127004	narrower
6	T	oui	6	Z20.09.10	Sonstige Myringotomie ohne Paukenröhrcheneinlage	Other myringotomy without tympanostomy tube insertion	3770	5-200.4	operationen: Operationen an den Ohren: Andere Operationen an Mittel- und Innenohr: Parazentese [Myringotomie]: Ohne Legen einer Paukendrainage	Surgeries: Ear surgeries: Other surgeries on the middle and inner ear: Myringotomy: Without placement of a tympanostomy tube	equal		4107670	Myringotomy and insertion of tympanic ventilation tube	284532000	4107670	Myringotomy and insertion of tympanic ventilation tube	284532000	0	0	equal
6	T	oui	6	Z20.23.13	Explorative Tympanotomie	Exploratory tympanotomy	3777	5-202.2	operationen: Operationen an den Ohren: Andere Operationen an Mittel- und Innenohr: Inzision an Warzenfortsatz und Mittelohr: Explorative Tympanotomie	Surgeries: Ear surgeries: Other surgeries on middle and inner ear: Incision at the promontory and middle ear: Exploratory tympanotomy	equal		4266016	Tympanotomy	397760009	4268341	Exploration of tympanic cavity by transtympanic route	63027006	-2325	334733003	narrower
6	T	oui	6	Z20.44.14	Mastoidektomie, subtotale Resektion des Felsenbeins [subtotale Petrosektomie], mit Obliteration von Fett- sowie Muskelgewebe	Mastoidectomy, subtotal resection of the temporal bone [subtotal petrosectomy], with obliteration of fat and muscle tissue	3787	5-203.9	operationen: Operationen an den Ohren: Andere Operationen an Mittel- und Innenohr: Mastoidektomie: Totale Resektion des Felsenbeins [Petrosektomie]	Surgeries: Ear surgeries: Other surgeries on middle and inner ear: Mastoidectomy: Total resection of the temporal bone [petrosectomy]	equal		4149281	Tympanoplasty with mastoidectomy, with ossicular chain reconstruction	31009008	40491906	Surgical procedure on middle and inner ear	447296009	-36342625	-416287001	wider
6	T	oui	6	Z20.72.11	Destruktion durch Injektion in das Innenohr	Destruction by injection into the inner ear	3637	5-18...5-20	operationen: Operationen an den Ohren	Operations on the ears	equal		4094369	Injection of inner ear for destruction	26059007	4238720	Operation on the ear	68265005	-144351	-42205998	wider
4	T	oui	4	Z20.97	Implantation oder Ersatz einer einkanaligen Kochleaprothese	Implantation or replacement of a single-channel Cook valve	2717	5-059.e	operationen: Operationen am Nervensystem: Andere Operationen an Nerven und Nervenganglien: Andere Operationen an Nerven und Ganglien: Isolierter Wechsel des Sensors in der rechten Herzkammer bei einem kardialen Vagusnervstimulationssystem	Isolated sensor replacement in the right ventricle for a cardiac vagus nerve stimulation system.	inexact		4336593	Replacement of implanted mitral valve	232777000	40482949	Insertion of vagal nerve stimulator	445319001	-36146356	-212542001	inexact
6	T	oui	6	Z21.4X.22	Resektion der Nase, subtotal	Partial resection of the nose	3885	5-213.0	operationen: Operationen an Nase und Nasennebenhöhlen: Operationen an der Nase: Resektion der Nase: Partiell	Surgeries: Surgeries on nose and paranasal sinuses: Nasal surgeries: Partial resection of the nose	equivalent		4181781	Partial resection of colon	43075005	4082875	CT of paranasal sinuses	241526005	98906	-198451000	inexact
6	T	oui	6	Z21.88.14	Septumplastik, Plastische Rekonstruktion des Nasenseptums, mit lokalen autogenen Transplantaten (Austauschplastik)	Septoplasty, plastic reconstruction of the nasal septum, with local autogenous grafts	3953	5-218.40	operationen: Operationen an Nase und Nasennebenhöhlen: Operationen an der Nase: Plastische Rekonstruktion der inneren und äußeren Nase [Septorhinoplastik]: Komplexe plastische Rekonstruktion der inneren und äußeren Nase: Mit lokalen autogenen Transplantaten	Surgeries: Surgeries of the nose and paranasal sinuses: Nose surgeries: Plastic reconstruction of the inner and outer nose (septorhinoplasty): Complex plastic reconstruction of the inner and outer nose: With local autogenous grafts.	equivalent		4201741	Nasal septoplasty with graft	53610001	4067485	Reconstruction of defect of nasal sinus with bone graft	172907002	134256	-119297001	narrower
6	T	oui	6	Z22.2X.23	Endonasale Nasennebenhöhlen-Eröffnung durch Ballondilatation, Sinus maxillaris	Endoscopic maxillary sinus opening via balloon dilation	4013	5-223.7	operationen: Operationen an Nase und Nasennebenhöhlen: Operationen an den Nasennebenhöhlen: Operationen an der Stirnhöhle: Ballondilatation des Eingangs der Stirnhöhle	Surgeries: Surgeries of the nose and paranasal sinuses: Paranasal sinus surgeries: Frontal sinus surgeries: Balloon dilation of the frontal sinus opening	inexact		4054619	Maxillary sinus endoscopy	126063004	4206994	Endoscopic balloon dilatation of ostium of paranasal sinus	439533007	-152375	-313470003	narrower
6	T	oui	6	Z22.41.11	Sinusotomie des Sinus frontalis, endonasal	Frontal sinus antrostomy, endonasal	4011	5-223.5	operationen: Operationen an Nase und Nasennebenhöhlen: Operationen an den Nasennebenhöhlen: Operationen an der Stirnhöhle: Endonasale Stirnhöhlenoperation	Surgeries: Surgeries on nose and paranasal sinuses: Paranasal sinus surgeries: Frontal sinus surgeries: Endoscopic frontal sinus surgery	equivalent		4069484	Radical frontal sinus antrostomy	172888008	37153238	Endoscopy of nose and nasal sinuses	1209099008	-33083754	-1036211000	inexact
3	T	oui	3	Z23.9	Zahnextraktion und Zahnsanierung, sonstige	Tooth extraction and dental sanitation, other	4060	5-230.x	operationen: Operationen an Mundhöhle und Gesicht: Entfernung und Wiederherstellung von Zähnen: Zahnextraktion: Sonstige	Procedures: Operations on oral cavity and face: Removal and restoration of teeth: Tooth extraction: Other	equal		4208393	Tooth extraction	55162003	4298484	Operation on oral cavity	384685001	-90091	-329522998	wider
3	T	oui	3	Z24.7	Anbringen einer orthodontischen Apparatur	Placement of an orthodontic appliance	4160	5-249.2	operationen: Operationen an Mundhöhle und Gesicht: Operationen an Zahnfleisch, Alveolen und Kiefer: Andere Operationen und Maßnahmen an Gebiss, Zahnfleisch und Alveolen: Operative Fixation eines kieferorthopädischen Gerätes	Procedures: Operations on oral cavity and face: Operations on gums, alveoli, and jawbone: Other operations and procedures on dentition, gums, and alveoli: Operative fixation of an orthodontic appliance	equal		46271068	Application of orthodontic appliance	709102008	46271068	Application of orthodontic appliance	709102008	0	0	equal
6	T	oui	6	Z24.91.99	Extension oder Vertiefung des Sulcus buccolabialis oder lingualis, sonstige	Extension or deepening of the buccal sulcus or lingual sulcus, other	4206	5-259.x	operationen: Operationen an Mundhöhle und Gesicht: Operationen an der Zunge: Andere Operationen an der Zunge: Sonstige	operations: Operations on oral cavity and face: Operations on the tongue: Other operations on the tongue: Miscellaneous	equal		4034121	Vestibuloplasty	11369006	4032923	Operation on tongue	14835004	1198	-3465998	wider
6	T	oui	6	Z25.2X.23	Partielle Glossektomie, transmandibulärer Zugang, Rekonstruktion mit myokutanem Lappen	Partial glossectomy, transmandibular approach, reconstruction with myocutaneous flap	4182	5-251	operationen: Operationen an Mundhöhle und Gesicht: Operationen an der Zunge: Partielle Glossektomie	Procedures: Operations on oral cavity and face: Tongue operations: Partial glossectomy	equal		4339302	Reconstruction of trunk using myocutaneous flap	88142004	4287693	Partial glossectomy	68769000	51609	19373004	inexact
4	T	oui	4	Z25.91	Linguale Frenulotomie	Lingual frenulotomy	4204	5-259.1	operationen: Operationen an Mundhöhle und Gesicht: Operationen an der Zunge: Andere Operationen an der Zunge: Durchtrennung des Frenulum linguae	operations: Operations on oral cavity and face: Operations on the tongue: Other operations on the tongue: Frenectomy	equal		4320774	Incision of lingual frenum	7001008	4032923	Operation on tongue	14835004	287851	-7833996	wider
6	T	oui	6	Z26.0X.10	Inzision an Speicheldrüse oder -gang, mit Steinentfernung	Incision of salivary gland or duct, with stone removal	4215	5-260.2	operationen: Operationen an Mundhöhle und Gesicht: Operationen an Speicheldrüsen und Speicheldrüsenausführungsgängen: Inzision und Schlitzung einer Speicheldrüse und eines Speicheldrüsenausführungsganges: Entfernung eines Speichelsteines	operations: Operations on the oral cavity and face: Operations on salivary glands and salivary duct systems: Incision and incision of a salivary gland and salivary duct: Removal of a salivary stone	equal		4295736	Incision of salivary gland	7647001	4295736	Incision of salivary gland	7647001	0	0	equal
6	T	oui	6	Z26.31.11	Partielle Parotidektomie mit intraoperatives Fazialismonitoring	Partial parotidectomy with intraoperative facial nerve monitoring	4235	5-262.04	operationen: Operationen an Mundhöhle und Gesicht: Operationen an Speicheldrüsen und Speicheldrüsenausführungsgängen: Resektion einer Speicheldrüse: Parotidektomie, partiell: Mit intraoperativem Fazialismonitoring, ohne Entfernung von erkranktem Gewebe im oberen Parapharyngeal- und/oder Infratemporalraum	Operations on oral cavity and face: Operations on salivary glands and salivary gland ducts: Resection of a salivary gland: Partial parotidectomy: With intraoperative facial nerve monitoring, without removal of diseased tissue in the upper parapharyngeal and/or infratemporal space	equal		4218315	Trabeculectomy with intraoperative application of mitomycin	416968006	40492899	Destruction of glossophyaryngeal nerve by infratentorial approach	447520005	-36274584	-30551999	inexact
6	T	oui	6	Z27.22.20	Offene Biopsie (mit Inzision) an Uvula und weichem Gaumen	Open biopsy of uvula and soft palate	308	1-422.00	diagnostische massnahmen: Biopsie ohne Inzision: Biopsie ohne Inzision an Mund, Mundhöhle, Larynx, Pharynx und blutbildenden Organen: Biopsie ohne Inzision am Pharynx: Oropharynx: Uvula	Diagnostic measures: Biopsy without incision: Biopsy without incision of mouth, oral cavity, larynx, pharynx and blood-forming organs: Biopsy without incision of the pharynx: Oropharynx: Uvula	equal		4188622	Biopsy of uvula and soft palate	47298009	4221390	Incisional biopsy of larynx	82658005	-32768	-35359996	inexact
6	T	oui	6	Z27.32.11	Radikale transmandibuläre Exzision [En-bloc-Resektion] von Läsion oder Gewebe am knöchernen Gaumen	Radical transmandibular excision [en bloc resection] of lesion or tissue on the bony palate	4308	5-272.3	operationen: Operationen an Mundhöhle und Gesicht: Andere Operationen an Mund und Gesicht: Exzision und Destruktion des (erkrankten) harten und weichen Gaumens: Exzision, radikal [En-bloc-Resektion], transmandibulär	Surgeries of the oral cavity and face: Other surgeries of the mouth and face: Excision and destruction of the (diseased) hard and soft palate: Excision, radical [en bloc resection], transmandibular	equal		4016092	Excision of lesion of patella	104001	4211977	Radical excision with en bloc resection of regional organs and tissues	57434002	-195885	-57330001	inexact
6	T	oui	6	Z27.56.40	Grossflächig heterologe Hauttransplantation an die Lippe	Large-area heterologous skin graft to the lip	11879	5-908	operationen: Operationen an Haut und Unterhaut: Operative Wiederherstellung und Rekonstruktion von Haut und Unterhaut: Plastische Operation an Lippe und Mundwinkel	operations: Operations on skin and subcutaneous tissue: Surgical restoration and reconstruction of skin and subcutaneous tissue: Plastic surgery on lip and corner of the mouth	equal		4046023	Xenograft of skin to skin	12365002	4329163	Reconstruction of subcutaneous tissue without skin graft	22328000	-283140	-9962998	inexact
6	T	oui	6	Z27.59.31	Grossflächige temporäre Weichteildeckung durch Kombination mehrerer Verfahren an der Lippe	Large-area temporary soft tissue coverage of the lip using a combination of procedures	11940	5-916	operationen: Operationen an Haut und Unterhaut: Andere Operationen an Haut und Unterhaut: Temporäre Weichteildeckung	operations: Operations on skin and subcutaneous tissue: Other operations on skin and subcutaneous tissue: Temporary soft tissue coverage	equal		4078579	Intra-articular soft tissue procedure for congenital dislocation of the hip	180106007	4167079	Subcutaneous tissue operation	274066005	-88500	-93959998	inexact
6	T	oui	6	Z28.2X.12	Abszesstonsillektomie	Tonsillectomy	4397	5-281.0	operationen: Operationen an Mundhöhle und Gesicht: Operationen im Bereich des Naso- und Oropharynx: Tonsillektomie (ohne Adenotomie): Mit Dissektionstechnik	Surgeries: Surgeries of the oral cavity and face: Surgeries in the area of the nasopharynx and oropharynx: Tonsillectomy (without adenotomy): With dissection technique	wider		4070719	Tonsillectomy	173422009	4070721	Dissection tonsillectomy and adenoidectomy	173430005	-2	-7996	narrower
6	T	oui	6	Z29.4X.11	Plastische Rekonstruktion am Pharynx, mit gestieltem myokutanen Lappen	Pharyngeal plastic reconstruction with pedicled myocutaneous flap	4464	5-293.1	operationen: Operationen an Pharynx, Larynx und Trachea: Operationen am Pharynx: Pharyngoplastik: Mit gestieltem myokutanen Lappen	Procedures: Operations on the pharynx, larynx and trachea: Procedures on the pharynx: Pharyngoplasty: With pedicled myocutaneous flap	equal		4126165	Reconstruction using local subcutaneous pedicle myocutaneous flap	304094008	37152466	Pedicle myocutaneous flap to hand	1186995001	-33026301	-882900993	narrower
6	T	oui	6	Z30.29.22	Partielle Laryngektomie frontolaterale (Leroux-Robert)	Partial laryngectomy, frontolateral approach	4535	5-302.7	operationen: Operationen an Pharynx, Larynx und Trachea: Exzision und Resektion am Larynx: Andere partielle Laryngektomie: Teilresektion, frontolateral (Leroux-Robert)	Operations on pharynx, larynx and trachea: Excision and resection of the larynx: Other partial laryngectomy: Partial resection, frontolateral (Leroux-Robert)	equal		4163548	Partial laterovertical laryngectomy	45523007	4163548	Partial laterovertical laryngectomy	45523007	0	0	equal
4	T	oui	4	Z31.61	Naht einer Rissverletzung am Larynx	Laryngeal laceration repair	4601	5-315.0	operationen: Operationen an Pharynx, Larynx und Trachea: Andere Larynxoperationen und Operationen an der Trachea: Rekonstruktion des Larynx: Naht (nach Verletzung)	Procedures: Operations on pharynx, larynx and trachea: Other laryngeal operations and tracheal operations: Larynx reconstruction: Suture (after injury)	wider		4321405	Repair of pharynx	69888009	4002394	Larynx reconstruction	119727006	319011	-49838997	inexact
4	T	oui	4	Z31.94	Injektion eines Lokaltherapeutikums in die Trachea	Injection of a local anesthetic into the trachea	4653	5-319.b	operationen: Operationen an Pharynx, Larynx und Trachea: Andere Larynxoperationen und Operationen an der Trachea: Andere Operationen an Larynx und Trachea: Endoskopische Injektion in die Trachea	Procedures: Operations on pharynx, larynx and trachea: Other laryngeal operations and tracheal operations: Other operations on larynx and trachea: Endoscopic injection into the trachea	equal		4335028	Injection of local anesthetic into joint	231272007	4070143	Microtherapeutic endoscopic operations on larynx	173018005	264885	58254002	inexact
6	T	oui	6	Z32.01.13	Endoskopische Exzision oder Destruktion von Läsion oder Gewebe an einem Bronchus, Thermoplastie der Bronchialmuskulatur	Endoscopic excision or destruction of a lesion or tissue on a bronchus, thermoplasty of the bronchial musculature	4668	5-320.5	operationen: Operationen an Lunge und Bronchus: Exzision und Resektion an Lunge und Bronchus: Exzision und Destruktion von erkranktem Gewebe eines Bronchus: Bronchoskopische Radiofrequenzablation an der Bronchialmuskulatur	Surgeries on lung and bronchus: Excision and resection of lung and bronchus: Excision and destruction of diseased bronchial tissue: Bronchoscopic radiofrequency ablation of the bronchial musculature	equal		43531474	Endoscopic excision of tissue of anus	609191008	4141808	Endoscopic radiofrequency ablation of lesion of prostate	427118006	39389666	182073002	inexact
6	T	oui	6	Z32.44.12	Bilobektomie an der Lunge, thorakoskopisch, mit bronchoplastischer Erweiterung	Bilobectomy of the lung, thoracoscopically, with bronchial plastic reconstruction	4872	5-325.6	operationen: Operationen an Lunge und Bronchus: Exzision und Resektion an Lunge und Bronchus: Erweiterte Lobektomie und Bilobektomie der Lunge: Bilobektomie mit bronchoplastischer Erweiterung (Bronchusmanschette)	Operations on lung and bronchus: Excision and resection of lung and bronchus: Extended lobectomy and bilobectomy of the lung: Bilobectomy with bronchial plastic expansion (bronchial cuff)	equal		4328240	Thoracoscopic lobectomy of lung	75935006	4337605	Lobectomy with bronchoplastic procedure	232640003	-9365	-156704997	narrower
3	T	oui	3	Z33.0	Inzision an einem Bronchus	Incision on a bronchus	4946	5-330	operationen: Operationen an Lunge und Bronchus: Andere Operationen an Lunge und Bronchus: Inzision eines Bronchus	Procedures: Lung and Bronchus Surgeries: Other Lung and Bronchus Surgeries: Bronchial Incision	equal		4169736	Incision of bronchus	49045006	4169736	Incision of bronchus	49045006	0	0	equal
6	T	oui	6	Z33.23.13	Fluoreszenztracheobronchoskopie	Fluorescence bronchoscopy	967	1-620.2	diagnostische massnahmen: Diagnostische Endoskopie: Diagnostische Tracheobronchoskopie: Diagnostische Tracheobronchoskopie: Mit Autofluoreszenzlicht	Diagnostic measures: Diagnostic endoscopy: Diagnostic tracheobronchoscopy: Diagnostic tracheobronchoscopy: With autofluorescence light	equal		40488457	Autofluorescence bronchoscopy	448173000	40488457	Autofluorescence bronchoscopy	448173000	0	0	equal
6	T	oui	6	Z33.71.11	Endoskopisches Einsetzen von Bronchialventil(en), ein Ventil	Endoscopic placement of a bronchial valve, a valve	5012	5-339.52	operationen: Operationen an Lunge und Bronchus: Andere Operationen an Lunge und Bronchus: Andere Operationen an Lunge und Bronchien: Implantation oder Wechsel eines endobronchialen Klappensystems, endoskopisch: 3 Ventile	Surgeries on Lung and Bronchus: Other Surgeries on Lung and Bronchus: Other Surgeries on Lung and Bronchi: Implantation or replacement of an endobronchial valve system, endoscopic: 3 valves	equal		4336914	Bronchoscopic placement of stent	232602001	42537380	Bronchoscopic insertion of endobronchial valve	736748006	-38200466	-504146005	equivalent
6	T	oui	6	Z33.79.11	Endoskopisches Einsetzen von Gel zur biologischen Lungenvolumenreduktion	Endoscopic placement of gel for biological lung volume reduction	5027	5-339.7	operationen: Operationen an Lunge und Bronchus: Andere Operationen an Lunge und Bronchus: Andere Operationen an Lunge und Bronchien: Einführung von polymerisierendem Hydrogelschaum, bronchoskopisch	Surgeries on Lung and Bronchus: Other Surgeries on Lung and Bronchus: Other Surgeries on Lung and Bronchi: Introduction of Polymerizing Hydrogel Foam, Bronchoscopically	equal		44782581	Bronchoscopic lung volume reduction	698009006	44782581	Bronchoscopic lung volume reduction	698009006	0	0	equal
6	T	oui	6	Z34.01.10	Inzision an der Brustwand, Thorakotomie zur Fremdkörperentfernung	Incision on the chest wall, thoracotomy for foreign body removal	5057	5-340.2	operationen: Operationen an Lunge und Bronchus: Operationen an Brustwand, Pleura, Mediastinum und Zwerchfell: Inzision von Brustwand und Pleura: Thorakotomie zur Fremdkörperentfernung	Surgeries: Lung and bronchus surgeries: Surgeries on chest wall, pleura, mediastinum, and diaphragm: Incision of the chest wall and pleura: Thoracotomy for foreign body removal	equal		4228819	Removal of foreign body from intestine by incision	88354009	4211396	Major thoracotomy with removal of intrapulmonary foreign body	56897006	17423	31457003	inexact
6	T	oui	6	Z34.3X.24	Resektion von Läsion oder Gewebe des Mediastinums, mit prothetischem Gefässersatz	Resection of lesion or tissue of the mediastinum, with prosthetic vascular graft	5095	5-342.14	operationen: Operationen an Lunge und Bronchus: Operationen an Brustwand, Pleura, Mediastinum und Zwerchfell: Exzision und Destruktion von erkranktem Gewebe des Mediastinums: Resektion: Mit prothetischem Gefäßersatz	operations: Operations on lung and bronchus: Operations on chest wall, pleura, mediastinum, and diaphragm: Excision and destruction of diseased mediastinal tissue: Resection: With prosthetic vascular graft	equal		4204846	Implantation of tissue mandril for vascular graft	53666001	4138599	Chest wall, pleura and diaphragm operations	264948001	66247	-211282000	wider
6	T	oui	6	Z34.52.16	Subtotale Pleurektomie und Dekortikation, thorakoskopisch	Subtotal pleurectomy and decortication, thoracoscopically	5138	5-345.4	operationen: Operationen an Lunge und Bronchus: Operationen an Brustwand, Pleura, Mediastinum und Zwerchfell: Pleurodese [Verödung des Pleuraspaltes]: Mit Dekortikation, thorakoskopisch	Surgeries: Lung and bronchus surgeries: Surgeries on chest wall, pleura, mediastinum, and diaphragm: Pleurisy [sealing of the pleural space]: With decortication, thoracoscopically	equal		44807801	Laparoscopically assisted subtotal colectomy	827041000000107	4138599	Chest wall, pleura and diaphragm operations	264948001	40669202	827040735052106	inexact
4	T	oui	4	Z35.31	Papillarmuskeloperation	Papillary muscle operation	3082	5-10	operationen: Operationen an den Augen: Operationen an den Augenmuskeln	Procedures: Eye surgeries: Eye muscle surgeries	equal		4030876	Operation on papillary muscle of heart	1411001	4334575	Plication of eye muscle	231700004	-303699	-230289003	inexact
6	T	oui	6	Z35.41.20	Vergrösserung eines bestehenden Vorhofseptumdefekts, perkutan-transluminal	Enlargement of an existing atrial septal defect, percutaneous transluminal	17118	8-837.c0	nicht operative therapeutische massnahmen: Maßnahmen für den Blutkreislauf: Therapeutische Katheterisierung und Kanüleneinlage in Gefäße: Perkutan-transluminale Gefäßintervention an Herz und Koronargefäßen: Vergrößerung eines Septumdefektes: Vorhofseptum	Non-operative therapeutic measures: Measures for the circulatory system: Therapeutic catheterization and cannulation into vessels: Percutaneous transluminal intervention of heart and coronary arteries: Enlargement of a septal defect: Atrial septum	equal		4019944	Open enlargement of atrial septal defect	174866007	44806571	Percutaneous transluminal closure of defect of interventricular septum	792361000000103	-40786627	-792360825134096	inexact
4	T	oui	4	Z35.54	Korrektur von Endokardkissendefekten (AV-Kanal) mit Prothese	Repair of endocardial defects with prosthesis	5241	5-352	operationen: Operationen am Herzen: Operationen an Klappen und Septen des Herzens und herznaher Gefäße: Wechsel von Herzklappenprothesen	Procedures: Cardiac surgeries: Surgeries on valves and septa of the heart and nearby blood vessels: Replacement of heart valve prostheses	equal		37158842	Repair of defect of atrioventricular septum with prosthesis	1279572008	4145884	Prosthetic replacement of heart valve	307279007	33012958	972293001	inexact
6	T	oui	6	Z35.C4.11	Segelrekonstruktion der Trikuspidalklappe über vollständige Sternotomie	Reconstruction of the tricuspid valve via full sternotomy	5376	5-35a.5	operationen: Operationen am Herzen: Operationen an Klappen und Septen des Herzens und herznaher Gefäße: Minimalinvasive Operationen an Herzklappen: Endovaskuläre Trikuspidalklappenrekonstruktion	Procedures: Cardiac surgeries: Surgeries on valves and septa of the heart and nearby blood vessels: Minimally invasive heart valve surgeries: Endovascular tricuspid valve reconstruction	wider		4339733	Tricuspid valvectomy	232811004	4000891	Heart valve reconstruction	119769005	338842	113041999	wider
6	T	oui	6	Z35.F1.51	Aortenklappenersatz durch mechanische Prothese, über vollständige Sternotomie	Aortic valve replacement with a mechanical prosthesis, via full sternotomy	5236	5-351.2	operationen: Operationen am Herzen: Operationen an Klappen und Septen des Herzens und herznaher Gefäße: Ersatz von Herzklappen durch Prothese: Mitralklappe, thorakoskopisch	Procedures: Cardiac surgeries: Surgeries on valves and septa of the heart and nearby blood vessels: Replacement of heart valves with prostheses: Mitral valve, thoracoscopically	equal		4018561	Mechanical prosthetic aortic valve replacement	174929002	4145884	Prosthetic replacement of heart valve	307279007	-127323	-132350005	wider
6	T	oui	6	Z36.03.00	Koronarangioplastik am offenen Thorax, n.n.bez.	Open-chest coronary angioplasty, indication unspecified	5446	5-363.y	operationen: Operationen am Herzen: Operationen an den Koronargefäßen: Andere Revaskularisation des Herzens: Nicht näher bezeichnet	operations: Cardiac surgeries: Coronary artery bypass grafting: Other cardiac revascularization: Not specified	equal		4184832	Coronary angioplasty	41339005	4336464	Coronary artery bypass graft	232717009	-151632	-191378004	equivalent
6	T	oui	6	Z36.08.24	Implantation perkutan-transluminal von selbstexpandierenden Stents mit Medikamentenfreisetzung, in mehreren Koronararterien	Percutaneous transluminal implantation of drug-eluting self-expanding stents in multiple coronary arteries	17526	8-83d.24	nicht operative therapeutische massnahmen: Maßnahmen für den Blutkreislauf: Therapeutische Katheterisierung und Kanüleneinlage in Gefäße: Andere perkutan-transluminale Gefäßintervention an Herz und Koronargefäßen: Einlegen eines medikamentefreisetzenden selbstexpandierenden Stents: 3 selbstexpandierende Stents in mehrere Koronararterien	Non-operative therapeutic measures: Measures for the circulatory system: Therapeutic catheterization and cannulation into vessels: Other percutaneous transluminal interventions on heart and coronary arteries: Implantation of a drug-eluting self-expanding stent: 3 self-expanding stents in multiple coronary arteries	equal		4225903	Percutaneous transluminal coronary angioplasty, multiple vessels	85053006	4225903	Percutaneous transluminal coronary angioplasty, multiple vessels	85053006	0	0	equal
6	T	oui	6	Z36.11.31	Einfacher (aorto)koronarer Bypass, minimalinvasiv, mit autogener Arterie, A. radialis	Simple coronary bypass, minimally invasive, with autologous artery, radial artery	5417	5-362.0	operationen: Operationen am Herzen: Operationen an den Koronargefäßen: Anlegen eines aortokoronaren Bypass durch minimalinvasive Technik: Bypass einfach, durch Sternotomie	Procedures: Cardiac surgeries: Coronary artery bypass grafting: Aortic coronary bypass using minimally invasive technique: Bypass via simple sternotomy	equal		4168831	Minimally invasive direct coronary artery bypass	419132001	4168831	Minimally invasive direct coronary artery bypass	419132001	0	0	equal
4	T	oui	4	Z36.91	Korrektur eines Koronargefäss-Aneurysmas	Correction of a coronary artery aneurysm	5460	5-369.1	operationen: Operationen am Herzen: Operationen an den Koronargefäßen: Andere Operationen an den Koronargefäßen: Korrektur eines Aneurysmas	Procedures: Cardiac surgeries: Coronary artery bypass grafting: Other coronary artery procedures: Aneurysm repair	equal		4279918	Excision of aneurysm of coronary artery	65861005	4336464	Coronary artery bypass graft	232717009	-56546	-166856004	inexact
4	T	oui	4	Z37.21	Rechtsherzkatheter	Right heart catheter	131	1-273	diagnostische massnahmen: Untersuchung einzelner Körpersysteme: Diagnostische Katheteruntersuchung an Herz und Kreislauf: Rechtsherz-Katheteruntersuchung	Diagnostic measures: Examination of individual body systems: Diagnostic catheter examination of heart and circulatory system: Right heart catheterization	equal		4223626	Catheterization of right heart	40403005	4223626	Catheterization of right heart	40403005	0	0	equal
6	T	oui	6	Z37.24.20	Offene Perikardbiopsie	Open pericardiocentesis	1182	1-842	diagnostische massnahmen: Explorative diagnostische Maßnahmen: Diagnostische Punktion und Aspiration: Diagnostische Punktion des Perikardes [Perikardiozentese]	Diagnostic measures: Exploratory diagnostic measures: Diagnostic puncture and aspiration: Diagnostic puncture of the pericardium [pericardiocentesis]	inexact		4149930	Pericardiocentesis	309849004	4116896	Diagnostic puncture and aspiration	287529009	33034	22319995	equivalent
6	T	oui	6	Z37.27.11	Herz-Mapping mit Hilfe eines Multielektroden-Mapping-Katheters mit automatisierter Signalerfassung	Heart mapping using a multielectrode mapping catheter with automated signal acquisition	120	1-268	diagnostische massnahmen: Untersuchung einzelner Körpersysteme: Untersuchungen der elektrophysiologischen Aktivität des Herzens: Kardiales Mapping	Diagnostic measures: Examination of individual body systems: Examinations of the electrophysiological activity of the heart: Cardiac mapping	equivalent		4223321	Multiple gated acquisition scanning	404221001	4134565	Hearing examination	398171003	88756	6049998	inexact
6	T	oui	6	Z37.51.10	Herztransplantation	Heart transplantation	5543	5-375	operationen: Operationen am Herzen: Rhythmuschirurgie und andere Operationen an Herz und Perikard: Herz- und Herz-Lungen-Transplantation	Procedures: Cardiac surgery: Arrhythmia surgery and other operations on the heart and pericardium: Heart and heart-lung transplantation	equal		4137127	Transplantation of heart	32413006	4049091	Transection operation for arrhythmia	233155004	88036	-200741998	inexact
6	T	oui	6	Z37.69.1H	Dauer der Behandlung mit einer intraaortalen Ballonpumpe, von mehr als 432 Stunden bis 480 Stunden	Duration of treatment with an intra-aortic balloon pump, from more than 432 hours to 480 hours	17255	8-83a.01	nicht operative therapeutische massnahmen: Maßnahmen für den Blutkreislauf: Therapeutische Katheterisierung und Kanüleneinlage in Gefäße: Dauer der Behandlung mit einem herzunterstützenden System: Intraaortale Ballonpumpe: 48 bis unter 96 Stunden	Non-operative therapeutic measures: Measures for the circulatory system: Therapeutic catheterization and cannulation of vessels: Duration of treatment with a supportive system: Intra-aortic balloon pump: 48 to less than 96 hours	equal		4060257	Insertion of intra-aortic balloon counterpulsation	16965008	4160456	Intra-aortic balloon catheter operation	399175004	-100199	-382209996	equivalent
6	T	oui	6	Z37.69.81	Dauer der Behandlung mit einem herzkreislauf- und lungenunterstützenden System, mit Pumpe, mit Oxygenator (inkl. CO2-removal), extrakorporal, veno-venös, von mehr als 24 Stunden bis 48 Stunden	Duration of treatment with a cardiopulmonary support system, with pump, oxygenator, extracorporeal, veno-venous, from more than 24 hours to 48 hours.	17298	8-83a.46	nicht operative therapeutische massnahmen: Maßnahmen für den Blutkreislauf: Therapeutische Katheterisierung und Kanüleneinlage in Gefäße: Dauer der Behandlung mit einem herzunterstützenden System: Parakorporale Pumpe zur Kreislaufunterstützung (z.B. Membranpumpe): 288 bis unter 384 Stunden	Non-operative therapeutic measures: Measures for the circulatory system: Therapeutic catheterization and cannulation into vessels: Duration of treatment with a supportive system: Extracorporeal pump for circulatory support (e.g., membrane pump): 288 to less than 384 hours	equal		37206602	Arteriovenous extracorporeal membrane oxygenation	786452006	4233428	Insertion of vascular cannula for prolonged extracorporeal circulation	440001000	32973174	346451006	narrower
6	T	oui	6	Z37.75.32	Revision ohne Ersatz einer transvenösen Vorhof- und Ventrikelelektrode	Revision without replacement of a transvenous atrial and ventricular electrode	2717	5-059.e	operationen: Operationen am Nervensystem: Andere Operationen an Nerven und Nervenganglien: Andere Operationen an Nerven und Ganglien: Isolierter Wechsel des Sensors in der rechten Herzkammer bei einem kardialen Vagusnervstimulationssystem	Isolated sensor replacement in the right ventricle for a cardiac vagus nerve stimulation system.	equal		4250607	Replacement of transvenous atrial and ventricular pacemaker electrode leads	4090005	40482949	Insertion of vagal nerve stimulator	445319001	-36232342	-441228996	inexact
6	T	oui	6	Z37.8A.42	Implantation eines transvenösen, sondenlosen Herzschrittmachers, Einkammerstimulation	Implantation of a transvenous, leadless cardiac pacemaker, single-chamber pacing	2717	5-059.e	operationen: Operationen am Nervensystem: Andere Operationen an Nerven und Nervenganglien: Andere Operationen an Nerven und Ganglien: Isolierter Wechsel des Sensors in der rechten Herzkammer bei einem kardialen Vagusnervstimulationssystem	Isolated sensor replacement in the right ventricle for a cardiac vagus nerve stimulation system.	equal		37157743	Implantation of leadless cardiac pacemaker	1231779006	40482949	Insertion of vagal nerve stimulator	445319001	-3325206	786460005	inexact
6	T	oui	6	Z37.8F.12	Entfernen eines Zweikammer-Defibrillators	Removal of a dual-chamber defibrillator	5642	5-378.0	operationen: Operationen am Herzen: Rhythmuschirurgie und andere Operationen an Herz und Perikard: Entfernung, Wechsel und Korrektur eines Herzschrittmachers und Defibrillators: Aggregatentfernung	Procedures: Cardiac surgeries: Arrhythmia surgery and other surgeries on the heart and pericardium: Removal, replacement, and correction of a pacemaker and defibrillator: Device removal	equal		4246210	Implantation of cardiac dual-chamber device, replacement	60985004	4242529	Removal of cardiac pacemaker and replacement with single-chamber cardiac device	38208004	3681	22777000	equivalent
6	T	oui	6	Z37.99.30	Ligatur eines Herzohres	Closure of an atrial septal defect	5539	5-374.7	operationen: Operationen am Herzen: Rhythmuschirurgie und andere Operationen an Herz und Perikard: Rekonstruktion des Perikardes und des Herzens: Verschluss eines erworbenen Vorhofseptumdefektes	Procedures: Cardiac surgeries: Arrhythmia surgery and other surgeries on the heart and pericardium: Reconstruction of the pericardium and heart: Closure of an acquired atrial septal defect	inexact		4012932	Atrioseptoplasty	112811009	4012932	Atrioseptoplasty	112811009	0	0	equal
6	T	oui	6	Z38.16.16	Endarteriektomie der A. mesenterialis	Mesenteric artery endarterectomy	7748	5-543.1	operationen: Operationen am Verdauungstrakt: Andere Operationen in der Bauchregion: Exzision und Destruktion von peritonealem Gewebe: Mesenteriumresektion	Procedures: Procedures on the digestive tract: Other procedures in the abdominal region: Excision and destruction of peritoneal tissue: Mesentery resection	equal		4050139	Endarterectomy of superior mesenteric artery	233303005	40486551	Abdominal hysterectomy and excision of periuterine tissue	447771005	-36436412	-214468000	inexact
6	T	oui	6	Z38.32.10	Resektion von extrakraniellen Arterien an Kopf und Hals mit Anastomose	Resection of extracranial arteries in the head and neck with anastomosis	5939	5-393.0	operationen: Operationen an den Blutgefäßen: Andere Operationen an Blutgefäßen und Zusatzinformationen zu Operationen an Blutgefäßen: Anlegen eines anderen Shuntes und Bypasses an Blutgefäßen: Arterien Kopf, extrakraniell, und Hals	Procedures: Vascular procedures: Other vascular procedures and additional information on vascular procedures: Placement of another shunt and bypass in blood vessels: Head arteries, extracranial, and neck	equal		4171514	Arteriectomy with anastomosis of head and neck artery	49552003	40483389	Replacement of extracranial ventricular shunt	445420008	-36311875	-395868005	inexact
6	T	oui	6	Z38.47.19	Resektion von tiefen abdominalen Venen mit Ersatz, sonstige	Resection of deep abdominal veins with replacement, other	5772	5-384	operationen: Operationen an den Blutgefäßen: Inzision, Exzision und Verschluss von Blutgefäßen: Resektion und Ersatz (Interposition) an der Aorta	Operations on blood vessels: Incision, excision and ligation of blood vessels: Resection and replacement (interposition) at the aorta.	equal		4300889	Angiectomy with graft replacement of abdominal vein	77773000	4193288	Excision of blood vessel	39126001	107601	38646999	wider
6	T	oui	6	Z38.7X.11	Einsetzen eines Embolie-Protektionssystems in die Vena cava, offen chirurgisch	Placement of an embolus protection system in the inferior vena cava, open surgically	6049	5-39a.0	operationen: Operationen an den Blutgefäßen: Andere Operationen an Blutgefäßen und Zusatzinformationen zu Operationen an Blutgefäßen: Zusatzinformationen zu Operationen an Blutgefäßen: Intraoperative Anwendung eines Embolieprotektionssystems	Procedures: Vascular procedures: Other vascular procedures and additional information on vascular procedures: Additional information on vascular procedures: Intraoperative use of an embolus protection system	equal		4339955	Insertion of stent in inferior vena cava	232997003	4303451	Positioning: intraoperative	386426009	36504	-153429006	inexact
6	T	oui	6	Z38.93.11	Implantation und Wechsel eines venösen Katheterverweilsystems für Langzeitanwendung	Implantation and exchange of a venous catheter system for long-term use	16949	8-831.22	nicht operative therapeutische massnahmen: Maßnahmen für den Blutkreislauf: Therapeutische Katheterisierung und Kanüleneinlage in Gefäße: Legen und Wechsel eines Katheters in periphere und zentralvenöse Gefäße: Wechsel: Über eine periphere Vene in ein zentralvenöses Gefäß	Non-operative therapeutic measures: Measures for the circulatory system: Therapeutic catheterization and cannulation of vessels: Insertion and exchange of a catheter into peripheral and central venous vessels: Exchange: Through a peripheral vein into a central venous vessel	equal		4194550	Foley catheter long term use	395321006	4049832	Insertion of peripheral venous cannula into peripheral vein	233520008	144718	161800998	inexact
4	T	oui	4	Z38.98	Sonstige Arterienpunktion	Other arterial punctures	5895	5-39	operationen: Operationen an den Blutgefäßen: Andere Operationen an Blutgefäßen und Zusatzinformationen zu Operationen an Blutgefäßen	Procedures: Vascular procedures: Other vascular procedures and additional information on vascular procedures	equal		4212786	Puncture of artery	57931004	4342508	Vascular procedure on the penis	236358002	-129722	-178426998	inexact
6	T	oui	6	Z39.22.13	Bypass zwischen A. carotis und A. subclavia	Bypass between the carotid artery and the subclavian artery	5942	5-393.02	operationen: Operationen an den Blutgefäßen: Andere Operationen an Blutgefäßen und Zusatzinformationen zu Operationen an Blutgefäßen: Anlegen eines anderen Shuntes und Bypasses an Blutgefäßen: Arterien Kopf, extrakraniell, und Hals: Arteria carotis - Arteria subclavia	Procedures: Vascular procedures: Other vascular procedures and additional information on vascular procedures: Placement of another shunt and bypass in blood vessels: Head arteries, extracranial, and neck: Carotid artery - Subclavian artery	equal		42872695	Bypass of subclavian artery	450686004	4142641	Creation of carotid-subclavian shunt	33349003	38730054	417337001	narrower
6	T	oui	6	Z39.29.81	Temporärer intraoperativer Shunt, arterioarteriell	Temporary intraoperative shunt, arterial-arterial	5927	5-392.4	operationen: Operationen an den Blutgefäßen: Andere Operationen an Blutgefäßen und Zusatzinformationen zu Operationen an Blutgefäßen: Anlegen eines arteriovenösen Shuntes: Temporärer Shunt (intraoperativ)	Procedures: Vascular procedures: Other vascular procedures and additional information on vascular procedures: Creation of an arteriovenous shunt: Temporary shunt (intraoperative)	equal		4110974	Temporary operation	180862005	4263740	Surgical construction of arteriovenous shunt	46196009	-152766	134665996	inexact
6	T	oui	6	Z39.56.21	Plastische Rekonstruktion von Arterien der oberen Extremität mit Gewebe-Patch	Plastic reconstruction of arteries in the upper extremity with tissue patch	11863	5-906	operationen: Operationen an Haut und Unterhaut: Operative Wiederherstellung und Rekonstruktion von Haut und Unterhaut: Kombinierte plastische Eingriffe an Haut und Unterhaut	operations: Operations on skin and subcutaneous tissue: Surgical restoration and reconstruction of skin and subcutaneous tissue: Combined plastic procedures on skin and subcutaneous tissue	equal		37157264	Reconstruction of extremity using flap	1201943009	40490900	Operation on skin and/or subcutaneous tissue	447083001	-3333636	754860008	wider
6	T	oui	6	Z39.59.11	Transposition der extrakraniellen A. vertebralis	Transposition of the extracranial vertebral artery	2115	5-027.1	operationen: Operationen am Nervensystem: Andere Operationen an Schädel, Gehirn und Hirnhäuten: Anlegen eines Bypasses und Transposition von intrakraniellen Blutgefäßen: Extra-intrakranieller Bypass mit Interponat	Procedures: Neurosurgical procedures: Other procedures on skull, brain and meninges: Placement of a bypass and transposition of intracranial blood vessels: Extracranial bypass with interposition	equal		4022044	Ligation of vertebral artery	175439009	44783055	Microsurgical repair of blood vessel	699091009	-40761011	-523652000	inexact
6	T	oui	6	Z39.59.48	Sonstige plastische Rekonstruktion von sonstigen tiefen Venen der oberen Extremität	Other plastic reconstruction of other deep veins in the upper extremity	6020	5-397	operationen: Operationen an den Blutgefäßen: Andere Operationen an Blutgefäßen und Zusatzinformationen zu Operationen an Blutgefäßen: Andere plastische Rekonstruktion von Blutgefäßen	Procedures: Vascular procedures: Other vascular procedures and additional information on vascular procedures: Other reconstructive plastic surgery of blood vessels	equal		4226940	Catheterization of vein of upper limb	405429007	4244720	Destructive procedure of blood vessel	60263002	-17780	345166005	inexact
6	T	oui	6	Z39.61.15	Konventionelle extrakorporelle Zirkulation [ECC] unter Hypothermie, unbekannte Temperatur	Conventional extracorporeal circulation [ECC] under hypothermia, unknown temperature	17624	8-851.3	nicht operative therapeutische massnahmen: Maßnahmen für den Blutkreislauf: Extrakorporale Zirkulation und Behandlung von Blut: Operativer äußerer Kreislauf (bei Anwendung der Herz-Lungen-Maschine): Mit moderater Hypothermie (26 bis unter 32 °C)	Non-operative therapeutic measures: Measures for the circulatory system: Extracorporeal circulation and blood treatment: Surgical external circulation (when using a heart-lung machine): With moderate hypothermia (26 to below 32°C)	equal		4080965	Extracorporeal circulation procedure	182744004	4057277	Operative external blood circulation	182746002	23688	-1998	equivalent
6	T	oui	6	Z39.72.25	Selektive Embolisation von extrakraniellen Gefässen des Kopfes und des Halses mit Plugs	Selective embolization of extracranial vessels of the head and neck with plugs	5939	5-393.0	operationen: Operationen an den Blutgefäßen: Andere Operationen an Blutgefäßen und Zusatzinformationen zu Operationen an Blutgefäßen: Anlegen eines anderen Shuntes und Bypasses an Blutgefäßen: Arterien Kopf, extrakraniell, und Hals	Procedures: Vascular procedures: Other vascular procedures and additional information on vascular procedures: Placement of another shunt and bypass in blood vessels: Head arteries, extracranial, and neck	equal		46270871	Transcatheter embolization of head and neck vessel	708862000	40483389	Replacement of extracranial ventricular shunt	445420008	5787482	263441992	inexact
6	T	oui	6	Z39.73.31	Endovaskuläre Implantation in die Aorta thoracica von Stent-Grafts [Stent-Prothesen], ohne Öffnung	Endovascular implantation of stent-grafts (stent prostheses) into the thoracic aorta without an incision	5841	5-38a.70	operationen: Operationen an den Blutgefäßen: Inzision, Exzision und Verschluss von Blutgefäßen: Endovaskuläre Implantation von Stent-Prothesen: Aorta thoracica: Stent-Prothese, ohne Öffnung	Procedures: Vascular surgery: Incision, excision and ligation of blood vessels: Endovascular stent graft implantation: Thoracic aorta: Stent graft, without fenestration	equal		4144617	Percutaneous transluminal insertion of stent into aorta	427231006	37157747	Fenestrated thoracic endovascular aortic repair	1231787007	-33013130	-804556001	wider
6	T	oui	6	Z39.75.11	Perkutan-transluminale Gefässintervention, sonstige Gefässe, Rotationsthrombektomie	Percutaneous transluminal angioplasty, other vessels, rotational thrombectomy	17077	8-836.p	nicht operative therapeutische massnahmen: Maßnahmen für den Blutkreislauf: Therapeutische Katheterisierung und Kanüleneinlage in Gefäße: (Perkutan-)transluminale Gefäßintervention: Rotationsthrombektomie	Non-operative therapeutic measures: Measures for the circulatory system: Therapeutic catheterization and cannulation of vessels: (Percutaneous)-transluminal vascular intervention: rotational thrombectomy	equivalent		4225903	Percutaneous transluminal coronary angioplasty, multiple vessels	85053006	4022796	Percutaneous transluminal cannulation of vein	175872000	203107	-90818994	inexact
6	T	oui	6	Z39.76.30	Perkutane Laserangioplastie an präzerebralem(en) (extrakraniellem(en)) Gefäss(en)	Percutaneous laser angioplasty of a precerebral (extracranial) vessel	17085	8-837.1	nicht operative therapeutische massnahmen: Maßnahmen für den Blutkreislauf: Therapeutische Katheterisierung und Kanüleneinlage in Gefäße: Perkutan-transluminale Gefäßintervention an Herz und Koronargefäßen: Laser-Angioplastie	Non-operative therapeutic measures: Measures for the circulatory system: Therapeutic catheterization and cannulation of vessels: Percutaneous transluminal intervention on heart and coronary arteries: Laser angioplasty	equal		4048953	Percutaneous balloon angioplasty of intracranial artery	230923002	4106556	Coronary atherectomy by laser	29843007	-57603	201079995	inexact
6	T	oui	6	Z39.77.70	Perkutane endovaskuläre Fremdkörperentfernung aus intrakraniellem(n) Gefäss(en)	Percutaneous Endovascular Foreign Body Removal from Intracranial Vessels	17091	8-837.4	nicht operative therapeutische massnahmen: Maßnahmen für den Blutkreislauf: Therapeutische Katheterisierung und Kanüleneinlage in Gefäße: Perkutan-transluminale Gefäßintervention an Herz und Koronargefäßen: Fremdkörperentfernung	Non-operative therapeutic measures: Measures for the circulatory system: Therapeutic catheterization and cannulation of vessels: Percutaneous transluminal intervention of heart and coronary arteries: Foreign body removal	equal		4080728	Percutaneous removal of foreign body from intracranial vein	277998005	4138906	Percutaneous transluminal removal of foreign body from heart	426131005	-58178	-148133000	inexact
6	T	oui	6	Z39.79.25	Coil-Embolisation oder -Verschluss von viszeralen Gefässen	Coil embolization or occlusion of visceral vessels	5766	5-38...5-39	operationen: Operationen an den Blutgefäßen	Procedures on blood vessels	equal		40480053	Occlusion of patent ductus arteriosus using embolization coil	441676000	4040551	Procedure on blood vessel	118804001	36439502	322871999	inexact
6	T	oui	6	Z39.79.75	Kathetertechnischer Verschluss mittels Laser, an Gefässen der unteren Extremitäten	Laser closure of catheter access sites in lower extremity vessels	5766	5-38...5-39	operationen: Operationen an den Blutgefäßen	Procedures on blood vessels	equivalent		4159960	Procedure on blood vessel of lower extremity	373393008	4040551	Procedure on blood vessel	118804001	119409	254589007	wider
6	T	oui	6	Z39.91.99	Freilegung eines Gefässes, sonstige	Exposure of a vessel, other	5766	5-38...5-39	operationen: Operationen an den Blutgefäßen	Procedures on blood vessels	equivalent		37159224	Graded exposure therapy	1771521000000100	4040551	Procedure on blood vessel	118804001	33118673	1771520881196099	inexact
6	T	oui	6	Z39.95.21	Hämodialyse: Intermittierend, Antikoagulation mit Heparin oder ohne Antikoagulation	Hemodialysis: Intermittent, anticoagulation with heparin or without anticoagulation	17735	8-854.2	nicht operative therapeutische massnahmen: Maßnahmen für den Blutkreislauf: Extrakorporale Zirkulation und Behandlung von Blut: Hämodialyse: Intermittierend, Antikoagulation mit Heparin oder ohne Antikoagulation	Non-operative therapeutic measures: Measures for the circulatory system: Extracorporeal circulation and blood treatment: Hemodialysis: Intermittent, with or without heparin anticoagulation	equal		4051326	Intermittent hemodialysis	233575001	4180075	Extracorporeal circulation for hepatic assistance	51019008	-128749	182555993	inexact
6	T	oui	6	Z39.95.E1	Hämodiafiltration: Kontinuierlich, arteriovenös [CAVHDF], bis 24 Stunden	Hemofiltration: Continuous, arteriovenous [CAVHDF], up to 24 hours	17770	8-855.13	nicht operative therapeutische massnahmen: Maßnahmen für den Blutkreislauf: Extrakorporale Zirkulation und Behandlung von Blut: Hämodiafiltration: Kontinuierlich, arteriovenös (CAVHDF): Bis 24 Stunden	Non-operative therapeutic measures: Measures for the circulatory system: Extracorporeal circulation and blood treatment: Hemofiltration: Continuous, arteriovenous (CAVHDF): Up to 24 hours	equivalent		4050867	Continuous arteriovenous hemodiafiltration	233589006	4050867	Continuous arteriovenous hemodiafiltration	233589006	0	0	equal
6	T	oui	6	Z39.99.31	Katheterinterventioneller Verschluss des Ductus arteriosus Botalli, mit Coil	Catheter-based closure of the ductus arteriosus Botalli with coil	184	1-279.6	diagnostische massnahmen: Untersuchung einzelner Körpersysteme: Diagnostische Katheteruntersuchung an Herz und Kreislauf: Andere diagnostische Katheteruntersuchung an Herz und Gefäßen: Sondierung des Ductus arteriosus Botalli	Diagnostic measures: Examination of individual body systems: Diagnostic catheter examination of the heart and circulatory system: Other diagnostic catheter examination of the heart and vessels: Ductus arteriosus Botalli probing	equal		4050114	Closure of ductus arteriosus with clip	233199008	4134565	Hearing examination	398171003	-84451	-164971995	inexact
6	T	oui	6	Z39.9A.22	Implantation oder Wechsel einer vollständig implantierbaren Infusionspumpe zur intravenösen Infusion mit programmierbarem variablem Tagesprofil	Implantation or exchange of a fully implantable infusion pump for intravenous infusion with a programmable, variable daily profile	6039	5-399.b1	operationen: Operationen an den Blutgefäßen: Andere Operationen an Blutgefäßen und Zusatzinformationen zu Operationen an Blutgefäßen: Andere Operationen an Blutgefäßen: Implantation oder Wechsel einer implantierbaren Medikamentenpumpe (z.B. zur Chemotherapie oder zur Schmerztherapie): Programmierbare Medikamentenpumpe mit kontinuierlicher Abgabe bei variablem Tagesprofil	Procedures: Vascular procedures: Other vascular procedures and additional information on vascular procedures: Other vascular procedures: Implantation or exchange of an implantable drug pump (e.g., for chemotherapy or pain therapy): Programmable drug pump with continuous delivery at a variable daily profile	equal		4240363	Insertion of implantable intravenous infusion pump	58866001	4203581	Continuous infusion of chemotherapy	309698005	36782	-250832004	inexact
6	T	oui	6	Z39.B4.M1	(Perkutan-)transluminale Implantation von gecoverten Stents mit Medikamentenfreisetzung, Gefässmalformationen	Transluminal implantation of drug-eluting covered stents, vascular malformations	17582	8-848.0	nicht operative therapeutische massnahmen: Maßnahmen für den Blutkreislauf: (Perkutan-)transluminale Stentimplantation: (Perkutan-)transluminale Implantation von medikamentefreisetzenden gecoverten Stents (Stent-Graft): Ein Stent	Non-operative therapeutic measures: Measures for the circulatory system: (Percutaneous-) transluminal stent implantation: (Percutaneous-) transluminal implantation of drug-eluting covered stents (stent graft): A stent	equal		44789455	Insertion of drug-eluting coronary artery stent	203741000000101	4178170	Percutaneous transluminal insertion of stent graft into hepatic artery	428585008	40611285	203740571415093	inexact
6	T	oui	6	Z40.3X.09	Exzision von regionalen Lymphknoten, sonstige	Excision of regional lymph nodes, other	6229	5-406.y	operationen: Operationen am hämatopoetischen und Lymphgefäßsystem: Operationen am Lymphgewebe: Regionale Lymphadenektomie (Ausräumung mehrerer Lymphknoten einer Region) im Rahmen einer anderen Operation: Nicht näher bezeichnet	Operations on the hematopoietic and lymphatic system: Operations on lymph tissue: Regional lymphadenectomy (removal of multiple lymph nodes in a region) as part of another operation: Not further specified	equal		4064257	Excision of regional lymph nodes	21525004	40481912	Excision of sentinel lymph node	443497002	-36417655	-421971998	narrower
6	T	oui	6	Z40.51.11	Radikale Exzision von axillären Lymphknoten im Rahmen eines anderen Eingriffs	Radical excision of axillary lymph nodes as part of another procedure	6233	5-407.01	operationen: Operationen am hämatopoetischen und Lymphgefäßsystem: Operationen am Lymphgewebe: Radikale (systematische) Lymphadenektomie im Rahmen einer anderen Operation: Axillär: Level 1	Procedures: Procedures on the hematopoietic and lymphatic system: Procedures on lymph tissue: Radical (systematic) lymphadenectomy as part of another operation: Axillary: Level 1	equal		4194967	Complete axillary lymphadenectomy	79544006	4030153	Operative procedure on hematopoietic system	107994000	164814	-28449994	wider
4	T	oui	4	Z40.62	Fistulierung des Ductus thoracicus	Thoracodorsal duct fistulization	6206	5-405.1	operationen: Operationen am hämatopoetischen und Lymphgefäßsystem: Operationen am Lymphgewebe: Operationen am Ductus thoracicus: Verschluss einer Chylusfistel, thorakoskopisch	Procedures: Procedures on the hematopoietic and lymphatic system: Procedures on lymph tissue: Procedures on the thoracic duct: Closure of a chylo fistula, thoracoscopically	equal		4264198	Fistulization of thoracic duct	47251001	4040394	Procedure on hematopoietic system	118685000	223804	-71433999	wider
6	T	oui	6	Z41.0A.11	Hämatopoetische Stammzellentnahme aus dem Knochenmark, autolog	Autologous hematopoietic stem cell harvest from bone marrow	6279	5-410.10	operationen: Operationen am hämatopoetischen und Lymphgefäßsystem: Operationen an Milz und Knochenmark: Entnahme von hämatopoetischen Stammzellen aus Knochenmark und peripherem Blut zur Transplantation und von peripheren Blutzellen zur Transfusion: Hämatopoetische Stammzellen aus peripherem Blut: Zur Eigenspende	Operations on the hematopoietic and lymphatic system: Operations on spleen and bone marrow: Harvesting of hematopoietic stem cells from bone marrow and peripheral blood for transplantation and of peripheral blood cells for transfusion: Hematopoietic stem cells from peripheral blood: For autologous donation	equal		46271079	Transplantation of autologous hematopoietic stem cell	709115004	46271079	Transplantation of autologous hematopoietic stem cell	709115004	0	0	equal
6	T	oui	6	Z41.0E.12	Entnahme von T-Zellen, autolog, zur In-vitro-Kultur und tumorspezifischen In-vitro-Aufbereitung von CAR-T-Zellen	Harvesting of T cells, autologous, for in vitro culture and tumor-specific in vitro preparation of CAR-T cells	6287	5-410.30	operationen: Operationen am hämatopoetischen und Lymphgefäßsystem: Operationen an Milz und Knochenmark: Entnahme von hämatopoetischen Stammzellen aus Knochenmark und peripherem Blut zur Transplantation und von peripheren Blutzellen zur Transfusion: Periphere Blutzellen, Lymphozyten: Autogen, T-Zellen zur Ex-vivo-Kultur und tumorspezifischen In-vitro-Aufbereitung	Procedures: Operations on the hematopoietic and lymphatic system: Operations on spleen and bone marrow: Harvesting of hematopoietic stem cells from bone marrow and peripheral blood for transplantation and of peripheral blood cells for transfusion: Peripheral blood cells, lymphocytes: Autologous, T-cells for ex vivo culture and tumor-specific in vitro processing	equal		44809142	Autologous transplantation of pancreatic islet cells	844191000000106	46271079	Transplantation of autologous hematopoietic stem cell	709115004	-1461937	844190290885102	inexact
4	T	oui	4	Z41.43	Partielle Splenektomie	Partial splenectomy	6317	5-413.0	operationen: Operationen am hämatopoetischen und Lymphgefäßsystem: Operationen an Milz und Knochenmark: Splenektomie: Partiell	Operations on the hematopoietic and lymphatic system: Operations on spleen and bone marrow: Splenectomy: Partial	equal		4281839	Partial splenectomy	67097003	4030153	Operative procedure on hematopoietic system	107994000	251686	-40896997	wider
4	T	oui	4	Z42.22	Ösophagoskopie durch ein künstliches Stoma	Esophagoscopy through an artificial stoma	1001	1-638	diagnostische massnahmen: Diagnostische Endoskopie: Diagnostische Endoskopie des oberen Verdauungstraktes: Diagnostische Endoskopie des oberen Verdauungstraktes über ein Stoma	Diagnostic measures: Diagnostic endoscopy: Upper gastrointestinal endoscopy: Upper gastrointestinal endoscopy via a stoma	equal		4053373	Esophagoscopy through artificial stoma	16029001	4294382	Esophagogastroduodenoscopy	76009000	-241009	-59979999	wider
6	T	oui	6	Z42.33.20	Endoskopische Exzision oder Destruktion von Läsion oder Gewebe am Ösophagus, Elektro-, Thermo- und Kryoablation	Endoscopic excision or destruction of lesions or tissue in the esophagus, including electro-, thermo-, and cryotherapy ablation	6361	5-422.5	operationen: Operationen am Verdauungstrakt: Operationen am Ösophagus: Lokale Exzision und Destruktion von erkranktem Gewebe des Ösophagus: Destruktion, endoskopisch	Procedures: Procedures on the digestive tract: Procedures on the esophagus: Local excision and destruction of diseased esophageal tissue: Endoscopic destruction	equal		43531557	Endoscopic excision of tissue of esophagus	609280006	43531557	Endoscopic excision of tissue of esophagus	609280006	0	0	equal
4	T	oui	4	Z42.52	Intrathorakale Ösophagogastrostomie	Intra-thoracic esophagogastrostomy	6378	5-424.12	operationen: Operationen am Verdauungstrakt: Operationen am Ösophagus: Partielle Ösophagusresektion mit Wiederherstellung der Kontinuität: Thorakoabdominal: Mit proximaler Magenresektion (Kardia und Fundus) und Hochzug des Restmagens, durch Thorakotomie	Procedures: Procedures on the digestive tract: Procedures on the esophagus: Partial esophagectomy with restoration of continuity: Thoracoabdominal: With proximal gastric resection (cardia and fundus) and elevation of the remaining stomach via thoracotomy	equal		4321832	Esophagogastrostomy	70676003	4140874	Partial esophagectomy and proximal gastrectomy	265340005	180958	-194664002	narrower
6	T	oui	6	Z42.7X.31	Ösophago-Gastromyotomie, offen chirurgisch	Open esophageal myotomy	6340	5-420.0	operationen: Operationen am Verdauungstrakt: Operationen am Ösophagus: Inzision des Ösophagus: Ösophagomyotomie	operations: Operations on the digestive tract: Operations on the esophagus: Incision of the esophagus: Esophagomyotomy	narrower		4123742	Long esophageal myotomy	235182009	4128700	Esophagomyotomy	235183004	-4958	-995	wider
6	T	oui	6	Z42.81.10	Einsetzen und Wechsel einer nicht selbstexpandierenden Prothese (permanenter Tubus) in den Ösophagus, endoskopisch	Insertion and exchange of a non-self-expanding prosthesis in the esophagus, endoscopically	6446	5-429.k1	operationen: Operationen am Verdauungstrakt: Operationen am Ösophagus: Andere Operationen am Ösophagus: Maßnahmen bei nicht selbstexpandierender Prothese: Einlegen oder Wechsel, endoskopisch	Procedures: Procedures on the digestive tract: Procedures on the esophagus: Other procedures on the esophagus: Measures for non-self-expanding prosthesis: Insertion or exchange, endoscopically	equal		4129658	Endoscopic insertion of tubal prosthesis into esophagus	290018002	4143680	Fiberoptic endoscopic insertion of expanding metal stent into esophagus	426887000	-14022	-136868998	narrower
6	T	oui	6	Z42.88.11	Entfernung von Prothesen aus dem Ösophagus, offen chirurgisch	Removal of prosthesis from esophagus, open surgical	6686	5-449.j	operationen: Operationen am Verdauungstrakt: Andere Operationen am Magen: Andere Operationen am Magen: Entfernung einer selbstexpandierenden Prothese	Procedures: Procedures on the digestive tract: Other procedures on the stomach: Other procedures on the stomach: Removal of a self-expanding prosthesis	equal		4128703	Removal of prosthesis from esophagus	235208001	4128711	Removal of prosthesis from stomach	235244006	-8	-36005	inexact
6	T	oui	6	Z42.99.41	Schlingenligatur und Clipping am Ösophagus, endoskopisch	Esophageal ligation and clipping, endoscopic	6425	5-429.d	operationen: Operationen am Verdauungstrakt: Operationen am Ösophagus: Andere Operationen am Ösophagus: Endoskopisches Clippen	Procedures: Procedures on the digestive tract: Procedures on the esophagus: Other procedures on the esophagus: Endoscopic clipping	equal		44784309	Endoscopic coagulation of esophageal hemorrhage	698412001	4043182	Procedure on digestive tract	118826000	40741127	579586001	wider
6	T	oui	6	Z43.6X.10	Pylorusresektion mit Anastomose zum Duodenum	Pyloric resection with anastomosis to the duodenum	6503	5-432	operationen: Operationen am Verdauungstrakt: Inzision, Exzision und Resektion am Magen: Operationen am Pylorus	Procedures: Gastrointestinal surgeries: Incision, excision, and resection of the stomach: Procedures at the pylorus	equal		4310408	Distal subtotal gastrectomy	85217002	4041977	Gastrointestinal tract excision	118150001	268431	-32932999	wider
6	T	oui	6	Z43.89.21	Biliopankreatische Diversion des Magens nach Scopinaro, laparoskopisch	Bilioenteric diversion of the stomach after Scopinaro, laparoscopically	6537	5-434.3	operationen: Operationen am Verdauungstrakt: Inzision, Exzision und Resektion am Magen: Atypische partielle Magenresektion: Biliopankreatische Diversion nach Scopinaro	Procedures: Gastrointestinal surgeries: Incision, excision and resection of the stomach: Atypical partial gastric resection: Scopinaro biliary pancreatic diversion	equal		44782528	Laparoscopic ureteroileostomy with urinary diversion	699570007	40489317	Endoscopy of upper gastrointestinal tract and excision of polyp of stomach	446735004	4293211	252835003	inexact
6	T	oui	6	Z43.89.42	Sleeve resection nach Magenband, offen chirurgisch	Sleeve resection after gastric banding, open surgery	6624	5-447.90	operationen: Operationen am Verdauungstrakt: Andere Operationen am Magen: Revision nach Magenresektion: Umwandlung eines Schlauchmagens in einen Magenbypass durch Transsektion und Blindverschluss des Schlauchmagens und Gastrojejunostomie mit Roux-Y-Anastomose: Offen chirurgisch	Procedures: Procedures on the digestive tract: Other stomach procedures: Revision after gastric resection: Conversion of a sleeve gastrectomy to a gastric bypass by transection and blind closure of the sleeve gastrectomy and gastrojejunostomy with Roux-Y anastomosis: Open surgery	equal		4337608	Pneumonectomy with tracheobronchoplasty	232647000	4206490	Revision of gastrojejunal anastomosis with reconstruction with partial gastrectomy	55718003	131118	176928997	inexact
4	T	oui	4	Z44.14	Geschlossene [endoskopische] Biopsie am Magen	Closed [endoscopic] biopsy of the stomach	385	1-440.9	diagnostische massnahmen: Biopsie ohne Inzision: Biopsie ohne Inzision an den Verdauungsorganen: Endoskopische Biopsie an oberem Verdauungstrakt, Gallengängen und Pankreas: Stufenbiopsie am oberen Verdauungstrakt	Diagnostic measures: Biopsy without incision: Endoscopic biopsy of the upper gastrointestinal tract, biliary tract, and pancreas: Stage biopsy of the upper gastrointestinal tract.	equal		4004241	Endoscopic biopsy of stomach	10077008	40485932	Endoscopy and biopsy of upper gastrointestinal tract	445982009	-36481691	-435905001	wider
6	T	oui	6	Z44.31.15	Proximaler Magenbypass nach Gastric Banding, nach bariatrischem Voreingriff, offen chirurgisch	Proximal gastric bypass after gastric banding, after bariatric surgery, open surgical procedure	6632	5-447.b0	operationen: Operationen am Verdauungstrakt: Andere Operationen am Magen: Revision nach Magenresektion: Umwandlung eines Ein-Anastomosen-Magenbypasses in einen Magenbypass mit Roux-Y-Anastomose: Offen chirurgisch	Procedures: Procedures on the digestive tract: Other procedures on the stomach: Revision after gastric resection: Conversion of a single anastomosis gastric bypass to a Roux-Y gastric bypass: Open surgery	equal		45768716	Assessment for bariatric surgery	707206008	40483730	Bypass of stomach with short limb Roux-en-Y gastroenterostomy	443906008	5284986	263300000	inexact
4	T	oui	4	Z44.41	Übernähung eines Ulcus ventriculi	Overgrowth of a gastric ulcer	6963	5-469.7	operationen: Operationen am Verdauungstrakt: Andere Operationen an Dünn- und Dickdarm: Andere Operationen am Darm: Übernähung eines Ulkus	Procedures: Procedures on the digestive tract: Other procedures on the small and large intestine: Other intestinal procedures: Ulcer oversewing	inexact		4076419	Excision of overgrowth of bone	178912006	4017441	Oversewing of small intestine	174005007	58978	4906999	inexact
6	T	oui	6	Z44.65.10	Ösophagogastroplastik, Kardiaplastik, offen chirurgisch	Esophageal gastric plastic surgery, cardiac plastic surgery, open surgical	6649	5-448.3	operationen: Operationen am Verdauungstrakt: Andere Operationen am Magen: Andere Rekonstruktion am Magen: Kardiaplastik (z.B. nach Belsey)	Procedures: Gastrointestinal procedures: Other stomach surgeries: Other stomach reconstructions: Cardiac plastic surgery (e.g., after Belsey)	equal		4049990	Transesophageal cardiac pacing procedure	233180004	4275564	Operation on heart	64915003	-225574	168265001	wider
6	T	oui	6	Z44.95.31	Schlauchmagen-Gastroplastik, endoskopisch	Endoscopic gastric sleeve gastrectomy	6546	5-434.50	operationen: Operationen am Verdauungstrakt: Inzision, Exzision und Resektion am Magen: Atypische partielle Magenresektion: Herstellung eines Schlauchmagens [Sleeve Resection]: Offen chirurgisch	Procedures: Gastrointestinal surgeries: Incision, excision and resection of the stomach: Atypical partial gastric resection: Creation of a sleeve gastrectomy [Sleeve Resection]: Open surgery	equivalent		4143852	Laparoscopic sleeve gastrectomy	427074001	4227605	Sleeve resection of stomach	87604009	-83753	339469992	wider
6	T	oui	6	Z44.96.14	Bandwechsel nach Gastric Banding, laparoskopisch	Band exchange after gastric banding, laparoscopic	6663	5-448.e	operationen: Operationen am Verdauungstrakt: Andere Operationen am Magen: Andere Rekonstruktion am Magen: Entfernung eines Magenbandes	Procedures: Procedures on the digestive tract: Other stomach procedures: Other stomach reconstructions: Removal of a gastric band	equal		4190525	Laparoscopic adjustable gastric banding	414574004	4142551	Removal of gastric band	426559000	47974	-11984996	wider
4	T	oui	4	Z45.01	Inzision am Duodenum	Duodenal incision	6719	5-450.0	operationen: Operationen am Verdauungstrakt: Inzision, Exzision, Resektion und Anastomose an Dünn- und Dickdarm: Inzision des Darmes: Duodenum	Procedures: Gastrointestinal procedures: Incision, excision, resection and anastomosis of small and large intestine: Intestinal incision: duodenum	equal		4307652	Incision of duodenum	83599002	4170610	Gastrointestinal anastomosis procedure	274026006	137042	-190427004	inexact
4	T	oui	4	Z45.12	Endoskopie am Dünndarm durch ein künstliches Stoma	Endoscopy of the small intestine through an artificial stoma	1030	1-652	diagnostische massnahmen: Diagnostische Endoskopie: Diagnostische Endoskopie des unteren Verdauungstraktes: Diagnostische Endoskopie des Darmes über ein Stoma	Diagnostic measures: Diagnostic endoscopy: Diagnostic endoscopy of the lower gastrointestinal tract: Diagnostic endoscopy of the bowel through a stoma	equal		4200684	Endoscopy of small intestine through artificial stoma	53402007	37156556	Endoscopy of lower gastrointestinal tract	1174027007	-32955872	-1120625000	wider
6	T	oui	6	Z45.30.10	Endoskopische Mukosaresektion im Duodenum	Endoscopic mucosal resection in the duodenum	6719	5-450.0	operationen: Operationen am Verdauungstrakt: Inzision, Exzision, Resektion und Anastomose an Dünn- und Dickdarm: Inzision des Darmes: Duodenum	Procedures: Gastrointestinal procedures: Incision, excision, resection and anastomosis of small and large intestine: Intestinal incision: duodenum	equal		44806292	Endoscopic mucosal resection of lesion of duodenum	821071000000109	4170610	Gastrointestinal anastomosis procedure	274026006	40635682	821070725974103	inexact
6	T	oui	6	Z45.41.09	Lokale Exzision von Läsion oder Gewebe im Dickdarm, sonstige	Local excision of lesion or tissue in the colon, other	6803	5-452.x	operationen: Operationen am Verdauungstrakt: Inzision, Exzision, Resektion und Anastomose an Dünn- und Dickdarm: Lokale Exzision und Destruktion von erkranktem Gewebe des Dickdarmes: Sonstige	Procedures: Gastrointestinal procedures: Incision, excision, resection and anastomosis of small and large intestine: Local excision and destruction of diseased colonic tissue: Other	equal		4016092	Excision of lesion of patella	104001	4170610	Gastrointestinal anastomosis procedure	274026006	-154518	-273922005	inexact
4	T	oui	4	Z45.51	Isolation eines Dünndarmsegments	Isolation of a small bowel segment	6813	5-454.1	operationen: Operationen am Verdauungstrakt: Inzision, Exzision, Resektion und Anastomose an Dünn- und Dickdarm: Resektion des Dünndarmes: Segmentresektion des Jejunums	Procedures: Gastrointestinal procedures: Incision, excision, resection and anastomosis of small and large intestine: Small bowel resection: Segmentectomy of the jejunum	equal		4186565	Small bowel series	41500002	4019076	Partial jejunectomy	116027003	167489	-74527001	inexact
6	T	oui	6	Z45.72.11	Ileozäkale Resektion, offen chirurgisch	Ileocolic resection, open surgical	6828	5-455.31	operationen: Operationen am Verdauungstrakt: Inzision, Exzision, Resektion und Anastomose an Dünn- und Dickdarm: Partielle Resektion des Dickdarmes: Zäkumresektion: Offen chirurgisch	Procedures: Gastrointestinal surgeries: Incision, excision, resection and anastomosis of small and large intestine: Partial resection of the colon: Colectomy: Open surgery	equal		4078310	Ileocolic resection	276190007	4184913	Partial excision of small intestine	54357003	-106603	221833004	wider
6	T	oui	6	Z45.75.21	Hemikolektomie links mit Sigmoidektomie, offen chirurgisch	Left hemicolectomy with sigmoid colectomy, open surgical	6833	5-455.6	operationen: Operationen am Verdauungstrakt: Inzision, Exzision, Resektion und Anastomose an Dünn- und Dickdarm: Partielle Resektion des Dickdarmes: Resektion des Colon descendens mit linker Flexur [Hemikolektomie links]	Procedures: Gastrointestinal surgeries: Incision, excision, resection and anastomosis of small and large intestine: Partial resection of the colon: Resection of the descending colon with left flexure [left hemicolectomy]	equal		4202563	Sigmoid colectomy with stoma	315327002	4163693	Closure of enterostomy of small intestine with resection and anastomosis	45274003	38870	270052999	inexact
6	T	oui	6	Z45.92.11	Dünndarm-Rektum-Anastomose mit Bildung eines Reservoirs [Pouch]	Thin bowel-rectum anastomosis with formation of a reservoir [pouch]	6924	5-467.7	operationen: Operationen am Verdauungstrakt: Andere Operationen an Dünn- und Dickdarm: Andere Rekonstruktion des Darmes: Anlegen eines Reservoirs	Procedures: Gastrointestinal procedures: Other procedures on small and large intestine: Other intestinal reconstruction: Creation of a reservoir	inexact		40485319	Excision of rectum with anastomosis of colon to anus and creation of colonic reservoir	442806002	4002558	Large intestine reconstruction	119893009	36482761	322912993	wider
6	T	oui	6	Z46.15.12	Doppelläufige Kolostomie, laparoskopisch	Double-barrel colostomy, laparoscopic	6860	5-460.2	operationen: Operationen am Verdauungstrakt: Andere Operationen an Dünn- und Dickdarm: Anlegen eines Enterostomas, doppelläufig, als selbständiger Eingriff: Aszendostoma	Procedures: Gastrointestinal procedures: Other procedures on small and large intestine: Creation of a double-barrel enterostomy as an independent procedure: Ascending colostomy	equal		4150688	Enterectomy with double-barrel enterostomy	31158009	4150688	Enterectomy with double-barrel enterostomy	31158009	0	0	equal
6	T	oui	6	Z46.41.10	Plastische Erweiterung oder Einengung eines Dünndarm-Stomas	Plastic widening or narrowing of a small bowel stoma	6897	5-464.1	operationen: Operationen am Verdauungstrakt: Andere Operationen an Dünn- und Dickdarm: Revision und andere Eingriffe an einem Enterostoma: Plastische Einengung	Procedures: Gastrointestinal procedures: Other procedures on small and large intestine: Revision and other interventions at a stoma: Plastic narrowing	equal		4346069	Small bowel barium enema	241162004	4263259	Revision of stoma of large intestine	361152000	82810	-119989996	inexact
6	T	oui	6	Z46.42.21	Plastische Rekonstruktion einer Parastomalhernie, laparoskopisch, ohne Implantation von Membranen oder Netzen	Plastic reconstruction of a parastomal hernia, laparoscopic, without implantation of membranes or meshes	9126	5-693	operationen: Operationen an den weiblichen Genitalorganen: Andere Operationen am Uterus und Operationen an den Parametrien: Plastische Rekonstruktion der Parametrien (bei Lagekorrektur des Uterus)	Operations on female genital organs: Other operations on the uterus and operations on the parametria: Plastic reconstruction of the parametria (in case of uterine repositioning)	equal		4260104	Laparoscopic construction of gastric stoma	440078007	4129747	Operation on female genital organs	12658000	130357	427420007	inexact
6	T	oui	6	Z46.74.12	Verschluss einer Dünndarmfistel, ausgenommen Duodenum, laparoskopisch	Laparoscopic closure of a small bowel fistula (excluding duodenum)	6919	5-467.2	operationen: Operationen am Verdauungstrakt: Andere Operationen an Dünn- und Dickdarm: Andere Rekonstruktion des Darmes: Verschluss einer Darmfistel, endoskopisch	Procedures: Gastrointestinal procedures: Other procedures on small and large intestine: Other intestinal reconstruction: Endoscopic closure of a fistula.	equal		40488322	Laparoscopic closure of fistula of ureter	446544001	37016712	Endoscopic closure of fistula of small intestine	712815006	3471610	-266271005	inexact
6	T	oui	6	Z46.79.41	Anlegen eines Reservoirs, Dickdarm	Creating a reservoir, colon	6924	5-467.7	operationen: Operationen am Verdauungstrakt: Andere Operationen an Dünn- und Dickdarm: Andere Rekonstruktion des Darmes: Anlegen eines Reservoirs	Procedures: Gastrointestinal procedures: Other procedures on small and large intestine: Other intestinal reconstruction: Creation of a reservoir	equal		4123403	Creation of ileal pouch	235332005	4002558	Large intestine reconstruction	119893009	120845	115438996	wider
6	T	oui	6	Z46.85.12	Bougierung des Darmes, laparoskopisch	Colonoscopy, laparoscopic	1032	1-652.1	diagnostische massnahmen: Diagnostische Endoskopie: Diagnostische Endoskopie des unteren Verdauungstraktes: Diagnostische Endoskopie des Darmes über ein Stoma: Koloskopie	Diagnostic measures: Diagnostic endoscopy: Diagnostic endoscopy of the lower gastrointestinal tract: Diagnostic endoscopy of the bowel through a stoma: Colonoscopy	inexact		4251314	Laparoscopy	73632009	37156556	Endoscopy of lower gastrointestinal tract	1174027007	-32905242	-1100394998	narrower
6	T	oui	6	Z46.99.81	Durchtrennung der Laddschen Bänder, offen chirurgisch	Division of the Ladd's bands, open surgery	6962	5-469.6	operationen: Operationen am Verdauungstrakt: Andere Operationen an Dünn- und Dickdarm: Andere Operationen am Darm: Durchtrennung der Laddschen Bänder	Procedures: Procedures on the digestive tract: Other procedures on the small and large intestine: Other intestinal procedures: Division of the Ladd bands	equal		4302749	Tenotomy	78545003	4043182	Procedure on digestive tract	118826000	259567	-40280997	inexact
3	T	oui	3	Z47.2	Drainage eines Appendixabszesses	Drainage of an appendiceal abscess	7009	5-479.0	operationen: Operationen am Verdauungstrakt: Operationen an der Appendix: Andere Operationen an der Appendix: Inzision und Drainage eines perityphlitischen Abszesses	Procedures: Procedures on the digestive tract: Appendectomy: Other appendectomy procedures: Incision and drainage of a perityphlitic abscess	equal		4018156	Drainage of appendix abscess	174052001	4291953	Incision and drainage of abscess of appendix	37402004	-273797	136649997	narrower
6	T	oui	6	Z48.29.10	Chromoendoskopie an Rektum, Rektosigmoid und Perirektalgewebe	Chromoendoscopy of rectum, rectosigmoid, and perirectal tissue	1044	1-655	diagnostische massnahmen: Diagnostische Endoskopie: Diagnostische Endoskopie des unteren Verdauungstraktes: Chromoendoskopie des unteren Verdauungstraktes	Diagnostic measures: Diagnostic endoscopy: Diagnostic endoscopy of the lower gastrointestinal tract: Chromoendoscopy of the lower gastrointestinal tract	equal		4087381	Sigmoidoscopy	24420007	37156556	Endoscopy of lower gastrointestinal tract	1174027007	-33069175	-1149607000	wider
6	T	oui	6	Z48.35.11	Lokale Schlingenresektion, submuköse Exzision oder Vollwandexzision (lokal) von rektaler Läsion oder Gewebe, sonstiger Zugang (transanal, endoskopisch-mikrochirurgisch)	Local sling resection, submucosal excision or full-thickness excision of rectal lesion or tissue, other approach	7017	5-482.1	operationen: Operationen am Verdauungstrakt: Operationen am Rektum: Peranale lokale Exzision und Destruktion von erkranktem Gewebe des Rektums: Submukosale Exzision	Procedures: Procedures on the digestive tract: Procedures on the rectum: Perianal local excision and destruction of diseased rectal tissue: Submucosal excision	equal		4215038	Excision of lesion of eyelid, major, full-thickness	81108001	4152086	Transanal submucosal excision of rectal tumor	314610005	62952	-233502004	inexact
6	T	oui	6	Z48.66.12	Manschettenresektion und tubuläre Resektion des Rektums, mit Enterostoma und Blindverschluss, offen chirurgisch	Fistulization and tubular resection of the rectum, with enterostomy and blind closure, open surgery	7074	5-486.2	operationen: Operationen am Verdauungstrakt: Operationen am Rektum: Rekonstruktion des Rektums: Verschluss einer Rektum-Haut-Fistel	operations: Operations on the digestive tract: Operations on the rectum: Rectal reconstruction: Closure of a rectal skin fistula	inexact		4227266	Closure of enterostomy of large intestine with resection and anastomosis	87602008	4293902	Operation on digestive tract	37661000	-66636	49941008	wider
6	T	oui	6	Z48.66.23	Anteriore Rektumresektion, mit Anastomose, laparoskopisch	Anterior rectal resection with anastomosis, laparoscopic	7048	5-484.0	operationen: Operationen am Verdauungstrakt: Operationen am Rektum: Rektumresektion unter Sphinktererhaltung: Anteriore Manschettenresektion	Procedures: Procedures on the digestive tract: Procedures on the rectum: Rectal resection with sphincter preservation: Anterior stapled transection	equal		4197729	Anterior resection of rectum with anastomosis	315328007	4043182	Procedure on digestive tract	118826000	154547	196502007	wider
6	T	oui	6	Z48.75.11	Abdominale Rektopexie, offen chirurgisch	Open abdominal rectopexy	7608	5-531.4	operationen: Operationen am Verdauungstrakt: Verschluss abdominaler Hernien: Verschluss einer Hernia femoralis: Offen chirurgisch, mit Darmresektion, ohne zusätzliche Laparotomie	Procedures: Gastrointestinal procedures: Abdominal hernia repair: Femoral hernia repair: Open surgical, with bowel resection, without additional laparotomy	equal		4010018	Proctopexy	10259007	43531115	Laparoscopic repair of femoral hernia with prosthesis	608814005	-39521097	-598554998	inexact
4	T	oui	4	Z49.03	Exzision von Marisken	Excision of margins	11754	5-894	operationen: Operationen an Haut und Unterhaut: Operationen an Haut und Unterhaut: Lokale Exzision von erkranktem Gewebe an Haut und Unterhaut	Surgeries on skin and subcutaneous tissue: Local excision of diseased tissue from skin and subcutaneous tissue	inexact		37204039	Marginal excision	787140002	4256768	Local excision of skin and subcutaneous tissue	40862005	32947271	746277997	narrower
6	T	oui	6	Z49.29.20	Endoskopische Laser-Endomikroskopie am Anus und Perianalgewebe	Endoscopic laser endomicroscopy of the anus and perianal tissue	7106	5-490	operationen: Operationen am Verdauungstrakt: Operationen am Anus: Inzision und Exzision von Gewebe der Perianalregion	Procedures: Procedures on the digestive tract: Procedures on the anus: Incision and excision of tissue in the perianal region	equal		37204021	Volumetric laser endomicroscopy	787088002	4182577	Excision of perianal tissue	42980009	33021444	744107993	inexact
4	T	oui	4	Z49.43	Kauterisierung von Hämorrhoiden	Hemorrhoid cauterization	7139	5-493	operationen: Operationen am Verdauungstrakt: Operationen am Anus: Operative Behandlung von Hämorrhoiden	Procedures: Procedures on the digestive tract: Procedures on the anus: Operative treatment of hemorrhoids	equal		4287935	Cauterization of hemorrhoids	397202000	4123420	Hemorrhoid operation	235388001	164515	161813999	wider
6	T	oui	6	Z49.46.10	Exzision von Hämorrhoiden, Stapler-Hämorrhoidopexie	Excision of hemorrhoids, stapled hemorrhoidopexy	7150	5-493.5	operationen: Operationen am Verdauungstrakt: Operationen am Anus: Operative Behandlung von Hämorrhoiden: Mit Stapler	Procedures: Procedures on the digestive tract: Procedures on the anus: Operative treatment of hemorrhoids: With stapler	equal		4123421	Open hemorrhoidectomy	235389009	4133515	Stapling of hemorrhoid	412737002	-10094	-177347993	narrower
6	T	oui	5	Z49.77.12	Anoproktoplastik, perineal	Analoplasty, perineal	7171	5-495.6	operationen: Operationen am Verdauungstrakt: Operationen am Anus: Primäre plastische Rekonstruktion bei anorektalen Anomalien: Analplastik, perineal	operations: Operations on the digestive tract: Operations on the anus: Primary plastic reconstruction in anorectal anomalies: Analplasty, perineal	narrower		4164307	Posterior vestibuloplasty, bilateral	45713001	4293902	Operation on digestive tract	37661000	-129595	8052001	wider
6	T	oui	6	Z49.78.09	Rekonstruktion kongenitaler anorektaler Agenesien und Analatresien, sonstige	Reconstruction of congenital anal agenesis and atresia, others	7165	5-495	operationen: Operationen am Verdauungstrakt: Operationen am Anus: Primäre plastische Rekonstruktion bei anorektalen Anomalien	Procedures: Procedures on the digestive tract: Procedures on the anus: Primary plastic reconstruction in anorectal anomalies	narrower		4067445	Reanastomosis of rectum to anal canal for correction of congenital atresia of rectum	174349004	4043182	Procedure on digestive tract	118826000	24263	55523004	wider
6	T	oui	6	Z49.78.14	Posteriore sagittale Anorektoplastik [PSARP] mit Korrektur einer Fehlbildung der Vagina, offen chirurgisch und perineal	Posterior sagittal anorectoplasty [PSARP] with correction of a vaginal malformation, open surgery and perineal approach	7169	5-495.3	operationen: Operationen am Verdauungstrakt: Operationen am Anus: Primäre plastische Rekonstruktion bei anorektalen Anomalien: Posteriore sagittale Anorektoplastik [Posteriore sagittale Anorektoplastik] mit Korrektur einer Fehlbildung der Vagina mit ortsständigem Gewebe	Procedures: Procedures on the digestive tract: Procedures on the anus: Primary plastic reconstruction in anorectal anomalies: Posterior sagittal anorectoplasty [Posterior sagittal anorectoplasty] with correction of a vaginal malformation using local tissue	equal		4123417	Posterior sagittal anorectoplasty	235374000	4123417	Posterior sagittal anorectoplasty	235374000	0	0	equal
4	T	oui	4	Z49.94	Reposition eines Analprolapses	Repair of an anal prolapse	7175	5-496.0	operationen: Operationen am Verdauungstrakt: Operationen am Anus: Rekonstruktion des Anus und des Sphinkterapparates: Naht (nach Verletzung)	Procedures: Procedures on the digestive tract: Procedures on the anus: Reconstruction of the anus and sphincter apparatus: Suture (after injury)	inexact		4026223	Repair of rectal prolapse	12092003	4043182	Procedure on digestive tract	118826000	-16959	-106733997	wider
6	T	oui	6	Z50.13.00	Transjuguläre Leberbiopsie, n.n.bez.	Transjugular liver biopsy, as needed	675	1-497.3	diagnostische massnahmen: Biopsie ohne Inzision: Biopsie ohne Inzision an anderen Organen und Geweben: Transvenöse oder transarterielle Biopsie: Leber	Diagnostic measures: Incisional biopsy: Incisional biopsy of other organs and tissues: Transvenous or transarterial biopsy: Liver	equal		4327721	Transjugular biopsy of liver	430799001	4052901	Incisional biopsy of testis	1251000	274820	429548001	inexact
6	T	oui	6	Z50.23.11	Lokale Leberexzision von 1-2 Herden, je bis zu 4 cm im Durchmesser, offen chirurgisch	Local liver resection of 1-2 nodules, each up to 4 cm in diameter, open surgical	7211	5-501	operationen: Operationen am Verdauungstrakt: Operationen an der Leber: Lokale Exzision und Destruktion von erkranktem Gewebe der Leber (atypische Leberresektion)	Procedures: Gastrointestinal procedures: Liver procedures: Local excision and destruction of diseased liver tissue (atypical liver resection)	equal		45763716	Extracorporeal resection of liver	700196009	4041977	Gastrointestinal tract excision	118150001	41721739	582046008	wider
6	T	oui	6	Z50.27.15	Lokale Destruktion von Läsion oder Gewebe der Leber, durch irreversible Elektroporation, offen chirurgisch	Local destruction of liver lesion or tissue by irreversible electroporation, open surgery	7217	5-501.7	operationen: Operationen am Verdauungstrakt: Operationen an der Leber: Lokale Exzision und Destruktion von erkranktem Gewebe der Leber (atypische Leberresektion): Destruktion, lokal, durch irreversible Elektroporation	Procedures: Procedures on the digestive tract: Liver procedures: Local excision and destruction of diseased liver tissue (atypical liver resection): Destruction, local, by irreversible electroporation	equal		37158372	Open irreversible electroporation of neoplasm of liver	1258865005	36684842	Irreversible electroporation	457571000124109	473530	-457569741259104	wider
6	T	oui	6	Z50.2A.11	Leberzystenresektion, offen chirurgisch	Open surgical liver cyst resection	7213	5-501.1	operationen: Operationen am Verdauungstrakt: Operationen an der Leber: Lokale Exzision und Destruktion von erkranktem Gewebe der Leber (atypische Leberresektion): Endozystenresektion (bei Echinokokkuszyste)	Procedures: Procedures on the digestive tract: Liver procedures: Local excision and destruction of diseased liver tissue (atypical liver resection): Endocyst resection (in case of echinococcal cyst)	equal		4030150	Excision of liver	107963000	4196966	Local excision of lesion or tissue of clavicle	51122008	-166816	56840992	inexact
6	T	oui	6	Z50.2A.2A	Erweiterte Hemihepatektomie rechts, offen chirurgisch	Extended right hepatectomy, open surgical	7227	5-502.2	operationen: Operationen am Verdauungstrakt: Operationen an der Leber: Anatomische (typische) Leberresektion: Hemihepatektomie rechts [Resektion der Segmente 5 bis 8]	Procedures: Procedures on the digestive tract: Procedures on the liver: Anatomical (typical) liver resection: Right hepatectomy [Resection of segments 5 to 8]	equal		4142327	Extended right hemihepatectomy	307010009	44788740	Right hepatic trisegmentectomy	198571000000108	-40646413	-198570692990099	narrower
6	T	oui	6	Z50.2B.11	Transsektion der Leber und Ligatur von Portalvenenästen, ALPPS, Schritt 1, offen chirurgisch	Liver transection and ligation of portal vein branches, ALPPS, Step 1, open surgical	7232	5-502.7	operationen: Operationen am Verdauungstrakt: Operationen an der Leber: Anatomische (typische) Leberresektion: In-situ-Split mit Ligatur der Pfortader bei einer zweizeitigen Leberresektion	Procedures: Procedures on the digestive tract: Procedures on the liver: Anatomical (typical) liver resection: In-situ split with ligation of the portal vein in a two-stage liver resection	equal		36716850	Associating liver partition and portal vein ligation for staged hepatectomy	723069003	4343116	Second stage of two-stage epispadias repair	236276006	32373734	486792997	inexact
4	T	oui	4	Z50.92	Extrakorporelle Leberassistierung	Extracorporeal liver support	17845	8-858	nicht operative therapeutische massnahmen: Maßnahmen für den Blutkreislauf: Extrakorporale Zirkulation und Behandlung von Blut: Extrakorporale Leberersatztherapie [Leberdialyse]	Non-operative therapeutic measures: Measures for the circulatory system: Extracorporeal circulation and blood treatment: Extracorporeal liver support therapy [liver dialysis]	equal		45763716	Extracorporeal resection of liver	700196009	4180075	Extracorporeal circulation for hepatic assistance	51019008	41583641	649177001	inexact
4	T	oui	4	Z51.01	Perkutane Aspiration der Gallenblase	Percutaneous aspiration of the gallbladder	15019	8-154.2	nicht operative therapeutische massnahmen: Therapeutische Katheterisierung, Aspiration, Punktion und Spülung: Therapeutische Aspiration und Entleerung durch Punktion: Therapeutische perkutane Punktion von Organen des Bauchraumes: Gallenblase	Non-operative therapeutic measures: Therapeutic catheterization, aspiration, puncture and lavage: Therapeutic aspiration and drainage by puncture: Therapeutic percutaneous puncture of abdominal organs: Gallbladder	equal		43531508	Percutaneous aspiration of substance from gallbladder	609226003	4067681	Percutaneous cholecystostomy	174525001	39463827	434701002	wider
4	T	oui	4	Z51.04	Sonstige Cholezystotomie	Other cholecystectomy	7287	5-510.4x	operationen: Operationen am Verdauungstrakt: Operationen an Gallenblase und Gallenwegen: Cholezystotomie und Cholezystostomie: Cholezystostomie: Sonstige	operations: Operations on the digestive tract: Operations on the gallbladder and bile ducts: Cholecystectomy and cholecystostomy: Cholecystostomy: Other	equal		4242997	Cholecystectomy	38102005	4059308	Operation on gallbladder	19744006	183689	18357999	wider
6	T	oui	6	Z51.16.10	Perkutan-transhepatische Endoskopie der Gallenwege	Percutaneous transhepatic endoscopic biliary drainage	7384	5-514.u	operationen: Operationen am Verdauungstrakt: Operationen an Gallenblase und Gallenwegen: Andere Operationen an den Gallengängen: Therapeutische perkutan-transhepatische Endoskopie der Gallenwege	Procedures: Procedures on the digestive tract: Operations on the gallbladder and bile ducts: Other operations on the biliary system: Therapeutic percutaneous transhepatic cholangiography	narrower		44789813	Percutaneous transhepatic biliary drainage single	223811000000102	4043247	Percutaneous transhepatic cholangiogram	16747000	40746566	223810983253102	inexact
6	T	oui	6	Z51.19.20	Endoskopie der Gallenwege durch Inzision der Gallenwege, der Gallenblase oder über den Zystikusstumpf	Endoscopy of the biliary tract through incision of the biliary tract, gallbladder, or via the cystic duct stump	1097	1-695.42	diagnostische massnahmen: Diagnostische Endoskopie: Diagnostische Endoskopie durch Inzision und intraoperativ: Diagnostische Endoskopie des Verdauungstraktes durch Inzision und intraoperativ: Gallenwege: Durch Inzision der Gallenwege, der Gallenblase oder über den Zystikusstumpf	Diagnostic measures: Diagnostic endoscopy: Diagnostic endoscopy through incision and intraoperatively: Diagnostic endoscopy of the digestive tract through incision and intraoperatively: Bile ducts: Through incision of the bile ducts, gallbladder or via the cystic stump	equal		4185899	Incision of gallbladder	44337006	4109727	Operative endoscopy of biliary tract	194091003	76172	-149753997	inexact
4	T	oui	4	Z51.37	Anastomose zwischen Ductus hepaticus und Gastrointestinaltrakt	Anastomosis between the hepatic duct and gastrointestinal tract	7505	5-527	operationen: Operationen am Verdauungstrakt: Operationen am Pankreas: Anastomose des Ductus pancreaticus	Procedures: Procedures on the digestive tract: Pancreatic procedures: Anastomosis of the pancreatic duct	equal		4337833	Anastomosis of hepatic duct to gastrointestinal tract	87231001	4231866	Anastomosis of pancreatic duct	90090007	105967	-2859006	inexact
6	T	oui	6	Z51.41.11	Inzision des Ductus choledochus mit Steinentfernung, offen chirurgisch	Choledochoducts incision with stone removal, open surgery	7433	5-520.2	operationen: Operationen am Verdauungstrakt: Operationen am Pankreas: Inzision des Pankreas: Mit Steinentfernung	Procedures: Procedures on the digestive tract: Procedures on the pancreas: Incision of the pancreas: With stone removal	equal		4048074	Lithotomy	123678003	4043182	Procedure on digestive tract	118826000	4892	4852003	wider
6	T	oui	6	Z51.64.11	Endoskopische Exzision oder Destruktion einer Läsion oder Gewebe aus Gallenwegen oder Sphincter Oddii, photodynamische Therapie	Endoscopic excision or destruction of a lesion or tissue from bile ducts or sphincter of Oddi, photodynamic therapy	7331	5-513.41	operationen: Operationen am Verdauungstrakt: Operationen an Gallenblase und Gallenwegen: Endoskopische Operationen an den Gallengängen: Destruktion: Photodynamische Therapie	Procedures: Procedures on the digestive tract: Operations on the gallbladder and bile ducts: Endoscopic procedures on the biliary tract: Destruction: Photodynamic therapy	equal		4209155	Endoscopic excision of lesion of sphincter of Oddi	56078005	4002567	Gallbladder destructive procedure	119930006	206588	-63852001	inexact
4	T	oui	4	Z51.72	Choledochoplastik	Biliary reconstruction	7395	5-516	operationen: Operationen am Verdauungstrakt: Operationen an Gallenblase und Gallenwegen: Andere Rekonstruktion der Gallengänge	Procedures: Procedures on the digestive tract: Operations on the gallbladder and bile ducts: Other reconstruction of the biliary tract	wider		4003869	Biliary tract reconstruction	119926008	4002070	Gallbladder reconstruction	119927004	1799	-996	narrower
4	T	oui	4	Z51.79	Plastische Rekonstruktion des Ductus cysticus und der Ducti hepatici	Plastic reconstruction of the cystic duct and common hepatic duct	7418	5-518.6	operationen: Operationen am Verdauungstrakt: Operationen an Gallenblase und Gallenwegen: Operationen an Sphincter Oddi und Papilla duodeni major: Plastische Rekonstruktion	Procedures: Procedures on the digestive tract: Operations on the gallbladder and bile ducts: Operations on the sphincter of Oddi and major duodenal papilla: Plastic reconstruction	narrower		4139393	Excision of common hepatic duct	307197006	4002567	Gallbladder destructive procedure	119930006	136826	187267000	inexact
6	T	oui	6	Z51.98.12	Sonstige perkutane Massnahmen an den Gallenwegen, Perkutan-transhepatische Einlage einer Drainage in den Gallengang	Other percutaneous procedures on the biliary tract, percutaneous transhepatic placement of a drainage tube into the bile duct	7384	5-514.u	operationen: Operationen am Verdauungstrakt: Operationen an Gallenblase und Gallenwegen: Andere Operationen an den Gallengängen: Therapeutische perkutan-transhepatische Endoskopie der Gallenwege	Procedures: Procedures on the digestive tract: Operations on the gallbladder and bile ducts: Other operations on the biliary system: Therapeutic percutaneous transhepatic cholangiography	equal		44789813	Percutaneous transhepatic biliary drainage single	223811000000102	4043247	Percutaneous transhepatic cholangiogram	16747000	40746566	223810983253102	inexact
6	T	oui	6	Z51.9A.22	Perkutan-transhepatische Einlage oder Wechsel von selbstexpandierenden, nicht beschichteten Stents in den Gallengang, 2 Stents	Percutaneous transhepatic placement or exchange of self-expanding, uncoated stents into the biliary tract, 2 stents.	7403	5-517.2	operationen: Operationen am Verdauungstrakt: Operationen an Gallenblase und Gallenwegen: Einlegen oder Wechseln von selbstexpandierenden Stents und Stent-Prothesen in die Gallengänge: Einlegen oder Wechsel von 3 selbstexpandierenden ungecoverten Stents	Procedures: Gastrointestinal surgeries: Biliary tract surgeries: Placement or exchange of self-expanding stents and stent prostheses into the biliary ducts: Placement or exchange of 3 self-expanding uncovered stents.	equal		4198452	Percutaneous transhepatic removal of biliary stent	315030002	4162230	Replacement of prosthesis in biliary tract	398113007	36222	-83083005	wider
6	T	oui	6	Z52.01.11	Transgastrale Drainage einer Pankreaszyste, endoskopisch	Transgastric drainage of a pancreatic cyst, endoscopic	7542	5-529.n3	operationen: Operationen am Verdauungstrakt: Operationen am Pankreas: Andere Operationen am Pankreas und am Pankreasgang: Transgastrale Drainage einer Pankreaszyste: Endoskopisch mit Einlegen eines nicht selbstexpandierenden Stents	Procedures: Procedures on the digestive tract: Procedures on the pancreas: Other procedures on the pancreas and pancreatic duct: Transgastric drainage of a pancreatic cyst: Endoscopic with placement of a non-self-expanding stent	equal		4144184	Transgastric drainage of pancreatic cyst	307566004	4144184	Transgastric drainage of pancreatic cyst	307566004	0	0	equal
6	T	oui	6	Z52.09.22	Transduodenale Punktion einer Pankreas(pseudo)zyste, endosonographisch	Transduodenal puncture of a pancreatic cyst, endoscopic	7500	5-526.k	operationen: Operationen am Verdauungstrakt: Operationen am Pankreas: Endoskopische Operationen am Pankreasgang: Transgastrale oder transduodenale Punktion des Pankreasganges	Procedures: Procedures on the digestive tract: Procedures on the pancreas: Endoscopic procedures on the pancreatic duct: Transgastric or transduodenal puncture of the pancreatic duct	equal		4144798	Transduodenal pancreatic biopsy	307191007	4144183	Transgastric drainage of pancreatic lesion	307565000	615	-373993	inexact
6	T	oui	6	Z52.11.12	Feinnadelbiopsie am Pankreas, endosonographisch	Fine-needle aspiration biopsy of the pancreas, endoscopic	410	1-447	diagnostische massnahmen: Biopsie ohne Inzision: Biopsie ohne Inzision an den Verdauungsorganen: Endosonographische Feinnadelpunktion am Pankreas	Diagnostic measures: Incisional biopsy: Incisional biopsy of the digestive organs: Endoscopic fine-needle aspiration of the pancreas	wider		44808849	Endoscopic ultrasonography guided fine needle aspiration biopsy of pancreas	850871000000106	44808849	Endoscopic ultrasonography guided fine needle aspiration biopsy of pancreas	850871000000106	0	0	equal
6	T	oui	6	Z52.83.10	Heterotransplantat des Pankreas, Retransplantation eines Pankreassegmentes während desselben stationären Aufenthaltes	Heterotransplant of the pancreas, retransplantation of a pancreatic segment during the same hospital stay	7517	5-528.4	operationen: Operationen am Verdauungstrakt: Operationen am Pankreas: Transplantation von Pankreas(gewebe): Retransplantation eines Pankreassegmentes während desselben stationären Aufenthaltes	Procedures: Procedures on the digestive tract: Pancreas procedures: Pancreas (tissue) transplantation: Re-transplantation of a pancreatic segment during the same hospital stay	equal		4285877	Heterotransplant of pancreas	67562009	4266668	Transplantation of pancreas	62438007	19209	5124002	wider
6	T	oui	6	Z52.93.10	Endoskopische Einlage und Wechsel eines nicht selbstexpandierenden Stents [Prothese] in den Ductus pancreaticus	Endoscopic placement and exchange of a non-self-expanding stent [prosthesis] in the pancreatic duct	7493	5-526.e1	operationen: Operationen am Verdauungstrakt: Operationen am Pankreas: Endoskopische Operationen am Pankreasgang: Einlegen einer Prothese: Nicht selbstexpandierend	Procedures: Procedures on the digestive tract: Procedures on the pancreas: Endoscopic procedures on the pancreatic duct: Placement of a prosthesis: Non-self-expanding	equal		4067794	Endoscopic change of pancreatic stent	174635004	4069326	Endoscopic retrograde placement of prosthesis in bile duct	174622008	-1532	12996	inexact
6	T	oui	6	Z52.95.80	Implantation eines Markers oder Tracers zur Lokalisation bzw. Steuerung der therapeutischen Intervention am Pankreas, perkutan	Implantation of a marker or tracer for localization and/or guidance of therapeutic interventions on the pancreas, percutaneously	7551	5-529.q0	operationen: Operationen am Verdauungstrakt: Operationen am Pankreas: Andere Operationen am Pankreas und am Pankreasgang: Implantation von Bestrahlungsmarkern am Pankreas: Perkutan	Procedures: Procedures on the digestive tract: Pancreatic procedures: Other procedures on the pancreas and pancreatic duct: Implantation of radiation markers in the pancreas: Percutaneous			40480470	Percutaneous transhepatic transplantation of pancreatic islet cell using fluoroscopic guidance	441754003	4019133	Diagnostic percutaneous aspiration of lesion of pancreas	174769006	36461337	266984997	inexact
6	T	oui	6	Z53.71.21	Operation einer Zwerchfellhernie, abdominaler Zugang, offen chirurgisch, mit Implantation von Membranen und Netzen	Operation of a hiatal hernia, abdominal approach, open surgery, with implantation of membranes and meshes	7689	5-538.1	operationen: Operationen am Verdauungstrakt: Verschluss abdominaler Hernien: Verschluss einer Hernia diaphragmatica: Offen chirurgisch, mit plastischem Bruchpfortenverschluss	Procedures: Gastrointestinal procedures: Abdominal hernia repair: Repair of a diaphragmatic hernia: Open surgically, with prosthetic mesh repair.	narrower		4202994	Repair of diaphragmatic hernia by abdominal approach	52917009	4244280	Anesthesia for transabdominal repair of diaphragmatic hernia	59290003	-41286	-6372994	narrower
6	T	oui	6	Z54.0X.10	Inzision an der Bauchwand, Extraperitoneale Drainage der Bauchwand	Incision in the abdominal wall, extraperitoneal drainage of the abdominal wall	7726	5-540.1	operationen: Operationen am Verdauungstrakt: Andere Operationen in der Bauchregion: Inzision der Bauchwand: Extraperitoneale Drainage	Procedures: Procedures on the digestive tract: Other procedures in the abdominal region: Incision of the abdominal wall: Extraperitoneal drainage	equal		4030685	Incision and drainage of lesion of abdominal wall	238229006	4030685	Incision and drainage of lesion of abdominal wall	238229006	0	0	equal
4	T	oui	4	Z54.11	Probelaparotomie	Laparotomy	7001	5-471.0	operationen: Operationen am Verdauungstrakt: Operationen an der Appendix: Simultane Appendektomie: Während einer Laparotomie aus anderen Gründen	operations: Operations on the digestive tract: Appendix operations: Simultaneous appendectomy: During a laparotomy for other reasons	wider		4314251	Laparotomy	86481000	4293902	Operation on digestive tract	37661000	20349	48820000	wider
6	T	oui	6	Z54.21.10	Laparoskopie, Diagnostische Laparoskopie	Laparoscopy, Diagnostic laparoscopy	937	1-61...1-69	diagnostische massnahmen: Diagnostische Endoskopie	Diagnostic procedures: Diagnostic endoscopy	equal		4251314	Laparoscopy	73632009	4179713	Endoscopic procedure	363687006	71601	-290054997	wider
4	T	oui	4	Z54.25	Peritoneallavage	Peritoneal lavage	14985	8-148.0	nicht operative therapeutische massnahmen: Therapeutische Katheterisierung, Aspiration, Punktion und Spülung: Andere Formen von therapeutischer Katheterisierung und Kanüleneinlage: Therapeutische Drainage von anderen Organen und Geweben: Peritonealraum	Non-operative therapeutic measures: Therapeutic catheterization, aspiration, puncture and lavage: Other forms of therapeutic catheterization and cannulation: Therapeutic drainage of other organs and tissues: Peritoneal cavity	equal		4306203	Peritoneal lavage	387715005	4031456	Puncture and drainage of pleural cavity	238354008	274747	149360997	inexact
6	T	oui	6	Z54.4X.10	Exzision von Appendices epiploicae	Excision of epiploic appendices	7747	5-543.0	operationen: Operationen am Verdauungstrakt: Andere Operationen in der Bauchregion: Exzision und Destruktion von peritonealem Gewebe: Exzision einer Appendix epiploica	Procedures: Procedures on the digestive tract: Other procedures in the abdominal region: Excision and destruction of peritoneal tissue: Excision of an appendix epiploica	equal		4327813	Epiploectomy	75404005	4327813	Epiploectomy	75404005	0	0	equal
4	T	oui	4	Z54.62	Verzögerter Verschluss einer granulierenden Abdominalwunde	Delayed closure of a granulating abdominal wound	7760	5-545.0	operationen: Operationen am Verdauungstrakt: Andere Operationen in der Bauchregion: Verschluss von Bauchwand und Peritoneum: Sekundärer Verschluss der Bauchwand (bei postoperativer Wunddehiszenz)	Procedures: Procedures on the digestive tract: Other procedures in the abdominal region: Closure of the abdominal wall and peritoneum: Secondary closure of the abdominal wall (in case of postoperative wound dehiscence)	equal		4151662	Delayed closure of abdominal wall	28345000	4213456	Closure of abdominal wall dehiscence	80173001	-61794	-51828001	narrower
6	T	oui	6	Z54.71.10	Versorgung einer Gastroschisis, mit Transplantat oder Prothese	Management of a gastroschisis, with graft or prosthesis	7682	5-537.3	operationen: Operationen am Verdauungstrakt: Verschluss abdominaler Hernien: Verschluss kongenitaler Bauchwanddefekte (Omphalozele, Laparoschisis): Mit allogenem oder xenogenem Material	Procedures: Gastrointestinal procedures: Closure of abdominal hernias: Closure of congenital abdominal wall defects (omphalocele, laparoschisis): With allogeneic or xenogeneic material	equal		4241723	Repair of gastroschisis with prosthesis or graft	59164006	45767101	Laparoscopic repair of hernia of anterior abdominal wall with prosthesis	704407008	-41525378	-645243002	narrower
4	T	oui	4	Z54.72	Sonstige Rekonstruktion an der Bauchwand	Other reconstruction of the abdominal wall	7764	5-546	operationen: Operationen am Verdauungstrakt: Andere Operationen in der Bauchregion: Plastische Rekonstruktion von Bauchwand und Peritoneum	Procedures: Procedures on the digestive tract: Other procedures in the abdominal region: Plastic reconstruction of the abdominal wall and peritoneum	equal		36676311	Reconstruction of anterior abdominal wall	773122009	36676311	Reconstruction of anterior abdominal wall	773122009	0	0	equal
6	T	oui	6	Z54.99.31	Debulking über Laparotomie	Debulking via laparotomy	14896	8-122	nicht operative therapeutische massnahmen: Manipulationen an Verdauungstrakt und Harntrakt: Manipulationen am Verdauungstrakt: Desinvagination	Non-operative therapeutic measures: Manipulations of the digestive and urinary tracts: Manipulations of the digestive tract: Desinvagination	equal		4031312	Debulking of lesion of peritoneum	238301005	4062063	Osteopathic manipulation	16992002	-30751	221309003	inexact
6	T	oui	6	Z54.99.50	Anlegen eines temporären Bauchwandverschlusses	Placement of a temporary abdominal wall closure	7761	5-545.1	operationen: Operationen am Verdauungstrakt: Andere Operationen in der Bauchregion: Verschluss von Bauchwand und Peritoneum: Definitiver Verschluss eines temporären Bauchdeckenverschlusses	Procedures: Procedures on the digestive tract: Other procedures in the abdominal region: Closure of the abdominal wall and peritoneum: Definitive closure of a temporary abdominal wall closure	equal		4003570	Abdomen closure	120171006	4242441	Tertiary closure of abdominal wall	5870006	-238871	114301000	narrower
6	T	oui	6	Z54.99.72	Einsatz eines Implantats zur Gewebeverstärkung bei Enterostoma	Implant placement for tissue reinforcement in enterostomy	6910	5-466	operationen: Operationen am Verdauungstrakt: Andere Operationen an Dünn- und Dickdarm: Wiederherstellung der Kontinuität des Darmes bei endständigen Enterostomata	Procedures: Procedures on the digestive tract: Other procedures on small and large intestine: Restoration of intestinal continuity in cases of terminal enterostomata	equivalent		4154312	Reinforcement	28485005	4030657	Operative procedure on small intestine	107936001	123655	-79450996	inexact
[truncated: 278 more rows]

## Sheet: T4 eval3
Supplementary Table 4. Evaluation 3.
[truncated: 495 more rows]
